# Supplementary material for: Strategies to increase influenza vaccination rates: outcomes of a nationwide cross-sectional survey of UK general practice
Source: PubMed Central journal article supplement — BMJ Open. 2012 May 11;2(3):e000851. doi: 10.1136/bmjopen-2011-000851 (PMC3358626; doi:10.1136/bmjopen-2011-000851), 2012-05-11
Supplement: bmjopen-2011-000851.draft_revisions.pdf [file bmjopen-2011-000851.draft_revisions.pdf]

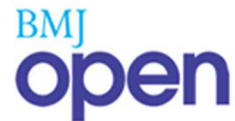

**Seven steps to Increase Influenza Vaccination Rates:  
Outcomes of a Nationwide Cross-sectional Survey of UK  
General Practice**

|                                 |                                                                                                                                                                                                                                                                                                                                                               |
|---------------------------------|---------------------------------------------------------------------------------------------------------------------------------------------------------------------------------------------------------------------------------------------------------------------------------------------------------------------------------------------------------------|
| Journal:                        | <i>BMJ Open</i>                                                                                                                                                                                                                                                                                                                                               |
| Manuscript ID:                  | bmjopen-2011-000851                                                                                                                                                                                                                                                                                                                                           |
| Article Type:                   | Research                                                                                                                                                                                                                                                                                                                                                      |
| Date Submitted by the Author:   | 06-Jan-2012                                                                                                                                                                                                                                                                                                                                                   |
| Complete List of Authors:       | Dexter, Laura; University of Sheffield, Department of Infection and Immunity<br>Teare, M; University of Sheffield, School of Health and Related Research<br>Dexter, Matthew; Retford Health,<br>Siriwardena, Aloysius; University of Lincoln, School of Health and Social Care<br>Read, Robert; University of Sheffield, Department of Infection and Immunity |
| <b>Primary Subject Heading</b>: | General practice / Family practice                                                                                                                                                                                                                                                                                                                            |
| Secondary Subject Heading:      | Evidence based practice, Infectious diseases, Public health                                                                                                                                                                                                                                                                                                   |
| Keywords:                       | PRIMARY CARE, VIROLOGY, VACCINATION                                                                                                                                                                                                                                                                                                                           |
|                                 |                                                                                                                                                                                                                                                                                                                                                               |

SCHOLARONE™  
Manuscripts

**TITLE:**

Seven steps to Increase Influenza Vaccination Rates:

Outcomes of a Nationwide Survey of UK General Practice

**AUTHORS:**

Laura J Dexter, M Dawn Teare, Matthew Dexter, Aloysius N Siriwardena, Robert C Read

**AUTHORS' ADDRESSES AND POSITIONS:**

Academic Unit of Immunology and Infectious Diseases, Department of Infection and Immunity, The University of Sheffield Medical School, Beech Hill Road, Sheffield, S10 2RX, United Kingdom

Laura J Dexter

NIHR Clinical Lecturer in Virology

Health Services Research, School of Health and Related Research, University of Sheffield, Regent Court, 30 Regent Street, Sheffield, S1 4DA, United Kingdom

M Dawn Teare

Lecturer in Medical Epidemiology

Retford Health, Retford Primary Care Centre, North Road, Retford, DN22 7XF, United Kingdom

Matthew Dexter

General Practitioner

Lincoln School of Health and Social Care, University of Lincoln, Brayford Pool, Lincoln, LN6 7TS, United Kingdom

1  
2  
3 Aloysius N Siriwardena  
4

5 Professor of Primary and Pre-hospital Health Care  
6  
7

8  
9  
10 Department of Infection and Immunity, The University of Sheffield Medical School, Beech Hill Road

11 Sheffield, S10 2RX, United Kingdom  
12

13  
14 Robert C Read [guarantor]  
15

16 Professor of Infectious Diseases  
17  
18

19  
20  
21 Correspondence to: L J Dexter [l.dexter@sheffield.ac.uk](mailto:l.dexter@sheffield.ac.uk)  
22  
23

24  
25  
26 The Corresponding Author has the right to grant on behalf of all authors and does grant on behalf of  
27 all authors, an exclusive licence (or non exclusive for government employees) on a worldwide basis to  
28 the BMJ Publishing Group Ltd and its licensees, to permit this article (if accepted) to be published in  
29 BMJ editions and any other BMJPG products and to exploit all subsidiary rights, as set out in our  
30 licence (<http://resources.bmj.com/bmj/authors/checklists-forms/licence-for-publication>).  
31  
32  
33  
34  
35  
36  
37  
38  
39  
40  
41  
42  
43  
44  
45  
46  
47  
48  
49  
50  
51  
52  
53  
54  
55  
56  
57  
58  
59  
60

## ABSTRACT

### *Objective*

To identify practice strategies associated with higher flu vaccination rates in primary care.

### *Design*

Logistic regression analysis of data from a cross-sectional online questionnaire

### *Setting*

795 general practices across England

### *Participants*

569 practice managers, 335 nursing staff and 107 GPs

### *Primary outcome measures*

Flu vaccination rates achieved by each practice in different groups of at-risk patients.

### *Secondary outcome measures*

Practice-level deprivation and ethnicity data; QOF summary scores

### *Results*

Seven independent factors associated with higher vaccine uptake were identified. Having a lead staff member for planning the flu campaign and producing a written report of practice performance predicted an 8% higher vaccination rate for at-risk patients aged <65 years (OR 1.37; 95% CI 1.10 to 1.71). These strategies, plus sending a personal invitation to all eligible patients and only stopping vaccination when QOF targets are reached, predicted a 7% higher vaccination rate (OR 1.45; 95% CI 1.10 to 1.92) in patients ≥65 years. Using a lead member of staff for identifying eligible patients, with

1  
2  
3 either a modified manufacturer's or in-house search program for interrogating the practice IT system,  
4  
5 independently predicted a 4% higher vaccination rate in patients aged  $\geq 65$  years (OR 1.22; 95% CI  
6  
7 1.06 to 1.41 / OR 1.20; 95% CI 1.03 to 1.40). The provision of flu vaccine by midwives was associated  
8  
9 with a 4% higher vaccination rate in pregnant women (OR 1.19; 1.02 to 1.40).  
10  
11

### 12 13 14 15 *Conclusion*

16  
17 Clear leadership, effective communication about performance, and methods used to identify and  
18  
19 contact eligible patients were independently associated with significantly higher rates of flu  
20  
21 vaccination. Financial targets appear to incentivise practices to work harder to maximise seasonal  
22  
23 influenza vaccine uptake. The strategies identified here could help primary care providers to  
24  
25 substantially increase their seasonal flu vaccination rates towards or even above the CMO's targets.  
26  
27  
28  
29  
30  
31  
32  
33  
34  
35  
36  
37  
38  
39  
40  
41  
42  
43  
44  
45  
46  
47  
48  
49  
50  
51  
52  
53  
54  
55  
56  
57  
58  
59  
60

## ARTICLE SUMMARY

### *Article focus*

- Uptake of seasonal influenza vaccination in the UK's at-risk population is below the national and international target of 75%.
- Evidence-based guidance, to advise practices how to optimise all aspects of their flu vaccination campaigns and maximise their likelihood of protecting at-risk patients against flu and its serious sequelae, is greatly needed.
- This study sought to identify which strategies and procedures were associated with higher rates of flu vaccine uptake.

### *Key messages*

- This study has identified seven key strategies that were significantly associated with the success of practices' seasonal flu vaccination campaigns.
- If widely implemented by GP practices, average vaccination rates would be predicted to rise by 7-8% (thereby exceeding the WHO target in patients >65 years).

### *Strengths and limitations of this study*

- The study sample was large and representative, despite a participation rate of only 27.5%.
- Outcome measures (vaccination rates) were objective and corrected for practice size.
- Strategies used to provide and encourage vaccination were self-reported.

## INTRODUCTION

### *Influenza*

Influenza (flu) is a common, potentially severe, but preventable infection that places a high burden on patients and healthcare providers<sup>1-3</sup>. A safe and effective inactivated (killed) vaccine is produced ahead of each flu season, based on strain recommendations provided by the World Health Organisation (WHO), and is offered to at-risk groups in the UK free of charge<sup>4-7</sup>. These groups have been chosen based on evidence showing increased risk of severe flu infection or sequelae: epidemiological data from 2010-2011 indicated that patients in a risk group due to chronic disease had a 10-fold greater risk of mortality due to influenza, compared to those who were not in an at-risk group<sup>1</sup>. During the 2010-2011 flu season 602 deaths in the UK were due directly to influenza<sup>1</sup>. Of those who died, approximately two-thirds were in a clinical risk group that is targeted for vaccination, while only 25% had received vaccination for that season.

WHO guidance indicates that developed countries should achieve 75% influenza vaccine coverage in the elderly, while the European Union Council (EC) advises that members should aim to vaccinate 75% of all those at high risk from influenza infection<sup>8-9</sup>. England's Chief Medical Officer (CMO) has instructed that, in 2011-12, each practice should aim to reach or exceed 75% uptake for people aged 65 years or over, and 60% uptake for at-risk people under age 65 (increasing to 75% by 2013/14)<sup>7</sup>. Published data suggests that approximately 27% of England's population was eligible for free flu vaccination in 2010<sup>10,11</sup>. Providing seasonal influenza vaccination is a large and complex task which is performed well in the UK, in comparison to many other European countries<sup>12</sup>. Over 10 million patients were vaccinated in England in the 2010-11 season: each general practice vaccinating an average of approximately 1000 patients, mostly within a period of 4-6 weeks. The proportion of people aged over 65 years in England who received the 2010/11 influenza vaccine was, at 72.8%, just below the target of 75%<sup>10</sup>. However, both past and current rates of vaccination in the under-65 at-risk groups fall far short of the EC or CMO targets: during 2010/11 the rate achieved was 50.4%; in

1  
2  
3 pregnant women who were not otherwise at risk it was only 36.6%, despite increasing evidence  
4  
5 showing the beneficial effects of protection against flu for both mothers and babies <sup>10 13-15</sup> .  
6  
7

8  
9  
10 A few previous studies have investigated the utility of specific interventions (such as telephone calls  
11  
12 or letters) to generate an increase in uptake, but an optimal overall strategy for primary care  
13  
14 providers remains undefined <sup>16 17</sup> . In this study, we aimed to investigate the entire process of flu  
15  
16 vaccine provision in a wide range of UK general practices, in order to determine the correlates of  
17  
18 higher vaccine uptake and to inform comprehensive, evidence-based recommendations for best  
19  
20 practice.  
21  
22

23  
24  
25  
26  
27  
28  
29  
30  
31  
32  
33  
34  
35  
36  
37  
38  
39  
40  
41  
42  
43  
44  
45  
46  
47  
48  
49  
50  
51  
52  
53  
54  
55  
56  
57  
58  
59  
60

peer review only



## METHODS

### *Survey development*

Individual or small-group interviews with GPs, nurses and practice managers from six practices already achieving high rates of flu vaccination in urban (city), semi-rural (market town) and rural (village) areas were carried out, during which staff were asked to identify the factors considered by practices in designing and carrying out their flu vaccination campaigns. The information gained was used to construct three online questionnaires (one each for the participating groups of GPs, practice managers and practice nurses), using the Survey Monkey web-based software<sup>18</sup>. The format of the questions and the layout of the questionnaires were designed to optimise the statistical utility of the data to be collected. The questionnaires were piloted in the same six practices to further ascertain relevance and usability before final distribution.

### *Questionnaire distribution and survey participants*

We aimed to distribute the questionnaires to all registered GPs, practice nursing staff and practice managers within four Strategic Health Authorities (SHAs) (East Midlands, London, West Midlands and Yorkshire and Humber), which together provide care for approximately 40% of the UK population. Details about the survey were sent via the Public Health teams in the participating SHAs and Primary Care Trusts (PCTs), who were requested to cascade the information to all GPs, nurses and practice managers in their area via normal electronic information circulation mechanisms. The same method was used for all other communications with practice staff during the study. A preliminary e-mail, containing a letter informing primary care teams about the forthcoming study, was distributed two weeks before the first survey invitation. Two emails, inviting participation in the survey and containing web links to the online questionnaires, were then distributed in two consecutive weeks during August 2011.

### *Vaccine uptake data and other comparators*

The Immform web service, which is a UK Department of Health website for collecting vaccination data from general practices, was used to obtain practice-level flu vaccination uptake data for the period 1<sup>st</sup> September 2010 – 28<sup>th</sup> February 2011<sup>19</sup>. Actual numbers vaccinated and actual numbers eligible were recorded for 65+ year olds and at-risk groups of <65 year olds, in addition to data showing the total practice population size. Other practice-level data, including summary Quality and Outcomes Framework (QOF) scores (most recent data available, for April 2009-March 2010) and a variety of demographic measures, were obtained in order to identify and/or adjust for other factors which may differentially affect vaccine uptake rates (such as overall practice quality performance, practice size, population ethnicity or population deprivation)<sup>20 21</sup>. The above information was linked to the questionnaire responses by NHS practice code (a unique six-figure identifier); codes were then removed from the dataset prior to analysis.

### *Statistical analyses*

In analysing the responses to the questionnaires, we sought to identify: differences in routine strategies and procedures in flu vaccination campaigns within the different areas surveyed; whether and how these were associated with vaccine uptake rates; and other co-factors associated with vaccine uptake rates. In addition to a full descriptive analysis of the variables recorded in the questionnaires, logistic regression analyses were performed using STATA to compare the proportions of patients vaccinated across different categorical responses in the survey questionnaire. The logistic regression was based upon absolute numbers of patients vaccinated out of the total at-risk, to account for differences in at-risk practice population size. As there was not always complete agreement between responses from different participants in the same practice, robust standard errors were computed using a cluster correction model, thereby generating data corrected to the practice level. Multivariate regression analysis was performed on any 2 or more results from the same group(s) of participants which showed significance at the 95% level on univariable analysis. We then

1  
2  
3 used the outcomes of these statistical analyses to identify and evaluate the best strategies for  
4  
5 carrying out successful and effective flu vaccination campaigns and how (or indeed whether) these  
6  
7 may be broadly or specifically adopted.  
8  
9  
10  
11  
12  
13  
14  
15  
16  
17  
18  
19  
20  
21  
22  
23  
24  
25  
26  
27  
28  
29  
30  
31  
32  
33  
34  
35  
36  
37  
38  
39  
40  
41  
42  
43  
44  
45  
46  
47  
48  
49  
50  
51  
52  
53  
54  
55  
56  
57  
58  
59  
60

For peer review only

## RESULTS

Fifty PCTs distributed the survey invitation to a total of 2896 practices. Responses were submitted by 569 practice managers, 335 nursing staff and 107 GPs, representing 795 practices (27.5% of those invited to contribute). These practices serve a total of approximately 5.8 million patients, among whom over 1.5 million are eligible for influenza vaccination. The distributions of flu vaccination rates in the surveyed practices were well matched to national patterns (Figure 1). For the majority of eligible patients (i.e. those aged 65 years and above), our findings indicated that the variation between practices' flu vaccination rates was not influenced by differences in the ethnicity or affluence of their patient populations, whereas Quality and Outcomes Framework summary scores showed highly and significant positive correlations with vaccine uptake achieved in both age groups (supplementary table 1). The univariable logistic regression results referred to throughout this section are shown in supplementary table 2.

### *Staffing*

Having a lead member of staff for arranging the practice flu vaccination campaign was associated with increased flu vaccine uptake rates in both 65+ and <65 age groups ( $p = 0.001$  and  $0.004$  respectively). Nominating a staff member with responsibility for identifying eligible patients was associated with increased uptake of vaccine in older age groups ( $p = 0.038$ ), but this trend, although present, did not reach significance in under 65s ( $p = 0.218$ ).

### *Ordering vaccine*

A plot of the number of vaccine doses ordered for 2011-12 versus vaccines used in 2010-11 shows a tight correlation (figure 2a). On average, practices were found to have ordered vaccines based on the number of doses given in the previous season, with an average uplift of 8.8% (95% confidence interval 4.3 – 13.3%;  $n = 568$ ). As vaccines are ordered as a total, these data could not be differentiated into

1  
2  
3 doses intended for vaccination of patients aged over or under 65 years old. However, the data  
4  
5 showed that only 78.3% of responding practices would have been able to vaccinate at least 75% of  
6  
7 their at-risk patients (in accordance with the CMO recommendations) (figure 2b).  
8  
9

### 10 11 12 13 *Contacting patients*

14  
15 Using personal invitations, either alone or in combination with general publicity, was significantly  
16  
17 associated with higher rates of vaccination. The use of personal invitations for all patients (not just  
18  
19 those who did not respond to an initial general publicity campaign) was associated with the highest  
20  
21 vaccination rates in the larger, 65+ age group ( $p = 0.003$ ), although a similar association did not reach  
22  
23 statistical significance in the under 65s. Using both letters and telephone calls was not associated with  
24  
25 significantly different vaccination rates than using either letters or phone calls alone ( $p = 0.721$  for  
26  
27 patients aged 65+;  $p = 0.852$  for patients aged <65).  
28  
29  
30  
31  
32  
33  
34

### 35 36 *Identifying eligible patients*

37  
38 Programmes for identifying eligible patients from the practices' IT system are usually issued by the  
39  
40 software providers. Modifying the IT supplier's standard search or creating a separate in-house search  
41  
42 was associated with significantly higher uptake rates for patients aged 65+ than using an unmodified  
43  
44 IT supplier's search ( $p < 0.001$  and  $0.027$ , respectively). A similar trend for under 65s did not reach  
45  
46 statistical significance, perhaps due to insufficient power. As older patients are identified simply on  
47  
48 the basis of their age at a certain date, which should not require a complicated search strategy, these  
49  
50 findings suggest that creating or modifying a system search reflects that the staff in these practices  
51  
52 are more motivated and/or experienced to use their IT system to try to achieve their flu vaccination  
53  
54 targets.  
55  
56  
57  
58  
59  
60

### *Offering clinics and appointments*

More than 95% of practices held the main vaccination sessions at their usual surgery premises and 75% held the main sessions during normal surgery hours. Most practices reported using a variety of appointment types and timings to provide flu vaccination. Surprisingly, in our data, offering vaccinations at weekends, or before 8am or after 6pm, was not associated with a significant difference in the vaccination uptake rates achieved. Increasing numbers of reminders or repeat invitations were associated with significantly increased vaccine uptake in the under 65 year olds ( $p = 0.038$ ), though not in those aged 65+. Significantly higher rates of vaccination (for under 65s) occurred in practices that identified appointments for flu vaccination using a specific Read code ( $p = 0.038$ ).

### *Vaccinating pregnant women*

The proportion of practices that reported that their community midwives recommended flu vaccination to pregnant women was disappointingly low (57.5%). Furthermore, there was a clear discrepancy between this figure and the proportion that reported that their community midwives actually administered vaccine (17.8%; see figure 3a). Our analysis demonstrated that practices where community midwives were active in administering flu vaccinations to pregnant patients achieved significantly higher rates of uptake in this particular at-risk group ( $p = 0.023$ ).

### *Ending and reviewing the campaign*

A total of 578 practices provided information on what influenced their decision to stop offering flu vaccination. Of major concern was the evidence that almost 50% of practices stopped offering flu vaccines partly, or solely, because they had exhausted their stock. Almost one third (28.9%) cited a financial factor in making their decision and the data showed that ending flu vaccination only once QOF targets had been reached was associated with increased uptake rates for those aged 65+ ( $p =$

1  
2  
3 0.048); in those aged under 65 this was only weakly significant ( $p = 0.100$ ), perhaps influenced by the  
4  
5 smaller numbers of patients in this group. These results suggest that practices that focused on  
6  
7 financial targets were motivated and/or organised to continue their efforts to vaccinate patients  
8  
9 beyond the point at which other practices may stop. In support of this hypothesis, we found that  
10  
11 patients whose vaccination would contribute to a QOF-related payment received an average of 42%  
12  
13 (95% CI 33 to 51%) more reminders more than those who did not have a QOF-registered indication  
14  
15 for vaccination ( $p < 0.001$ ).  
16  
17

18  
19 Practices which produced a written report reviewing their flu vaccination rates achieved very  
20  
21 significantly higher vaccination rates in both younger and older age groups, compared to those  
22  
23 practices which did not produce a written report ( $p = 0.006$  for patients aged 65+;  $p = 0.002$  for  
24  
25 patients aged <65 years). Similarly, reviewing the practice's flu vaccination strategy in a written  
26  
27 format was also significantly associated with achieving higher rates of vaccination ( $p = 0.067$  for  
28  
29 patients aged 65+;  $p = 0.028$  for patients aged <65 years). This finding suggests that that practices  
30  
31 which produced written reports may have been able to organise more rigorous campaigns, and/or  
32  
33 have had more well-informed and motivated staff, resulting in more effective performance.  
34  
35  
36  
37  
38  
39  
40

#### 41 *Personal motivations and attitudes of staff*

42  
43  
44 Figure 3b shows a summary of GPs', nurses' and practice managers' views of the flu vaccination  
45  
46 campaign. There was a significant association between encouraging vaccination among colleagues  
47  
48 and other staff and achieving higher rates of vaccine uptake in patients aged 65 or above ( $p = 0.004$ ),  
49  
50 but not in those aged under 65 years ( $p = 0.208$ ). There was a trend for a similar association between  
51  
52 positive attitudes of staff towards being vaccinated themselves and higher rates of patient  
53  
54 vaccination in a practice, but this did not reach statistical significance in either the older or younger  
55  
56 age group ( $p = 0.440$  and  $0.185$  respectively).  
57  
58  
59  
60

1  
2  
3 *Predicted impact of strategies to increase rates of influenza vaccination*  
4  
5

6 Seven factors were found to have significant, independent positive associations with flu vaccine  
7 uptake levels following multivariable regression analysis (Tables 1a and 1b). For patients aged <65  
8 years, having a lead member of staff for planning the flu campaign and producing a written report of  
9 the practice's performance were associated with a combined odds ratio of 1.37, which predicts an 8%  
10 higher flu vaccination rate for practices that employ these strategies compared to those that do not  
11 (54% vs. 46%).  
12  
13  
14  
15  
16  
17  
18  
19

20 In patients aged 65 or over, a further two factors were also found to remain independently correlated  
21 with increased rates of flu vaccination. These were sending a personal invitation to all eligible patients  
22 and only stopping vaccination when QOF targets are reached. The overall odds ratio associated with  
23 the implementation of all four strategies in this age group was 1.45, which predicts a 7% higher  
24 vaccination rate in this age group when these strategies are used (78% vs. 71%).  
25  
26  
27  
28  
29  
30  
31  
32

33 The strategies of using a lead member of staff for identifying eligible patients and either a modified  
34 manufacturer's search program or an in-house search program for interrogating the practice IT  
35 system were also independently correlated with increased rates of flu vaccination in patients aged 65  
36 years or more. However, the effect seen was weaker as this data is derived from a subset of  
37 responses from practice managers only, suggesting a rise to 78% from a baseline of 74%.  
38  
39  
40  
41  
42  
43  
44

45 The active involvement of midwives in providing flu vaccination was significantly associated with  
46 higher levels of vaccine uptake in pregnant women but, as the only significant variable within this  
47 group, the finding could not be included in a multivariable analysis. However, applying the odds ratio  
48 of 1.20 predicted by the univariable analysis, our data indicates that the provision of vaccination by  
49 midwives rather than GPs is associated with an increase in uptake rate to 45% in pregnant women  
50 (from an observed average baseline vaccination rate of 41% in our cohort).  
51  
52  
53  
54  
55  
56  
57  
58  
59  
60



## DISCUSSION

This study has identified seven factors which GPs might use to improve and maximise uptake of seasonal flu vaccine in at-risk patients. Many of these strategies are common sense and align with the empirical guidance given by the English and Scottish CMOs<sup>22 23</sup>, but our study provides the first statistical evidence to support the validity of such approaches. The study sample was large and appeared to be representative of the overall cohort, despite a participation rate of only 27.5%. Although we found no evidence for selection bias of participating practice staff, when the vaccination rates of participating practices were compared with national data, it remains possible that the responses of staff who completed the questionnaire did not reliably represent the views of all practice staff within those participating practices. However, most of our questions sought factual data rather than opinions and so this bias, if present, is likely to be limited.

Numerous patient-related factors affect flu vaccine uptake. Public perception of influenza as a significant threat to health and of vaccination as an effective preventative strategy is associated with higher uptake<sup>24</sup>. People who receive information about these factors from official health sources (particularly GPs or nurses in the primary care setting) and who think that others want them to be vaccinated are more likely to get vaccinated<sup>12 24 25</sup>. In line with this, flu vaccination uptake is greater among older people and others who make routine use of hospital and community care services<sup>26</sup>. Unsurprisingly, fear of side-effects of vaccination is a strong negative influence, while lack of general motivation and ignorance about the recommendations are other commonly reported barriers to both seasonal and pandemic vaccination<sup>27 28</sup>. However, when intensive recall stimuli and information are provided to at-risk patients, as few as 3.5% will refuse vaccination, suggesting that patient attitudes are malleable and should not present a barrier to achieving the CMO's aims<sup>29</sup>. Our results strongly support the provision of personal invitations for all patients (in alternative languages and/or formats, if required), as advised by the CMO<sup>22</sup>. However, we found little evidence of benefit from offering very early (before 8am), late (after 6pm) or weekend appointments. This contradicts some current

1  
2  
3 guidance<sup>22</sup> and is likely to be of financial relevance for practices. Our findings with respect to the flu  
4  
5 vaccination of pregnant women are also important. Although administering flu vaccine is not part of  
6  
7 the current role of many midwives, it is logical that the ability both to discuss and to provide  
8  
9 vaccination to pregnant women would increase uptake in this risk group by removing the need for  
10  
11 referral and attendance at a separate clinic: our analyses now support this logic. However, if midwives  
12  
13 were to provide influenza vaccination outside of the practice setting, it would be essential for reliable  
14  
15 records of this to be transferred to the GP  
16  
17

18  
19 The need for good communication with patients, to encourage the uptake of flu vaccination, is  
20  
21 axiomatic. However, several statistically significant outcomes of our analyses have not previously  
22  
23 been described and are directly or indirectly associated with the quality or extent of communication  
24  
25 *within* practices. The production of a written review of practice performance might be associated with  
26  
27 higher flu vaccination rates for a number of reasons. Production of such a report indicates that at  
28  
29 least one member of staff must be able to access and manipulate the relevant data using their  
30  
31 practice's computer systems, and is motivated to do so. Subsequent dissemination of the report  
32  
33 allows staff to become aware of their practice's performance and identify areas for improvement.  
34  
35 Only 20% of practices in our study produced a written report of vaccine uptake rates and this strategy  
36  
37 is not currently recommended in the CMO guidance for England. Our results also indicate that each  
38  
39 practice should nominate lead members of staff not only for organising the practice's influenza  
40  
41 vaccination campaign (as advised by the English and Scottish CMOs<sup>22 23</sup>, but also for identifying at-risk  
42  
43 patients from the practice database. This is supported by a recently published study from the US,  
44  
45 which suggested that effective use of electronic databases by a skilled data manager could increase  
46  
47 the rate of flu vaccination by over 10%<sup>30</sup>. Our study's findings also suggest that the effectiveness of a  
48  
49 practice's flu vaccination campaign is increased when staff promote vaccination among themselves,  
50  
51 an effect which may arise from increased motivation for the campaign as a whole or through  
52  
53 communication of their positive attitude to at-risk patients. This supports the findings of previous  
54  
55 studies and should thus contribute to an increased impetus to encourage vaccination of staff<sup>31 32</sup>.  
56  
57  
58  
59  
60

1  
2  
3 There is currently a significant financial risk for practices attempting to improve their vaccination  
4 rates. As practices are only reimbursed on the basis of the number of vaccines administered, they  
5 face a financial penalty if they buy more doses than are used and sale-or-return schemes are usually  
6 limited to a few percent of the vaccine doses in the overall order. Perhaps as a result, we have found  
7 that almost 50% of practices currently halt their vaccination campaigns due to exhaustion of vaccine  
8 stocks. A central procurement strategy for flu vaccines, which has recently undergone consultation by  
9 the Department of Health, should remove this financial stricture and allow practices to aim for much  
10 higher vaccination rates without risking financial penalty<sup>33</sup>. However, this will also result in the loss of  
11 a significant proportion of practices' funding for flu vaccination (i.e. that which is currently derived  
12 from any discrepancy between tariff price and purchased price for the vaccine itself). Considerable  
13 effort and resources are required to deliver a successful flu vaccination campaign, and our findings  
14 indicate that practices' efforts can be influenced by financial motivations. The pursuit of QOF targets  
15 for flu vaccination requires practice staff to be able to perform complex interrogations of their patient  
16 database and to be aware of rates of vaccine uptake while the flu vaccination campaign is  
17 progressing. Our data suggests that pursuing the QOF targets may motivate practices to maintain  
18 vaccine stocks and encourage extra patients to receive vaccine. We would not advise that practices  
19 should automatically stop vaccinating patients once their QOF targets have been attained. However,  
20 our findings suggest that a scale of financially-supported targets applicable across all patient groups,  
21 or the inclusion of flu vaccination of all at-risk patients in the QOF scheme, might be a powerful tool  
22 to increase flu vaccine uptake.  
23  
24  
25  
26  
27  
28  
29  
30  
31  
32  
33  
34  
35  
36  
37  
38  
39  
40  
41  
42  
43  
44  
45  
46  
47  
48  
49

50 Current vaccines achieve around 50-80% protection against influenza and associated sequelae in at-  
51 risk groups<sup>4 34-36</sup>. However, these efficacy rates do not translate into public health protection if the  
52 vaccine is not delivered effectively to the communities that need it. With flu vaccination rates varying  
53 from 15 to 100% (Figure 1) between the worst and best practices in our nationwide cohort, there is  
54 the potential for enormous gains to be made. This study has identified seven simple steps that can  
55 improve our performance and increase the protection of at-risk patients.  
56  
57  
58  
59  
60

## ACKNOWLEDGEMENTS

This study was an independent report commissioned and funded by the Policy Research Programme in the Department of Health, UK (reference number 039/0035). The views expressed are not necessarily those of the Department. The study was sponsored and granted ethical approval by the University of Sheffield. We are grateful to the survey participants for taking part; to Dr Mark Ashworth, GP and Clinical Senior Lecturer at King's College London for providing the demographic and deprivation data; to Dr Helen Carter, Consultant in Public Health at NHS West Midlands, Dr Andrew Clark, Deputy Director of Public Health at NHS Yorkshire and Humber, Dr Giri Rajaratnam, Deputy Regional Director of Public Health at NHS East Midlands, Dr Leslyn Rew, Project Manager at NHS West Midlands and Dr Chloe Sellwood, Pandemic Flu Lead at NHS London and their Vaccination & Immunisation teams for arranging circulation of the survey details to primary care teams; to staff at Bridgegate, Crown House, Riverside, and Tall Trees Surgeries in Retford, Charnock Health Primary Care Centre in Sheffield, and Bawtry and Blyth Health Centre in Bawtry for feedback on questionnaire and guideline design; and to Mr Gerald Ellis, Business Manager at Retford Health for co-ordinating feedback.

Data sharing: the availability of additional data is subject to consent for its dissemination from the Department of Health Central Commissioning Facility. Neither the study sponsor nor the funder played any role in study design; in the collection, analysis, and interpretation of data; in the writing of the report; or in the decision to submit the article for publication. All authors had access to the study data (including statistical reports and tables) and can take responsibility for the integrity of the data and the accuracy of the data analysis.

Contributors: LJD designed, carried out and coordinated analysis and reporting of the study, and also drafted and revised this manuscript. MDT contributed to statistical aspects of design, carried out the

1  
2  
3 formal data analysis and contributed to the manuscript. MD and ANS contributed to primary care and  
4  
5 policy aspects of study design and interpretation and also revised the manuscript. RCR contributed to  
6  
7 study design and interpretation and revised the manuscript. He is guarantor.  
8  
9

10  
11  
12 The Corresponding Author has the right to grant on behalf of all authors and does grant on behalf of  
13  
14 all authors, an exclusive licence (or non exclusive for government employees) on a worldwide basis to  
15  
16 the BMJ Publishing Group Ltd and its licensees, to permit this article (if accepted) to be published in  
17  
18 BMJ editions and any other BMJPG products and to exploit all subsidiary rights, as set out in our  
19  
20 licence (<http://resources.bmj.com/bmj/authors/checklists-forms/licence-for-publication>)  
21  
22  
23  
24  
25

26  
27 All authors have completed the Unified Competing Interest form at [www.icmje.org/coi\\_disclosure.pdf](http://www.icmje.org/coi_disclosure.pdf)  
28  
29 (available on request from the corresponding author) and declare that (1) LJD, MDT, MD, ANS and  
30  
31 RCR have no support from companies for the submitted work; (2) LJD, MDT, MD, ANS and RCR have  
32  
33 no relationships with companies that might have an interest in the submitted work in the previous 3  
34  
35 years; (3) their spouses, partners, or children have no financial relationships that may be relevant to  
36  
37 the submitted work; and (4) LJD, MDT, MD, ANS and RCR have no non-financial interests that may be  
38  
39 relevant to the submitted work.  
40  
41  
42  
43  
44  
45  
46  
47  
48  
49  
50  
51  
52  
53  
54  
55  
56  
57  
58  
59  
60

## REFERENCES

1. Surveillance of influenza and other respiratory viruses in the UK 2010/11: Health Protection Agency, 2011.
2. Fleming DM, Elliot, A.J., Nguyen-Van-Tam, et al. A Winter's Tale: coming to terms with winter respiratory illnesses: Health Protection Agency, 2005.
3. source: Mintel.
4. Pebody R, Hardelid P, Fleming D, et al. Effectiveness of seasonal 2010/11 and pandemic influenza A(H1N1)2009 vaccines in preventing influenza infection in the United Kingdom: mid-season analysis 2010/11. *Euro Surveill* 2011;16(6).
5. Mangtani P, Cumberland P, Hodgson CR, et al. A cohort study of the effectiveness of influenza vaccine in older people, performed using the United Kingdom general practice research database. *J Infect Dis* 2004;190(1):1-10.
6. Influenza [chapter 19]. *Immunisation against infectious disease*: Department of Health, 2011.
7. Davies S. Letter from the CMO: Preparation and Assurance for 2011/12 Seasonal Influenza Immunisation Programme: Department of Health, 2011.
8. 56th World Health Assembly: Prevention and control of influenza pandemics and annual epidemics; 2003.
9. Council of the European Union. *Council Recommendation of 22 December 2009 on seasonal influenza vaccination (2009/1019/EU)*. *Official Journal of the European Union* 2009;348(71).
10. Begum F, Pebody R. Seasonal influenza vaccine uptake amongst GP patient groups in England, Winter season 2010-11: Department of Health, 2011.
11. Annual Mid-year Population Estimates, 2010: Office for National Statistics, 2011:6.
12. Blank PR, Schwenkglens M, Szucs TD. Vaccination coverage rates in eleven European countries during two consecutive influenza seasons. *J Infect* 2009;58(6):446-58.
13. Puleston RL, Bugg G, Hoschler K, et al. Observational study to investigate vertically acquired passive immunity in babies of mothers vaccinated against H1N1v during pregnancy. *Health Technol Assess* 2010;14(55):1-82.
14. Benowitz I, Esposito DB, Gracey KD, et al. Influenza vaccine given to pregnant women reduces hospitalization due to influenza in their infants. *Clin Infect Dis* 2010;51(12):1355-61.
15. Eick AA, Uyeki TM, Klimov A, et al. Maternal influenza vaccination and effect on influenza virus infection in young infants. *Arch Pediatr Adolesc Med* 2011;165(2):104-11.
16. Siriwardena AN, Rashid A, Johnson MR, et al. Cluster randomised controlled trial of an educational outreach visit to improve influenza and pneumococcal immunisation rates in primary care. *Br J Gen Pract* 2002;52(482):735-40.
17. Furey A, Robinson E, Young Y. Improving influenza immunisation coverage in 2000-2001: a baseline survey, review of the evidence and sharing of best practice. *Commun Dis Public Health* 2001;4(3):183-7.
18. [www.surveymonkey.com](http://www.surveymonkey.com).
19. [www.immform.dh.gov.uk](http://www.immform.dh.gov.uk).
20. Practice-level ethnicity and other demographic data for 2009 kindly provided by Dr Mark Ashworth, Department of Primary Care & Public Health Sciences, King's College London.
21. From: <http://www.ic.nhs.uk/statistics-and-data-collections/supporting-information/audits-and-performance/the-quality-and-outcomes-framework/qof-2009-10/data-tables>.
22. Seasonal Flu Plan: Department of Health, 2011.
23. Seasonal Influenza and Pneumococcal Immunisation Programmes 2010-11 (letter); accessed at [http://www.sehd.scot.nhs.uk/cmo/CMO\(2010\)19.pdf](http://www.sehd.scot.nhs.uk/cmo/CMO(2010)19.pdf) Chief Medical Officer and Public Health Directorate, Scotland.
24. Bish A, Yardley L, Nicoll A, et al. Factors associated with uptake of vaccination against pandemic influenza: A systematic review. *Vaccine* 2011.

- 1
- 2
- 3 25. Maurer J, Harris KM. Contact and communication with healthcare providers regarding influenza
- 4 vaccination during the 2009-2010 H1N1 pandemic. *Prev Med* 2011;52(6):459-64.
- 5 26. Crawford VL, O'Hanlon A, McGee H. The effect of patient characteristics upon uptake of the
- 6 influenza vaccination: a study comparing community-based older adults in two healthcare
- 7 systems. *Age Ageing* 2011;40(1):35-41.
- 8 27. Myers LB, Goodwin R. Determinants of adults' intention to vaccinate against pandemic swine flu.
- 9 *BMC Public Health* 2011;11(1):15.
- 10 28. Keenan H, Campbell J, Evans PH. Influenza vaccination in patients with asthma: why is the uptake
- 11 so low? *Br J Gen Pract* 2007;57(538):359-63.
- 12 29. Humiston SG, Bennett NM, Long C, et al. Increasing inner-city adult influenza vaccination rates: a
- 13 randomized controlled trial. *Public Health Rep* 2011;126 Suppl 2:39-47.
- 14 30. Loo TS, Davis RB, Lipsitz LA, et al. Electronic medical record reminders and panel management to
- 15 improve primary care of elderly patients. *Arch Intern Med* 2011;171(17):1552-8.
- 16 31. Abramson ZH, Levi O. Is performance of influenza vaccination in the elderly related to treating
- 17 physician's self immunization and other physician characteristics? *Prev Med* 2008;47(5):550-
- 18 3. *Prev Med* 2008;47(5):550-3.
- 19 32. Nichol KL, Zimmerman R. Generalist and subspecialist physicians' knowledge, attitudes, and
- 20 practices regarding influenza and pneumococcal vaccinations for elderly and other high-risk
- 21 patients: a nationwide survey. *Arch Intern Med* 2001;161(22):2702-8.
- 22 33. A review of the procurement of seasonal flu vaccine 2011: Immunisation Branch, Department of
- 23 Health, 2011.
- 24 34. Schembri S, Morant S, Winter JH, et al. Influenza but not pneumococcal vaccination protects
- 25 against all-cause mortality in patients with COPD. *Thorax* 2009;64(7):567-72.
- 26 35. Jackson LA, Gaglani MJ, Keyserling HL, et al. Safety, efficacy, and immunogenicity of an inactivated
- 27 influenza vaccine in healthy adults: a randomized, placebo-controlled trial over two influenza
- 28 seasons. *BMC Infect Dis* 2010;10:71.
- 29 36. Osterholm MT, Kelley NS, Sommer A, et al. Efficacy and effectiveness of influenza vaccines: a
- 30 systematic review and meta-analysis. *Lancet Infect Dis* 2011.
- 31
- 32
- 33
- 34
- 35
- 36
- 37
- 38
- 39
- 40
- 41
- 42
- 43
- 44
- 45
- 46
- 47
- 48
- 49
- 50
- 51
- 52
- 53
- 54
- 55
- 56
- 57
- 58
- 59
- 60

1  
2  
3 *Figure 1*  
4

5 Box and whisker plots showing the range and distribution of influenza vaccination uptake rates for  
6 patients aged 65 years + (blue boxes and bars) and at-risk patients aged under 65 years (red boxes  
7 and bars). The distribution of uptake rates for non-participating practices (N = 2101) and participating  
8 practices (N = 795) are not significantly different.  
9  
10  
11  
12  
13  
14  
15  
16  
17  
18  
19  
20  
21  
22  
23  
24  
25  
26  
27  
28  
29  
30  
31  
32  
33  
34  
35  
36  
37  
38  
39  
40  
41  
42  
43  
44  
45  
46  
47  
48  
49  
50  
51  
52  
53  
54  
55  
56  
57  
58  
59  
60

For peer review only



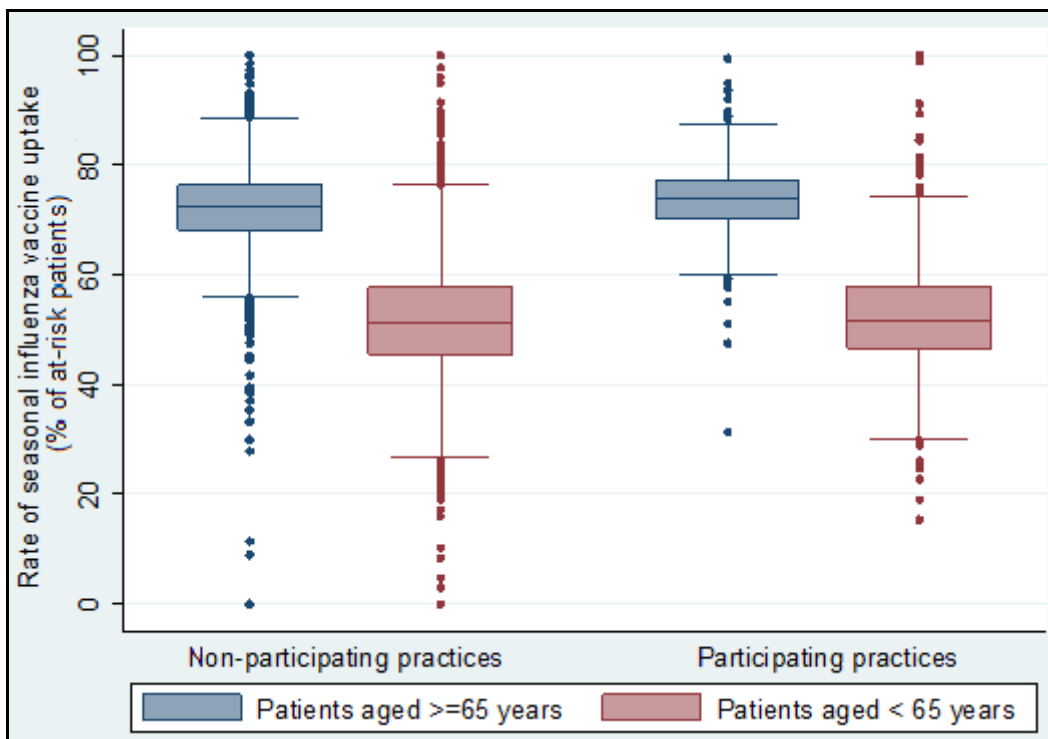

review only

1  
2  
3  
4  
5  
6  
7  
8  
9  
10  
11  
12  
13  
14  
15  
16  
17  
18  
19  
20  
21  
22  
23  
24  
25  
26  
27  
28  
29  
30  
31  
32  
33  
34  
35  
36  
37  
38  
39  
40  
41  
42  
43  
44  
45  
46  
47  
48  
49  
50  
51  
52  
53  
54  
55  
56  
57  
58  
59  
60

1  
2  
3 *Figure 2*  
4

5 (a) Relationship between reported total number of vaccine doses ordered for the 2011-2012 season  
6 and actual number of doses administered in 2010-2011 (n = 568), and (b) Plot showing the maximum  
7 average achievable vaccination rates for the 2011-2012 season, based on the total number of vaccine  
8 doses ordered and the total number of eligible patients. Red line indicates the CMO's target of 75%.  
9  
10  
11  
12  
13  
14  
15  
16  
17  
18  
19  
20  
21  
22  
23  
24  
25  
26  
27  
28  
29  
30  
31  
32  
33  
34  
35  
36  
37  
38  
39  
40  
41  
42  
43  
44  
45  
46  
47  
48  
49  
50  
51  
52  
53  
54  
55  
56  
57  
58  
59  
60

For peer review only

1  
2  
3  
4  
5  
6  
7  
8  
9  
10  
11  
12  
13  
14  
15  
16  
17  
18  
19  
20  
21  
22  
23  
24  
25  
26  
27  
28  
29  
30  
31  
32  
33  
34  
35  
36  
37  
38  
39  
40  
41  
42  
43  
44  
45  
46  
47  
48  
49  
50  
51  
52  
53  
54  
55  
56  
57  
58  
59  
60

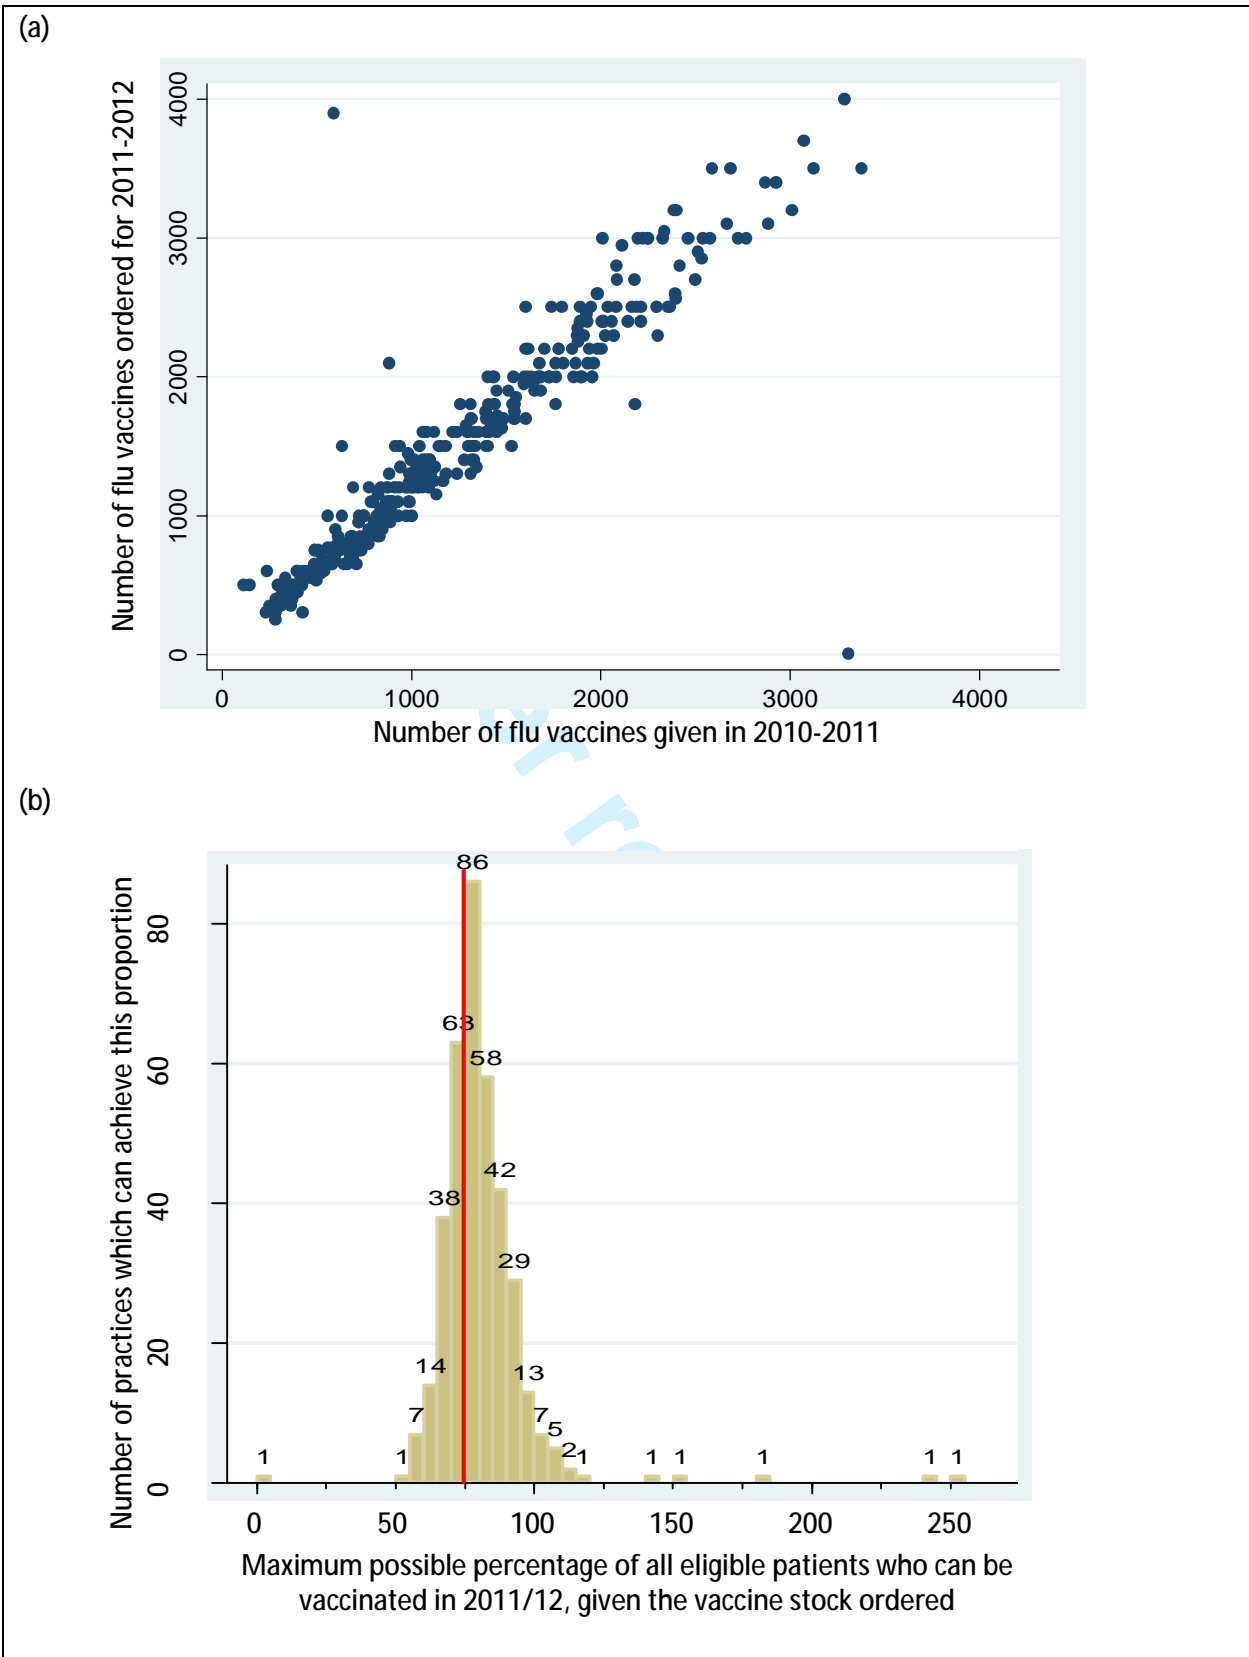

1  
2  
3  
4 *Figure 3*  
5  
6

7  
8 Showing (a) the reported activity of community midwifery teams in recommending and providing  
9 seasonal influenza vaccination to pregnant women, and (b) the attitudes of participating healthcare  
10 workers to vaccination of colleagues and themselves  
11  
12  
13  
14  
15  
16  
17  
18  
19  
20  
21  
22  
23  
24  
25  
26  
27  
28  
29  
30  
31  
32  
33  
34  
35  
36  
37  
38  
39  
40  
41  
42  
43  
44  
45  
46  
47  
48  
49  
50  
51  
52  
53  
54  
55  
56  
57  
58  
59  
60

For peer review only

1  
2  
3  
4  
5  
6  
7  
8  
9  
10  
11  
12  
13  
14  
15  
16  
17  
18  
19  
20  
21  
22  
23  
24  
25  
26  
27  
28  
29  
30  
31  
32  
33  
34  
35  
36  
37  
38  
39  
40  
41  
42  
43  
44  
45  
46  
47  
48  
49  
50  
51  
52  
53  
54  
55  
56  
57  
58  
59  
60

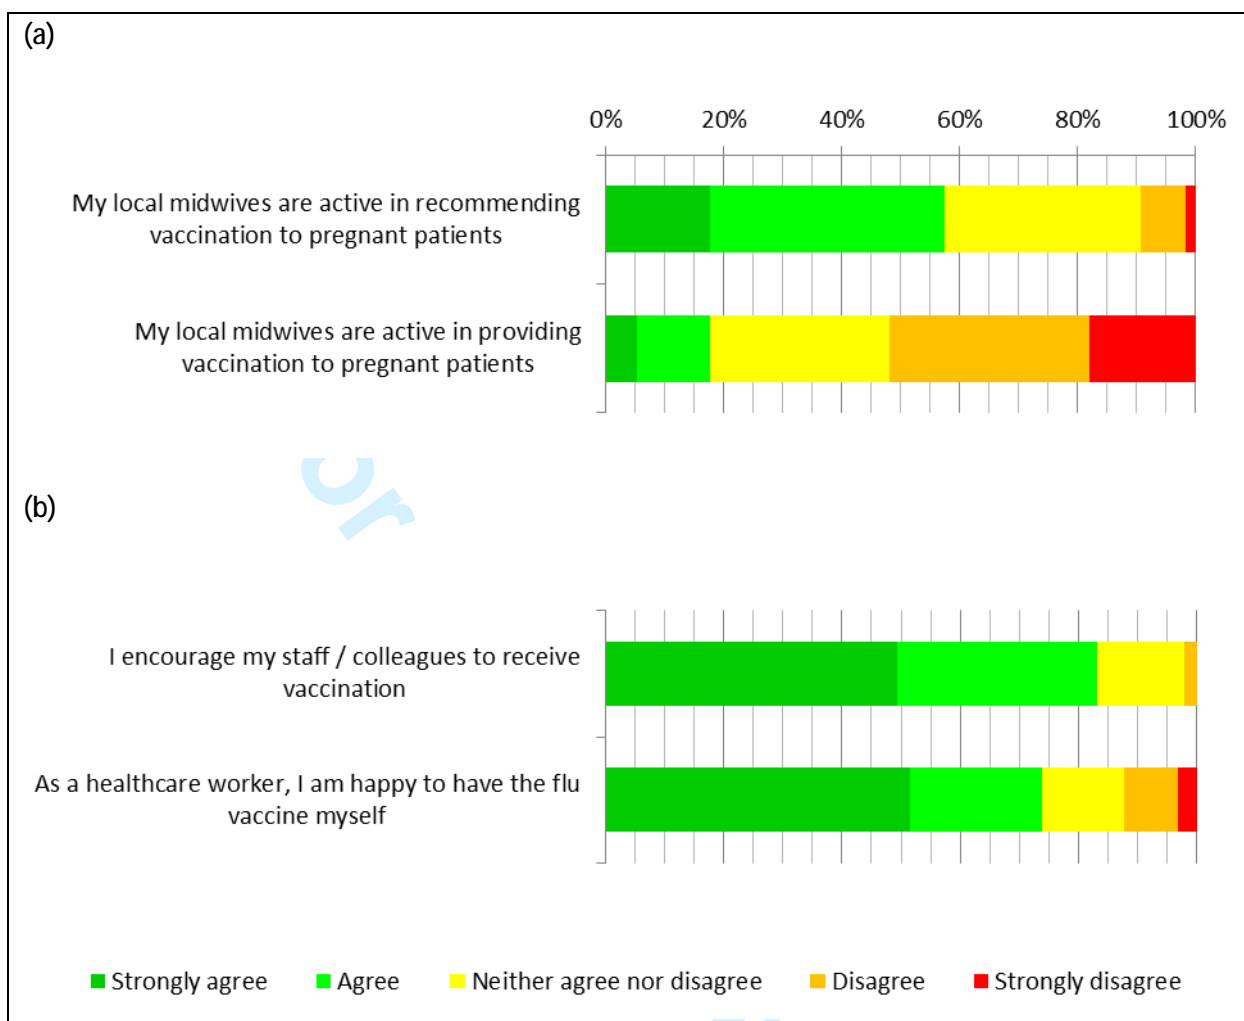

1 *Table 1a*

2  
3 Statistically significant results found on multivariate regression analysis of responses from all three types of staff (GPs, nursing staff and practice managers)  
4  
5  
6  
7  
8  
9

10  
11  
12  
13  
14  
15  
16  
17  
18  
19  
20  
21  
22  
23  
24  
25  
26  
27  
28  
29  
30  
31  
32  
33  
34  
35  
36  
37  
38  
39  
40  
41  
42  
43  
44  
45  
46  
47

For peer review only

| Factor                                                                             | Patient age group | Regression co-efficient                                     | 95% CI        | p-value | Number of clusters |
|------------------------------------------------------------------------------------|-------------------|-------------------------------------------------------------|---------------|---------|--------------------|
| Producing a written report to review flu vaccine uptake rates                      | ≥ 65 years        | 0.065                                                       | 0.023 – 0.107 | 0.010   | 659                |
|                                                                                    | < 65 years        | 0.113                                                       | 0.042 – 0.184 | 0.002   | 783                |
| Having a lead member of staff for planning the practice's flu vaccination campaign | ≥ 65 years        | 0.144                                                       | 0.035 – 0.253 | 0.010   | 659                |
|                                                                                    | < 65 years        | 0.203                                                       | 0.054 – 0.352 | 0.008   | 783                |
| Sending a personal invitation to all eligible patients                             | ≥ 65 years        | 0.081                                                       | 0.035 – 0.127 | 0.001   | 659                |
|                                                                                    | < 65 years        | <i>Not tested as not significant on univariate analysis</i> |               |         |                    |
| Only stopping vaccination when QOF targets are reached                             | ≥ 65 years        | 0.085                                                       | 0.004 – 0.166 | 0.039   | 659                |
|                                                                                    | < 65 years        | <i>Not tested as not significant on univariate analysis</i> |               |         |                    |

1 *Table 1b*

2  
3 Statistically significant results found on multivariate regression analysis of responses from practice managers only  
4  
5  
6  
7  
8  
9  
10  
11  
12  
13  
14  
15  
16  
17  
18  
19  
20  
21  
22  
23  
24  
25  
26  
27  
28  
29  
30  
31  
32  
33  
34  
35  
36  
37  
38  
39  
40  
41  
42  
43  
44  
45  
46  
47

For peer review only



| Factor                                                                          | Patient age group | Regression co-efficient | 95% CI        | p-value | Number of clusters |
|---------------------------------------------------------------------------------|-------------------|-------------------------|---------------|---------|--------------------|
| Identifying eligible patients using a modified manufacturer's search program    | ≥ 65 years        | 0.115                   | 0.056 – 0.175 | 0.000   | 395                |
| Identifying eligible patients using an in-house search program                  | ≥ 65 years        | 0.096                   | 0.028 – 0.163 | 0.006   | 395                |
| Having a lead member of staff for identifying eligible patients in the practice | ≥ 65 years        | 0.086                   | 0.001 – 0.170 | 0.046   | 395                |

Peer review only

1 *Supplementary table 1*

2  
3 Showing results of linear regression analyses of relationship between seasonal flu vaccination uptake rates, for patients aged 65+ (clear cells) and patients aged under 65  
4  
5 (shaded cells), by ethnicity; deprivation; and Quality and Outcomes Framework summary scores [n = 795].  
6  
7  
8  
9  
10  
11  
12  
13  
14  
15  
16  
17  
18  
19  
20  
21  
22  
23  
24  
25  
26  
27  
28  
29  
30  
31  
32  
33  
34  
35  
36  
37  
38  
39  
40  
41  
42  
43  
44  
45  
46  
47

For peer review only

| Factor                                                | Regression coefficient | 95% confidence interval | p-value |
|-------------------------------------------------------|------------------------|-------------------------|---------|
| Increasing proportion of white ethnicity              | 0.015                  | -0.014 to 0.043         | 0.305   |
|                                                       | -0.140                 | -0.167 to -0.114        | <0.001  |
| Increasing index of multiple deprivation (IMD) score  | -0.0009                | -0.0015 to -0.0007      | <0.001  |
|                                                       | 0.0001                 | -0.0017 to 0.0004       | 0.380   |
| Increasing Quality and Outcomes Framework (QOF) score | 1.430                  | 1.299 to 1.561          | <0.001  |
|                                                       | 0.918                  | 0.781 to 1.054          | <0.001  |

Peer review only

1 *Supplementary table 2*

2  
3 Showing factor analysed, number of respondents, and results of logistic regression analyses of responses with respect to flu vaccination uptake rates in patients aged  
4  
5 65 years and over (clear boxes), uptake rates in patients aged under 65 years (shaded boxes) and uptake rates in otherwise healthy pregnant women (hatched boxes).  
6  
7  
8 Calculations were performed using Stata and incorporate robust cluster adjustment to reflect the number of responding practices (where appropriate).  
9  
10  
11  
12  
13  
14  
15  
16  
17  
18  
19  
20  
21  
22  
23  
24  
25  
26  
27  
28  
29  
30  
31  
32  
33  
34  
35  
36  
37  
38  
39  
40  
41  
42  
43  
44  
45  
46  
47

For peer review only

| Factor                                                                        | Respondents |     |     | Baseline                                                   | Comparator                                      | Regression co-efficient | 95% confidence interval          | p-value        | Number of clusters |
|-------------------------------------------------------------------------------|-------------|-----|-----|------------------------------------------------------------|-------------------------------------------------|-------------------------|----------------------------------|----------------|--------------------|
|                                                                               | PM          | PN  | GP  |                                                            |                                                 |                         |                                  |                |                    |
| Lead member of staff for planning seasonal flu vaccination                    | 568         | 336 | 105 | Yes                                                        | No                                              | 0.185<br>0.220          | 0.075 – 0.295<br>0.069 – 0.371   | 0.001<br>0.004 | 783                |
| Dedicated member of staff for identifying eligible patients                   | 414         | N/A | N/A | No                                                         | Yes                                             | 0.087<br>0.080          | 0.005 – 0.169<br>-0.048 – 0.208  | 0.038<br>0.218 | 397                |
| Use of a dedicated IT code to record appointment bookings for vaccination     | 414         | N/A | N/A | No                                                         | Yes                                             | 0.006<br>0.092          | -0.054 – 0.066<br>0.005 – 0.179  | 0.844<br>0.038 | 380                |
| Methods used to encourage patients to attend for vaccination                  | 415         | 304 | 107 | General publicity only                                     | General publicity & personal invitation for all | 0.105<br>0.010          | 0.032 – 0.177<br>-0.019 – 0.226  | 0.005<br>0.097 | 662                |
|                                                                               |             |     |     | General publicity & personal invitation for non-responders | General publicity & personal invitation for all | 0.074<br>0.042          | 0.025 – 0.124<br>-0.243 – 0.109  | 0.003<br>0.215 |                    |
| Personal invitation methods used to invite patients to attend for vaccination | 362         | N/A | N/A | Letter <i>or</i> telephone calls                           | Letter <i>and</i> telephone calls               | 0.011<br>-0.009         | -0.051 – 0.073<br>-0.107 – 0.882 | 0.721<br>0.852 | 338                |
| Number of reminders provided if the patient does not respond                  | 320         | N/A | N/A | Increasing numbers of reminders                            |                                                 | -0.018<br>0.041         | -0.047 – 0.011<br>0.002 – 0.079  | 0.225<br>0.038 | 309                |
| Vaccination is offered before 8am                                             | 395         | 295 | N/A | No                                                         | Yes                                             | 0.014<br>-0.032         | -0.041 – 0.069<br>-0.111 – 0.048 | 0.625<br>0.434 | 596                |
| Vaccination is offered after 6pm                                              | 395         | 295 | N/A | No                                                         | Yes                                             | 0.015<br>0.011          | -0.030 – 0.061<br>-0.054 – 0.077 | 0.506<br>0.733 | 595                |
| Vaccination is offered at weekends                                            | 395         | 295 | N/A | No                                                         | Yes                                             | -0.005<br>0.003         | -0.054 – 0.044<br>-0.996 – 0.105 | 0.834<br>0.961 | 594                |
| Local midwives recommend vaccine to pregnant women                            | 369         | N/A | N/A | Do not agree                                               | Agree                                           | 0.050                   | -0.087 – 0.187                   | 0.474          | 356                |
| Local midwives provide vaccine to pregnant women                              | 376         | NA  | NA  | Do not agree                                               | Agree                                           | 0.178                   | 0.024 – 0.333                    | 0.023          | 356                |
| Vaccination campaign is stopped when QOF targets are reached                  | 565         | 334 | 106 | No                                                         | Yes                                             | 0.078<br>0.070          | 0.001 – 0.155<br>-0.014 – 0.153  | 0.048<br>0.100 | 791                |
| How flu vaccination uptake rates are reviewed                                 | 565         | 334 | 106 | No written report                                          | Written report                                  | 0.057<br>0.119          | 0.016 – 0.098<br>0.044 – 0.195   | 0.006<br>0.002 | 791                |
| How the practice flu vaccination strategy is reviewed                         | 543         | N/A | 87  | No written report                                          | Written report                                  | 0.076<br>0.175          | -0.005 – 0.158<br>0.019 – 0.330  | 0.067<br>0.028 | 559                |
| Staff encourage colleagues to receive vaccination                             | 350         | 253 | 106 | Do not agree                                               | Agree                                           | 0.079<br>0.055          | 0.026 – 0.132<br>-0.030 – 0.139  | 0.004<br>0.208 | 575                |
| Staff themselves happy to have the flu vaccine                                | 347         | 253 | 106 | Do not agree                                               | Agree                                           | 0.019<br>0.060          | -0.029 – 0.067<br>-0.029 – 0.149 | 0.440<br>0.185 | 574                |

1  
2  
3  
4  
5  
6  
7  
8  
9  
10  
11  
12  
13  
14  
15  
16  
17  
18  
19  
20  
21  
22  
23  
24  
25  
26  
27  
28  
29  
30  
31  
32  
33  
34  
35  
36  
37  
38  
39  
40  
41  
42  
43  
44  
45  
46  
47

For peer review only

STROBE 2007 (v4) Statement—Checklist of items that should be included in reports of *cross-sectional studies*

| Section/Topic                | Item # | Recommendation                                                                                                                                                                       | Reported on page # |
|------------------------------|--------|--------------------------------------------------------------------------------------------------------------------------------------------------------------------------------------|--------------------|
| Title and abstract           | 1      | (a) Indicate the study's design with a commonly used term in the title or the abstract                                                                                               | 1                  |
|                              |        | (b) Provide in the abstract an informative and balanced summary of what was done and what was found                                                                                  | 3                  |
| <b>Introduction</b>          |        |                                                                                                                                                                                      |                    |
| Background/rationale         | 2      | Explain the scientific background and rationale for the investigation being reported                                                                                                 | 6                  |
| Objectives                   | 3      | State specific objectives, including any prespecified hypotheses                                                                                                                     | 7                  |
| <b>Methods</b>               |        |                                                                                                                                                                                      |                    |
| Study design                 | 4      | Present key elements of study design early in the paper                                                                                                                              | 8                  |
| Setting                      | 5      | Describe the setting, locations, and relevant dates, including periods of recruitment, exposure, follow-up, and data collection                                                      | 8                  |
| Participants                 | 6      | (a) Give the eligibility criteria, and the sources and methods of selection of participants                                                                                          | 8                  |
| Variables                    | 7      | Clearly define all outcomes, exposures, predictors, potential confounders, and effect modifiers. Give diagnostic criteria, if applicable                                             | 8,9,35,36          |
| Data sources/<br>measurement | 8*     | For each variable of interest, give sources of data and details of methods of assessment (measurement). Describe comparability of assessment methods if there is more than one group | 9                  |
| Bias                         | 9      | Describe any efforts to address potential sources of bias                                                                                                                            | 9                  |
| Study size                   | 10     | Explain how the study size was arrived at                                                                                                                                            | NA                 |
| Quantitative variables       | 11     | Explain how quantitative variables were handled in the analyses. If applicable, describe which groupings were chosen and why                                                         | 9                  |
| Statistical methods          | 12     | (a) Describe all statistical methods, including those used to control for confounding                                                                                                | 9                  |
|                              |        | (b) Describe any methods used to examine subgroups and interactions                                                                                                                  | 8,9,32,33          |
|                              |        | (c) Explain how missing data were addressed                                                                                                                                          | 8,9,35,36          |
|                              |        | (d) If applicable, describe analytical methods taking account of sampling strategy                                                                                                   | NA                 |
|                              |        | (e) Describe any sensitivity analyses                                                                                                                                                | NA                 |
| <b>Results</b>               |        |                                                                                                                                                                                      |                    |

|                          |     |                                                                                                                                                                                                              |             |
|--------------------------|-----|--------------------------------------------------------------------------------------------------------------------------------------------------------------------------------------------------------------|-------------|
| Participants             | 13* | (a) Report numbers of individuals at each stage of study—eg numbers potentially eligible, examined for eligibility, confirmed eligible, included in the study, completing follow-up, and analysed            | 8,11,36     |
|                          |     | (b) Give reasons for non-participation at each stage                                                                                                                                                         | NA          |
|                          |     | (c) Consider use of a flow diagram                                                                                                                                                                           | NA          |
| Descriptive data         | 14* | (a) Give characteristics of study participants (eg demographic, clinical, social) and information on exposures and potential confounders                                                                     | 11,32,33    |
|                          |     | (b) Indicate number of participants with missing data for each variable of interest                                                                                                                          | NA          |
| Outcome data             | 15* | Report numbers of outcome events or summary measures                                                                                                                                                         | 11-15,35,36 |
| Main results             | 16  | (a) Give unadjusted estimates and, if applicable, confounder-adjusted estimates and their precision (eg, 95% confidence interval). Make clear which confounders were adjusted for and why they were included | 11-15,35,36 |
|                          |     | (b) Report category boundaries when continuous variables were categorized                                                                                                                                    | 35,36       |
|                          |     | (c) If relevant, consider translating estimates of relative risk into absolute risk for a meaningful time period                                                                                             | NA          |
| Other analyses           | 17  | Report other analyses done—eg analyses of subgroups and interactions, and sensitivity analyses                                                                                                               | 11-15,35,36 |
| <b>Discussion</b>        |     |                                                                                                                                                                                                              |             |
| Key results              | 18  | Summarise key results with reference to study objectives                                                                                                                                                     | 16,18       |
| Limitations              | 19  | Discuss limitations of the study, taking into account sources of potential bias or imprecision. Discuss both direction and magnitude of any potential bias                                                   | 16          |
| Interpretation           | 20  | Give a cautious overall interpretation of results considering objectives, limitations, multiplicity of analyses, results from similar studies, and other relevant evidence                                   | 16-18       |
| Generalisability         | 21  | Discuss the generalisability (external validity) of the study results                                                                                                                                        | 16-18       |
| <b>Other information</b> |     |                                                                                                                                                                                                              |             |
| Funding                  | 22  | Give the source of funding and the role of the funders for the present study and, if applicable, for the original study on which the present article is based                                                | 19          |

\*Give information separately for cases and controls in case-control studies and, if applicable, for exposed and unexposed groups in cohort and cross-sectional studies.

**Note:** An Explanation and Elaboration article discusses each checklist item and gives methodological background and published examples of transparent reporting. The STROBE checklist is best used in conjunction with this article (freely available on the Web sites of PLoS Medicine at <http://www.plosmedicine.org/>, Annals of Internal Medicine at <http://www.annals.org/>, and Epidemiology at <http://www.epidem.com/>). Information on the STROBE Initiative is available at [www.strobe-statement.org](http://www.strobe-statement.org).



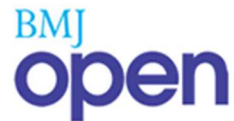

**Seven steps to Increase Influenza Vaccination Rates:  
Outcomes of a Nationwide Cross-sectional Survey of  
Strategies used in UK General Practice**

|                                 |                                                                                                                                                                                                                                                                                                                                                               |
|---------------------------------|---------------------------------------------------------------------------------------------------------------------------------------------------------------------------------------------------------------------------------------------------------------------------------------------------------------------------------------------------------------|
| Journal:                        | <i>BMJ Open</i>                                                                                                                                                                                                                                                                                                                                               |
| Manuscript ID:                  | bmjopen-2011-000851.R1                                                                                                                                                                                                                                                                                                                                        |
| Article Type:                   | Research                                                                                                                                                                                                                                                                                                                                                      |
| Date Submitted by the Author:   | 08-Mar-2012                                                                                                                                                                                                                                                                                                                                                   |
| Complete List of Authors:       | Dexter, Laura; University of Sheffield, Department of Infection and Immunity<br>Teare, M; University of Sheffield, School of Health and Related Research<br>Dexter, Matthew; Retford Health,<br>Siriwardena, Aloysius; University of Lincoln, School of Health and Social Care<br>Read, Robert; University of Sheffield, Department of Infection and Immunity |
| <b>Primary Subject Heading</b>: | General practice / Family practice                                                                                                                                                                                                                                                                                                                            |
| Secondary Subject Heading:      | Evidence based practice, Infectious diseases, Public health                                                                                                                                                                                                                                                                                                   |
| Keywords:                       | PRIMARY CARE, VIROLOGY, VACCINATION                                                                                                                                                                                                                                                                                                                           |
|                                 |                                                                                                                                                                                                                                                                                                                                                               |

SCHOLARONE™  
Manuscripts

only

**TITLE:**

Seven steps to Increase Influenza Vaccination Rates:

Outcomes of a Nationwide Survey of Strategies used in UK General Practice

**AUTHORS:**

Laura J Dexter, M Dawn Teare, Matthew Dexter, A Niroshan Siriwardena, Robert C Read

**AUTHORS' ADDRESSES AND POSITIONS:**

Academic Unit of Immunology and Infectious Diseases, Department of Infection and Immunity, The University of Sheffield Medical School, Beech Hill Road, Sheffield, S10 2RX, United Kingdom

Laura J Dexter

NIHR Clinical Lecturer in Virology

Health Services Research, School of Health and Related Research, University of Sheffield, Regent Court, 30 Regent Street, Sheffield, S1 4DA, United Kingdom

M Dawn Teare

Lecturer in Medical Epidemiology

Retford Health, Retford Primary Care Centre, North Road, Retford, DN22 7XF, United Kingdom

Matthew Dexter

General Practitioner

Lincoln School of Health and Social Care, University of Lincoln, Brayford Pool, Lincoln, LN6 7TS, United Kingdom

1  
2  
3 A Niroshan Siriwardena

4  
5 Professor of Primary and Pre-hospital Health Care

6  
7  
8  
9 Department of Infection and Immunity, The University of Sheffield Medical School, Beech Hill Road

10  
11 Sheffield, S10 2RX, United Kingdom

12  
13 Robert C Read [guarantor]

14  
15 Professor of Infectious Diseases

16  
17  
18  
19  
20 Correspondence to: L J Dexter [l.dexter@sheffield.ac.uk](mailto:l.dexter@sheffield.ac.uk)

21  
22  
23  
24  
25 The Corresponding Author has the right to grant on behalf of all authors and does grant on behalf of  
26  
27 all authors, an exclusive licence (or non exclusive for government employees) on a worldwide basis to  
28  
29 the BMJ Publishing Group Ltd and its licensees, to permit this article (if accepted) to be published in  
30  
31 BMJ editions and any other BMJPG products and to exploit all subsidiary rights, as set out in our  
32  
33 licence (<http://resources.bmj.com/bmj/authors/checklists-forms/licence-for-publication>).

## ABSTRACT

### *Objective*

To identify practice strategies associated with higher flu vaccination rates in primary care.

### *Design*

Logistic regression analysis of data from a cross-sectional online questionnaire

### *Setting*

795 general practices across England

### *Participants*

569 practice managers, 335 nursing staff and 107 GPs

### *Primary outcome measures*

Flu vaccination rates achieved by each practice in different groups of at-risk patients.

### *Secondary outcome measures*

~~Practice level deprivation and ethnicity data; QOF summary scores~~

### *Results*

Seven independent factors associated with higher vaccine uptake were identified. Having a lead staff member for planning the flu campaign and producing a written report of practice performance predicted an 8% higher vaccination rate for at-risk patients aged <65 years (OR 1.37; 95% CI 1.10 to 1.71). These strategies, plus sending a personal invitation to all eligible patients and only stopping vaccination when QOF targets are reached, predicted a 7% higher vaccination rate (OR 1.45; 95% CI 1.10 to 1.92) in patients ≥65 years. Using a lead member of staff for identifying eligible patients, with

1  
2  
3 either a modified manufacturer's or in-house search program for interrogating the practice IT system,  
4  
5 independently predicted a 4% higher vaccination rate in patients aged  $\geq 65$  years (OR 1.22; 95% CI  
6  
7 1.06 to 1.41 / OR 1.20; 95% CI 1.03 to 1.40). The provision of flu vaccine by midwives was associated  
8  
9 with a 4% higher vaccination rate in pregnant women (OR 1.19; 1.02 to 1.40).  
10

### 11 12 13 14 *Conclusion*

15  
16 Clear leadership, effective communication about performance, and methods used to identify and  
17  
18 contact eligible patients were independently associated with significantly higher rates of flu  
19  
20 vaccination. Financial targets appear to incentivise practices to work harder to maximise seasonal  
21  
22 influenza vaccine uptake. The strategies identified here could help primary care providers to  
23  
24 substantially increase their seasonal flu vaccination rates towards or even above the CMO's targets.  
25  
26  
27  
28  
29  
30  
31  
32  
33  
34  
35  
36  
37  
38  
39  
40  
41  
42  
43  
44  
45  
46  
47  
48  
49  
50  
51  
52  
53  
54  
55  
56  
57  
58  
59  
60

## ARTICLE SUMMARY

### *Article focus*

- Uptake of seasonal influenza vaccination in the UK's at-risk population is below the national and international target of 75%.
- Evidence-based guidance, to advise practices how to optimise all aspects of their flu vaccination campaigns and maximise their likelihood of protecting at-risk patients against flu and its serious sequelae, is greatly needed.
- This study sought to identify which strategies and procedures were associated with higher rates of flu vaccine uptake.

### *Key messages*

- This study has identified seven key strategies that were significantly associated with the success of practices' seasonal flu vaccination campaigns.
- If widely implemented by GP practices, average vaccination rates would be predicted to rise by 7-8% (thereby exceeding the WHO target in patients >65 years).

### *Strengths and limitations of this study*

- The study sample was large and representative, despite a participation rate of only 27.5%.
- Outcome measures (vaccination rates) were objective and corrected for practice size.
- Strategies used to provide and encourage vaccination were self-reported.

## INTRODUCTION

### *Influenza*

Influenza (flu) is a common, potentially severe, but preventable infection that places a high burden on patients and healthcare providers<sup>1-3</sup>. A safe and effective inactivated (killed) vaccine is produced ahead of each flu season, based on strain recommendations provided by the World Health Organisation (WHO), and is offered to at-risk groups in the UK free of charge<sup>4-7</sup>. These groups have been chosen based on evidence showing increased risk of severe flu infection or sequelae: epidemiological data from 2010-2011 indicated that patients in a risk group due to chronic disease had a 10-fold greater risk of mortality due to influenza, compared to those who were not in an at-risk group<sup>1</sup>. During the 2010-2011 flu season 602 deaths in the UK were due directly to influenza<sup>1</sup>. Of those who died, approximately two-thirds were in a clinical risk group that is targeted for vaccination, while only 25% had received vaccination for that season.

WHO guidance indicates that developed countries should achieve 75% influenza vaccine coverage in the elderly, while the European Union Council (EC) advises that members should aim to vaccinate 75% of all those at high risk from influenza infection<sup>8,9</sup>. England's Chief Medical Officer (CMO) has instructed that, in 2011-12, each practice should aim to reach or exceed 75% uptake for people aged 65 years or over, and 60% uptake for at-risk people under age 65 (increasing to 75% by 2013/14)<sup>7</sup>. Published data suggests that approximately 27% of England's population was eligible for free flu vaccination in 2010<sup>10,11</sup>. Providing seasonal influenza vaccination is a large and complex task which is performed well in the UK, in comparison to many other European countries<sup>12</sup>. Over 10 million patients were vaccinated in England in the 2010-11 season: each general practice vaccinating an average of approximately 1000 patients, mostly within a period of 4-6 weeks. The proportion of people aged over 65 years in England who received the 2010/11 influenza vaccine was, at 72.8%, just below the target of 75%<sup>10</sup>. However, both past and current rates of vaccination in the under-65 at-risk groups fall far short of the EC or CMO targets: during 2010/11 the rate achieved was 50.4%; in

1  
2 pregnant women who were not otherwise at risk it was only 36.6%, despite increasing evidence  
3 showing the beneficial effects of protection against flu for both mothers and babies<sup>10 13-15</sup>.  
4  
5  
6  
7

8  
9 A few previous studies have investigated the utility of specific interventions (such as telephone calls  
10 or letters) to generate an increase in uptake, but an optimal overall strategy for primary care  
11 providers remains undefined<sup>16 17</sup>. In this study, we aimed to investigate the entire process of flu  
12 vaccine provision in a wide range of UK general practices, in order to determine the correlates of  
13 higher vaccine uptake and to inform comprehensive, evidence-based recommendations for best  
14  
15  
16  
17  
18  
19  
20  
21  
22  
23  
24  
25  
26  
27  
28  
29  
30  
31  
32  
33  
34  
35  
36  
37  
38  
39  
40  
41  
42  
43  
44  
45  
46  
47  
48  
49  
50  
51  
52  
53  
54  
55  
56  
57  
58  
59  
60 practice.

Peer review only



## METHODS

### *Survey development*

Individual or small-group interviews with GPs, nurses and practice managers from six practices already achieving high rates of flu vaccination in urban (city), semi-rural (market town) and rural (village) areas were carried out, during which staff were asked to identify the factors considered by practices in designing and carrying out their flu vaccination campaigns. The information gained was used to construct three online questionnaires (one each for the participating groups of GPs, practice managers and practice nurses), using the Survey Monkey web-based software<sup>18</sup>. The format of the questions and the layout of the questionnaires were designed to optimise the statistical utility of the data to be collected. The questionnaires were piloted in the same six practices to further ascertain relevance and usability before final distribution.

### *Questionnaire distribution and survey participants*

We aimed to distribute the questionnaires to all registered GPs, practice nursing staff and practice managers within four Strategic Health Authorities (SHAs) (East Midlands, London, West Midlands and Yorkshire and Humber), which together provide care for approximately 40% of the UK population.

Details about the survey were sent via the Public Health teams in the participating SHAs ~~and Primary Care Trusts (PCTs)~~, who were requested to cascade the information to all members of individual primary care teams (GPs, nurses and practice managers) in their area via normal electronic information circulation mechanisms. The same method was used for all other communications with practice staff participants during the study. A preliminary e-mail, containing a letter informing primary care teams about the forthcoming study, was distributed two weeks before the first survey invitation. Two emails, inviting participation in the survey and containing web links to the online questionnaires, were then distributed in two consecutive weeks during August 2011.

### *Vaccine uptake data and other comparators*

The Immform web service, which is a UK Department of Health website for collecting vaccination data from general practices, was used to obtain practice-level flu vaccination uptake data for the period 1<sup>st</sup> September 2010 – 28<sup>th</sup> February 2011<sup>19</sup>. Actual numbers vaccinated and actual numbers eligible were recorded for 65+ year olds and at-risk ~~groups of~~ <65 year olds (including pregnant women). These are standard groups used for targeting and measuring influenza vaccine uptake by the WHO), in addition to data showing the. Total practice population size was also recorded. Other practice-level data, including summary Quality and Outcomes Framework (QOF) scores (most recent data available, for April 2009-March 2010) and a variety of demographic measures, were obtained in order to identify and/or adjust for other factors which may differentially affect vaccine uptake rates (such as overall practice quality performance, practice size, population ethnicity or population deprivation)<sup>20 21</sup>. QOF is a programme of annual financial rewards for GP surgeries, which forms part of the GP contract in England and Wales<sup>22</sup>. The above information was linked to the questionnaire responses by NHS practice code (a unique six-figure identifier); codes were then removed from the dataset prior to analysis.

### *Statistical analyses*

~~In analysing the responses to the questionnaires, we sought to identify: differences in routine strategies and procedures in flu vaccination campaigns within the different areas surveyed; whether and how these were associated with vaccine uptake rates; and other co-factors associated with vaccine uptake rates.~~ In addition to a full descriptive analysis of the variables recorded in the questionnaires, logistic regression analyses were performed using STATA to compare the proportions of patients vaccinated across different categorical responses in the survey questionnaire. The logistic regression was based upon absolute numbers of patients vaccinated out of the total at-risk, to account for differences in at-risk practice population size. Potentially confounding variables, such as total practice size, Index of Multiple deprivation and proportion white ethnicity, were analysed for

1  
2  
3 [correlation with vaccination uptake and adjusted for in the univariable analyses where appropriate.](#)

4  
5 As there was not always complete agreement between responses from different participants in the  
6  
7 same practice, robust standard errors were computed using a cluster correction model, thereby  
8  
9 generating data corrected to the practice level. Multivariate regression analysis was [then](#) performed  
10  
11 on any 2 or more results from the same [groupsubset\(s\)](#) of participants ([i.e. practice managers, nurses](#)  
12  
13 [and/or GPs](#)) which showed significance at the 95% level on univariable analysis. ~~We then used the~~  
14  
15 ~~outcomes of these statistical analyses to identify and evaluate the best strategies for carrying out~~  
16  
17 ~~successful and effective flu vaccination campaigns and how (or indeed whether) these may be broadly~~  
18  
19 ~~or specifically adopted.~~  
20  
21  
22  
23  
24  
25  
26  
27  
28  
29  
30  
31  
32  
33  
34  
35  
36  
37  
38  
39  
40  
41  
42  
43  
44  
45  
46  
47  
48  
49  
50  
51  
52  
53  
54  
55  
56  
57  
58  
59  
60

## RESULTS

Fifty PCTs distributed the survey invitation to a total of 2896 practices. Responses were submitted by 569 practice managers, 335 nursing staff and 107 GPs, representing 795 practices (27.5% of those invited to contribute). These practices serve a total of approximately 5.8 million patients, among whom over 1.5 million are eligible for influenza vaccination. The distributions of flu vaccination rates in the surveyed practices were well matched to national patterns (Figure 1). For the majority of eligible patients (i.e. those aged 65 years and above), our findings indicated that the variation between practices' flu vaccination rates was not influenced by differences in the ethnicity or affluence of their patient populations, whereas Quality and Outcomes Framework summary scores showed highly and significant positive correlations with vaccine uptake achieved in both age groups (supplementary table 1). The univariable logistic regression results referred to throughout this section are shown in supplementary table 2.

### *Staffing*

Having a lead member of staff for arranging the practice flu vaccination campaign was associated with increased flu vaccine uptake rates in both 65+ and <65 age groups ( $p = 0.001$  and  $0.004$  respectively). Nominating a staff member with responsibility for identifying eligible patients was associated with increased uptake of vaccine in older age groups ( $p = 0.038$ ), but this trend, although present, did not reach significance in under 65s ( $p = 0.218$ ).

### *Ordering vaccine*

A plot of the number of vaccine doses ordered for 2011-12 versus vaccines used in 2010-11 shows a tight correlation (figure 2a). On average, practices were found to have ordered vaccines based on the number of doses given in the previous season, with an average uplift of 8.8% (95% confidence interval 4.3 – 13.3%;  $n = 568$ ). As vaccines are ordered as a total, these data could not be differentiated into

1  
2  
3 doses intended for vaccination of patients aged over or under 65 years old. However, the data  
4  
5 showed that only 78.3% of responding practices would have been able to vaccinate at least 75% of  
6  
7 their at-risk patients (in accordance with the CMO recommendations) (figure 2b).  
8  
9

### 10 11 12 *Contacting patients*

13  
14 Using personal invitations, either alone or in combination with general publicity, was significantly  
15  
16 associated with higher rates of vaccination. The use of personal invitations for all patients (not just  
17  
18 those who did not respond to an initial general publicity campaign) was associated with the highest  
19  
20 vaccination rates in the larger, 65+ age group ( $p = 0.003$ ), although a similar association did not reach  
21  
22 statistical significance in the under 65s. Using both letters and telephone calls was not associated with  
23  
24 significantly different vaccination rates than using either letters or phone calls alone ( $p = 0.721$  for  
25  
26 patients aged 65+;  $p = 0.852$  for patients aged <65).  
27  
28  
29  
30  
31  
32

### 33 *Identifying eligible patients*

34  
35 Programmes for identifying eligible patients from the practices' IT system are usually issued by the  
36  
37 software providers. Modifying the IT supplier's standard search or creating a separate in-house search  
38  
39 was associated with significantly higher uptake rates for patients aged 65+ than using an unmodified  
40  
41 IT supplier's search ( $p < 0.001$  and  $0.027$ , respectively). A similar trend for under 65s did not reach  
42  
43 statistical significance, perhaps due to insufficient power. As older patients are identified simply on  
44  
45 the basis of their age at a certain date, which should not require a complicated search strategy, these  
46  
47 findings suggest that creating or modifying a system search reflects that the staff in these practices  
48  
49 are more motivated and/or experienced to use their IT system to try to achieve their flu vaccination  
50  
51 targets.  
52  
53  
54  
55  
56  
57  
58  
59  
60

### *Offering clinics and appointments*

More than 95% of practices held the main vaccination sessions at their usual surgery premises and 75% held the main sessions during normal surgery hours. Most practices reported using a variety of appointment types and timings to provide flu vaccination. Surprisingly, in our data, offering vaccinations at weekends, or before 8am or after 6pm, was not associated with a significant difference in the vaccination uptake rates achieved. Increasing numbers of reminders or repeat invitations were associated with significantly increased vaccine uptake in the under 65 year olds ( $p = 0.038$ ), though not in those aged 65+. Significantly higher rates of vaccination (for under 65s) occurred in practices that identified appointments for flu vaccination using a specific Read ([computer identification](#)).code ( $p = 0.038$ ).

### *Vaccinating pregnant women*

The proportion of practices that reported that their community midwives recommended flu vaccination to pregnant women was disappointingly low (57.5%). Furthermore, there was a clear discrepancy between this figure and the proportion that reported that their community midwives actually administered vaccine (17.8%; see figure 3a). Our analysis demonstrated that practices where community midwives were active in administering flu vaccinations to pregnant patients achieved significantly higher rates of uptake in this particular at-risk group ( $p = 0.023$ ).

### *Ending and reviewing the campaign*

A total of 578 practices provided information on what influenced their decision to stop offering flu vaccination. Of major concern was the evidence that almost 50% of practices stopped offering flu vaccines partly, or solely, because they had exhausted their stock. Almost one third (28.9%) cited a financial factor in making their decision and the data showed that ending flu vaccination only once QOF targets had been reached was associated with increased uptake rates for those aged 65+ ( $p =$

0.048); in those aged under 65 this was only weakly significant ( $p = 0.100$ ), perhaps influenced by the smaller numbers of patients in this group. These results suggest that practices that focused on financial targets were motivated and/or organised to continue their efforts to vaccinate patients beyond the point at which other practices may stop. In support of this hypothesis, we found that patients whose vaccination would contribute to a QOF-related payment received an average of 42% (95% CI 33 to 51%) more reminders more than those who did not have a QOF-registered indication for vaccination ( $p < 0.001$ ).

Practices which produced a written report reviewing their flu vaccination rates achieved very significantly higher vaccination rates in both younger and older age groups, compared to those practices which did not produce a written report ( $p = 0.006$  for patients aged 65+;  $p = 0.002$  for patients aged <65 years). Similarly, reviewing the practice's flu vaccination strategy in a written format was also significantly associated with achieving higher rates of vaccination ( $p = 0.067$  for patients aged 65+;  $p = 0.028$  for patients aged <65 years). This finding suggests that that practices which produced written reports may have been able to organise more rigorous campaigns, and/or have had more well-informed and motivated staff, resulting in more effective performance.

#### *Personal motivations and attitudes of staff*

Figure 3b shows a summary of GPs', nurses' and practice managers' views of the flu vaccination campaign. There was a significant association between encouraging vaccination among colleagues and other staff and achieving higher rates of vaccine uptake in patients aged 65 or above ( $p = 0.004$ ), but not in those aged under 65 years ( $p = 0.208$ ). There was a trend for a similar association between positive attitudes of staff towards being vaccinated themselves and higher rates of patient vaccination in a practice, but this did not reach statistical significance in either the older or younger age group ( $p = 0.440$  and  $0.185$  respectively).

1  
2  
3 *Predicted impact of strategies to increase rates of influenza vaccination*  
4

5  
6 Seven factors were found to have significant, independent positive associations with flu vaccine  
7  
8 uptake levels following multivariable regression analysis (Tables 1a and 1b). For patients aged <65  
9  
10 years, having a lead member of staff for planning the flu campaign and producing a written report of  
11  
12 the practice's performance were associated with a combined odds ratio of 1.37, which predicts an 8%  
13  
14 higher flu vaccination rate for practices that employ these strategies compared to those that do not  
15  
16 (54% vs. 46%).  
17

18  
19 In patients aged 65 or over, a further two factors were also found to remain independently correlated  
20  
21 with increased rates of flu vaccination. These were sending a personal invitation to all eligible patients  
22  
23 and only stopping vaccination when QOF targets are reached. The overall odds ratio associated with  
24  
25 the implementation of all four strategies in this age group was 1.45, which predicts a 7% higher  
26  
27 vaccination rate in this age group when these strategies are used (78% vs. 71%).  
28

29  
30 The strategies of using a lead member of staff for identifying eligible patients and either a modified  
31  
32 manufacturer's search program or an in-house search program for interrogating the practice IT  
33  
34 system were also independently correlated with increased rates of flu vaccination in patients aged 65  
35  
36 years or more. However, the effect seen was weaker as this data is derived from a subset of  
37  
38 responses from practice managers only, suggesting a rise to 78% from a baseline of 74%.  
39

40  
41 The active involvement of midwives in providing flu vaccination was significantly associated with  
42  
43 higher levels of vaccine uptake in pregnant women but, as the only significant variable within this  
44  
45 group, the finding could not be included in a multivariable analysis. However, applying the odds ratio  
46  
47 of 1.20 predicted by the univariable analysis, our data indicates that the provision of vaccination by  
48  
49 midwives rather than GPs is associated with an increase in uptake rate to 45% in pregnant women  
50  
51 (from an observed average baseline vaccination rate of 41% in our cohort).  
52  
53  
54  
55  
56  
57  
58  
59  
60



## DISCUSSION

This study has identified seven factors which GPs might use to improve and maximise uptake of seasonal flu vaccine in at-risk patients. Many of these strategies are common sense and align with the empirical guidance given by the English and Scottish CMOs<sup>23 24</sup>, but our study provides the first statistical evidence to support the validity of such approaches. The study sample was large and appeared to be representative of the overall cohort, despite a participation rate of only 27.5%. Although we found no evidence for selection bias of participating practice staff, when the vaccination rates of participating practices were compared with national data, it remains possible that the responses of staff who completed the questionnaire did not reliably represent the views of all practice staff within those participating practices. However, most of our questions sought factual data rather than opinions and so this bias, if present, is likely to be limited.

[This study focused on identifying strategies and approaches that GPs might use or influence to improve vaccine uptake. However, numerous patient-related factors also affect flu vaccine uptake. Highly mobile or ethnically diverse populations may prove very difficult to contact and target for flu vaccination. It is also likely that a minority of patients will always refuse or miss vaccination, no matter how much GPs strive to provide it.](#)

Public perception of influenza as a significant threat to health and of vaccination as an effective preventative strategy is associated with higher uptake<sup>25</sup>. People who receive information about these factors from official health sources (particularly GPs or nurses in the primary care setting) and who think that others want them to be vaccinated are more likely to get vaccinated<sup>12 25 26</sup>. In line with this, flu vaccination uptake is greater among older people and others who make routine use of hospital and community care services<sup>27</sup>. Unsurprisingly, fear of side-effects of vaccination is a strong negative influence, while lack of general motivation and ignorance about the recommendations are other commonly reported barriers to both seasonal and pandemic vaccination<sup>28 29</sup>. However, when intensive recall stimuli and information are provided to at-risk patients, as few as 3.5% will refuse vaccination, suggesting that patient attitudes are malleable

1  
2 and should not present a barrier to achieving the CMO's aims <sup>30</sup>. Our results strongly support the  
3  
4 provision of personal invitations for all patients (in alternative languages and/or formats, if required),  
5  
6 as advised by the CMO <sup>23</sup>. However, we found little evidence of benefit from offering very early  
7  
8 (before 8am), late (after 6pm) or weekend appointments. This contradicts some current guidance <sup>23</sup>  
9  
10 and is likely to be of financial relevance for practices. Our findings with respect to the flu vaccination  
11  
12 of pregnant women are also important. Although administering flu vaccine is not part of the current  
13  
14 role of many midwives, it is logical that the ability both to discuss and to provide vaccination to  
15  
16 pregnant women would increase uptake in this risk group by removing the need for referral and  
17  
18 attendance at a separate clinic: our analyses now support this logic. However, if midwives were to  
19  
20 provide influenza vaccination outside of the practice setting, it would be essential for reliable records  
21  
22 of this to be transferred to the GP  
23  
24  
25

26  
27 The need for good communication with patients, to encourage the uptake of flu vaccination, is  
28  
29 axiomatic. However, several statistically significant outcomes of our analyses have not previously  
30  
31 been described and are directly or indirectly associated with the quality or extent of communication  
32  
33 *within* practices. The production of a written review of practice performance might be associated with  
34  
35 higher flu vaccination rates for a number of reasons. Production of such a report indicates that at  
36  
37 least one member of staff must be able to access and manipulate the relevant data using their  
38  
39 practice's computer systems, and is motivated to do so. Subsequent dissemination of the report  
40  
41 allows staff to become aware of their practice's performance and identify areas for improvement.  
42  
43 Only 20% of practices in our study produced a written report of vaccine uptake rates and this strategy  
44  
45 is not currently recommended in the CMO guidance for England. Our results also indicate that each  
46  
47 practice should nominate lead members of staff not only for organising the practice's influenza  
48  
49 vaccination campaign (as advised by the English and Scottish CMOs <sup>23,24</sup>, but also for identifying at-risk  
50  
51 patients from the practice database. This is supported by a recently published study from the US,  
52  
53 which suggested that effective use of electronic databases by a skilled data manager could increase  
54  
55 the rate of flu vaccination by over 10% <sup>31</sup>. Our study's findings also suggest that the effectiveness of a  
56  
57  
58  
59  
60

1  
2  
3 practice's flu vaccination campaign is increased when staff promote vaccination among themselves,  
4  
5 an effect which may arise from increased motivation for the campaign as a whole or through  
6  
7 communication of their positive attitude to at-risk patients. This supports the findings of previous  
8  
9 studies and should thus contribute to an increased impetus to encourage vaccination of staff <sup>32 33</sup>.

10  
11  
12 There is currently a significant financial risk for practices attempting to improve their vaccination  
13  
14 rates. As practices are only reimbursed on the basis of the number of vaccines administered, they  
15  
16 face a financial penalty if they buy more doses than are used and sale-or-return schemes are usually  
17  
18 limited to a few percent of the vaccine doses in the overall order. Perhaps as a result, we have found  
19  
20 that almost 50% of practices currently halt their vaccination campaigns due to exhaustion of vaccine  
21  
22 stocks. A central procurement strategy for flu vaccines, which has recently undergone consultation by  
23  
24 the Department of Health, should remove this financial stricture and allow practices to aim for much  
25  
26 higher vaccination rates without risking financial penalty <sup>34</sup>. However, this will also result in the loss of  
27  
28 a significant proportion of practices' funding for flu vaccination (i.e. that which is currently derived  
29  
30 from any discrepancy between tariff price and purchased price for the vaccine itself). Considerable  
31  
32 effort and resources are required to deliver a successful flu vaccination campaign, and our findings  
33  
34 indicate that practices' efforts can be influenced by financial motivations. The pursuit of QOF targets  
35  
36 for flu vaccination requires practice staff to be able to perform complex interrogations of their patient  
37  
38 database and to be aware of rates of vaccine uptake while the flu vaccination campaign is  
39  
40 progressing. Our data suggests that pursuing the QOF targets may motivate practices to maintain  
41  
42 vaccine stocks and encourage extra patients to receive vaccine. We would not advise that practices  
43  
44 should automatically stop vaccinating patients once their QOF targets have been attained. However,  
45  
46 our findings suggest that a scale of financially-supported targets applicable across all patient groups,  
47  
48 or the inclusion of flu vaccination of all at-risk patients in the QOF scheme, might be a powerful tool  
49  
50 to increase flu vaccine uptake.  
51  
52  
53  
54

55  
56 Current vaccines achieve around 50-80% protection against influenza and associated sequelae in at-  
57  
58 risk groups <sup>4 35-37</sup>. However, these efficacy rates do not translate into public health protection if the  
59  
60

1  
2  
3 vaccine is not delivered effectively to the communities that need it. With flu vaccination rates varying  
4  
5 from 15 to 100% (Figure 1) between the worst and best practices in our nationwide cohort, there is  
6  
7 the potential for enormous gains to be made. This study has identified seven simple steps that can  
8  
9 improve our performance and increase the protection of at-risk patients.  
10

11  
12  
13  
14  
15  
16  
17  
18  
19  
20  
21  
22  
23  
24  
25  
26  
27  
28  
29  
30  
31  
32  
33  
34  
35  
36  
37  
38  
39  
40  
41  
42  
43  
44  
45  
46  
47  
48  
49  
50  
51  
52  
53  
54  
55  
56  
57  
58  
59  
60

For peer review only

## ACKNOWLEDGEMENTS

This study was an independent report commissioned and funded by the Policy Research Programme in the Department of Health, UK (reference number 039/0035). The views expressed are not necessarily those of the Department. The study was sponsored and granted ethical approval by the University of Sheffield. We are grateful to the survey participants for taking part; to Dr Mark Ashworth, GP and Clinical Senior Lecturer at King's College London for providing the demographic and deprivation data; to Dr Helen Carter, Consultant in Public Health at NHS West Midlands, Dr Andrew Clark, Deputy Director of Public Health at NHS Yorkshire and Humber, Dr Giri Rajaratnam, Deputy Regional Director of Public Health at NHS East Midlands, Dr Leslyn Rew, Project Manager at NHS West Midlands and Dr Chloe Sellwood, Pandemic Flu Lead at NHS London and their Vaccination & Immunisation teams for arranging circulation of the survey details to primary care teams; to staff at Bridgegate, Crown House, Riverside, and Tall Trees Surgeries in Retford, Charnock Health Primary Care Centre in Sheffield, and Bawtry and Blyth Health Centre in Bawtry for feedback on questionnaire and guideline design; and to Mr Gerald Ellis, Business Manager at Retford Health for co-ordinating feedback.

Data sharing: the availability of additional data is subject to consent for its dissemination from the Department of Health Central Commissioning Facility. Neither the study sponsor nor the funder played any role in study design; in the collection, analysis, and interpretation of data; in the writing of the report; or in the decision to submit the article for publication. All authors had access to the study data (including statistical reports and tables) and can take responsibility for the integrity of the data and the accuracy of the data analysis.

Contributors: LJD designed, carried out and coordinated analysis and reporting of the study, and also drafted and revised this manuscript. MDT contributed to statistical aspects of design, carried out the

1  
2 formal data analysis and contributed to the manuscript. MD and ANS contributed to primary care and  
3  
4 policy aspects of study design and interpretation and also revised the manuscript. RCR contributed to  
5  
6 study design and interpretation and revised the manuscript. He is guarantor.  
7  
8  
9

10  
11 The Corresponding Author has the right to grant on behalf of all authors and does grant on behalf of  
12  
13 all authors, an exclusive licence (or non exclusive for government employees) on a worldwide basis to  
14  
15 the BMJ Publishing Group Ltd and its licensees, to permit this article (if accepted) to be published in  
16  
17 BMJ editions and any other BMJPG products and to exploit all subsidiary rights, as set out in our  
18  
19 licence (<http://resources.bmj.com/bmj/authors/checklists-forms/licence-for-publication>)  
20  
21  
22  
23

24  
25 All authors have completed the Unified Competing Interest form at [www.icmje.org/coi\\_disclosure.pdf](http://www.icmje.org/coi_disclosure.pdf)  
26  
27 (available on request from the corresponding author) and declare that (1) LJD, MDT, MD, ANS and  
28  
29 RCR have no support from companies for the submitted work; (2) LJD, MDT, MD, ANS and RCR have  
30  
31 no relationships with companies that might have an interest in the submitted work in the previous 3  
32  
33 years; (3) their spouses, partners, or children have no financial relationships that may be relevant to  
34  
35 the submitted work; and (4) LJD, MDT, MD, ANS and RCR have no non-financial interests that may be  
36  
37 relevant to the submitted work.  
38  
39  
40  
41  
42  
43  
44  
45  
46  
47  
48  
49  
50  
51  
52  
53  
54  
55  
56  
57  
58  
59  
60

## REFERENCES

1. Surveillance of influenza and other respiratory viruses in the UK 2010/11: Health Protection Agency, 2011.
2. Fleming DM, Elliot, A.J., Nguyen-Van-Tam, J.S., Watson, J.M., Wise, R. A Winter's Tale: coming to terms with winter respiratory illnesses: Health Protection Agency, 2005.
3. source: Mintel.
4. Pebody R, Hardelid P, Fleming D, et al. Effectiveness of seasonal 2010/11 and pandemic influenza A(H1N1)2009 vaccines in preventing influenza infection in the United Kingdom: mid-season analysis 2010/11. *Euro Surveill* 2011;16(6).
5. Mangtani P, Cumberland P, Hodgson CR, et al. A cohort study of the effectiveness of influenza vaccine in older people, performed using the United Kingdom general practice research database. *J Infect Dis* 2004;190(1):1-10.
6. Influenza [chapter 19]. *Immunisation against infectious disease*: Department of Health, UK, 2011.
7. Davies S. Letter from the CMO: Preparation and Assurance for 2011/12 Seasonal Influenza Immunisation Programme: Department of Health, 2011.
8. 56th World Health Assembly: Prevention and control of influenza pandemics and annual epidemics; 2003.
9. Council of the European Union. *Council Recommendation of 22 December 2009 on seasonal influenza vaccination (2009/1019/EU)*. *Official Journal of the European Union* 2009;348(71).
10. Begum F, Pebody R. Seasonal influenza vaccine uptake amongst GP patient groups in England, Winter season 2010-11: Department of Health, 2011.
11. Annual Mid-year Population Estimates, 2010: Office for National Statistics, 2011:6.
12. Blank PR, Schwenkglens M, Szucs TD. Vaccination coverage rates in eleven European countries during two consecutive influenza seasons. *J Infect* 2009;58(6):446-58.
13. Puleston RL, Bugg G, Hoschler K, et al. Observational study to investigate vertically acquired passive immunity in babies of mothers vaccinated against H1N1v during pregnancy. *Health Technol Assess* 2010;14(55):1-82.
14. Benowitz I, Esposito DB, Gracey KD, et al. Influenza vaccine given to pregnant women reduces hospitalization due to influenza in their infants. *Clin Infect Dis* 2010;51(12):1355-61.
15. Eick AA, Uyeki TM, Klimov A, et al. Maternal influenza vaccination and effect on influenza virus infection in young infants. *Arch Pediatr Adolesc Med* 2011;165(2):104-11.
16. Siriwardena AN, Rashid A, Johnson MR, et al. Cluster randomised controlled trial of an educational outreach visit to improve influenza and pneumococcal immunisation rates in primary care. *Br J Gen Pract* 2002;52(482):735-40.
17. Furey A, Robinson E, Young Y. Improving influenza immunisation coverage in 2000-2001: a baseline survey, review of the evidence and sharing of best practice. *Commun Dis Public Health* 2001;4(3):183-7.
18. [www.surveymonkey.com](http://www.surveymonkey.com).
19. [www.immform.dh.gov.uk](http://www.immform.dh.gov.uk).
20. Practice-level ethnicity and other demographic data for 2009 kindly provided by Dr Mark Ashworth, Department of Primary Care & Public Health Sciences, King's College London.
21. From: <http://www.ic.nhs.uk/statistics-and-data-collections/supporting-information/audits-and-performance/the-quality-and-outcomes-framework/qof-2009-10/data-tables>.
22. Gillam S, Siriwardena A. *The Quality and Outcomes Framework: QOF transforming general practice*. Oxford: Radcliffe Publishing Ltd., 2010.
23. Seasonal Flu Plan: Department of Health, 2011.
24. Seasonal Influenza and Pneumococcal Immunisation Programmes 2010-11 (letter); accessed at [http://www.sehd.scot.nhs.uk/cmo/CMO\(2010\)19.pdf](http://www.sehd.scot.nhs.uk/cmo/CMO(2010)19.pdf) Chief Medical Officer and Public Health Directorate, Scotland.

- 1
- 2
- 3 25. Bish A, Yardley L, Nicoll A, et al. Factors associated with uptake of vaccination against pandemic
- 4 influenza: A systematic review. *Vaccine* 2011.
- 5 26. Maurer J, Harris KM. Contact and communication with healthcare providers regarding influenza
- 6 vaccination during the 2009-2010 H1N1 pandemic. *Prev Med* 2011;52(6):459-64.
- 7 27. Crawford VL, O'Hanlon A, McGee H. The effect of patient characteristics upon uptake of the
- 8 influenza vaccination: a study comparing community-based older adults in two healthcare
- 9 systems. *Age Ageing* 2011;40(1):35-41.
- 10 28. Myers LB, Goodwin R. Determinants of adults' intention to vaccinate against pandemic swine flu.
- 11 *BMC Public Health* 2011;11(1):15.
- 12 29. Keenan H, Campbell J, Evans PH. Influenza vaccination in patients with asthma: why is the uptake
- 13 so low? *Br J Gen Pract* 2007;57(538):359-63.
- 14 30. Humiston SG, Bennett NM, Long C, et al. Increasing inner-city adult influenza vaccination rates: a
- 15 randomized controlled trial. *Public Health Rep* 2011;126 Suppl 2:39-47.
- 16 31. Loo TS, Davis RB, Lipsitz LA, et al. Electronic medical record reminders and panel management to
- 17 improve primary care of elderly patients. *Arch Intern Med* 2011;171(17):1552-8.
- 18 32. Abramson ZH, Levi O. Is performance of influenza vaccination in the elderly related to treating
- 19 physician's self immunization and other physician characteristics? *Prev Med* 2008;47(5):550-
- 20 3.
- 21 33. Nichol KL, Zimmerman R. Generalist and subspecialist physicians' knowledge, attitudes, and
- 22 practices regarding influenza and pneumococcal vaccinations for elderly and other high-risk
- 23 patients: a nationwide survey. *Arch Intern Med* 2001;161(22):2702-8.
- 24 34. A review of the procurement of seasonal flu vaccine 2011: Immunisation Branch, Department of
- 25 Health, 2011.
- 26 35. Schembri S, Morant S, Winter JH, et al. Influenza but not pneumococcal vaccination protects
- 27 against all-cause mortality in patients with COPD. *Thorax* 2009;64(7):567-72.
- 28 36. Jackson LA, Gaglani MJ, Keyserling HL, et al. Safety, efficacy, and immunogenicity of an inactivated
- 29 influenza vaccine in healthy adults: a randomized, placebo-controlled trial over two influenza
- 30 seasons. *BMC Infect Dis* 2010;10:71.
- 31 37. Osterholm MT, Kelley NS, Sommer A, et al. Efficacy and effectiveness of influenza vaccines: a
- 32 systematic review and meta-analysis. *Lancet Infect Dis* 2011.
- 33
- 34
- 35
- 36
- 37
- 38
- 39
- 40
- 41
- 42
- 43
- 44
- 45
- 46
- 47
- 48
- 49
- 50
- 51
- 52
- 53
- 54
- 55
- 56
- 57
- 58
- 59
- 60



1  
2  
3 *Figure 1*

4 Box and whisker plots showing the range and distribution of influenza vaccination uptake rates for  
5 patients aged 65 years + (blue boxes and bars) and at-risk patients aged under 65 years (red boxes  
6 and bars). The distribution of uptake rates for non-participating practices (N = 2101) and participating  
7 practices (N = 795) are not significantly different.  
8  
9  
10  
11  
12  
13  
14  
15  
16  
17  
18  
19  
20  
21  
22  
23  
24  
25  
26  
27  
28  
29  
30  
31  
32  
33  
34  
35  
36  
37  
38  
39  
40  
41  
42  
43  
44  
45  
46  
47  
48  
49  
50  
51  
52  
53  
54  
55  
56  
57  
58  
59  
60

For peer review only

1  
2  
3  
4  
5  
6  
7  
8  
9  
10  
11  
12  
13  
14  
15  
16  
17  
18  
19  
20  
21  
22  
23  
24  
25  
26  
27  
28  
29  
30  
31  
32  
33  
34  
35  
36  
37  
38  
39  
40  
41  
42  
43  
44  
45  
46  
47  
48  
49  
50  
51  
52  
53  
54  
55  
56  
57  
58  
59  
60

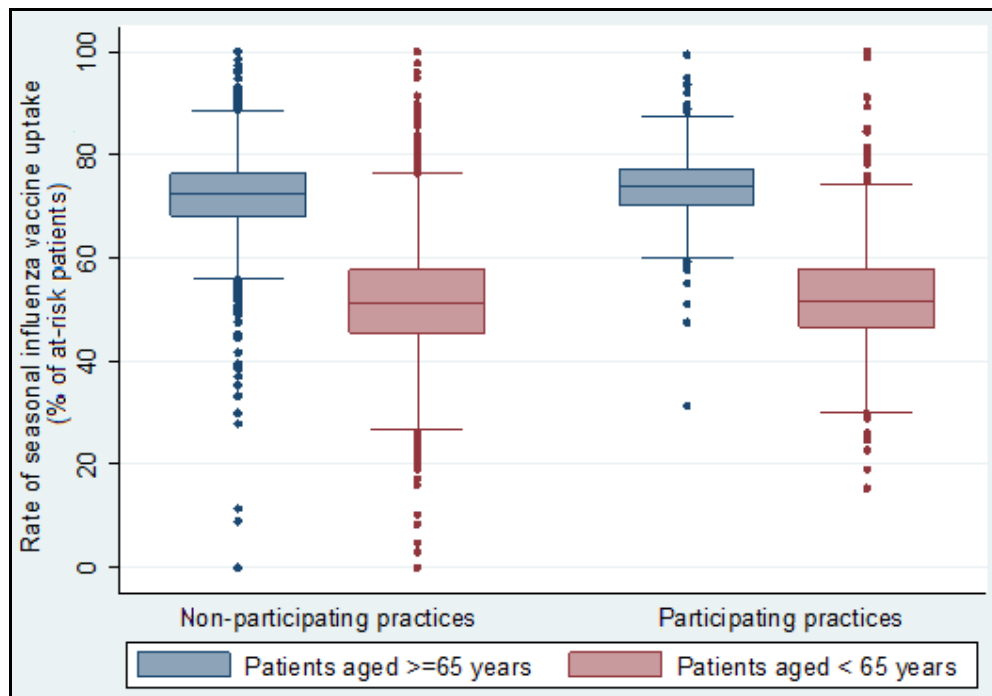

review only

1  
2  
3 *Figure 2*

4 (a) Relationship between reported total number of vaccine doses ordered for the 2011-2012 season  
5 and actual number of doses administered in 2010-2011 (n = 568), and (b) Plot showing the maximum  
6 average achievable vaccination rates for the 2011-2012 season, based on the total number of vaccine  
7 doses ordered and the total number of eligible patients. Red line indicates the CMO's target of 75%.  
8  
9  
10  
11  
12  
13  
14  
15  
16  
17  
18  
19  
20  
21  
22  
23  
24  
25  
26  
27  
28  
29  
30  
31  
32  
33  
34  
35  
36  
37  
38  
39  
40  
41  
42  
43  
44  
45  
46  
47  
48  
49  
50  
51  
52  
53  
54  
55  
56  
57  
58  
59  
60

For peer review only

1  
2  
3  
4  
5  
6  
7  
8  
9  
10  
11  
12  
13  
14  
15  
16  
17  
18  
19  
20  
21  
22  
23  
24  
25  
26  
27  
28  
29  
30  
31  
32  
33  
34  
35  
36  
37  
38  
39  
40  
41  
42  
43  
44  
45  
46  
47  
48  
49  
50  
51  
52  
53  
54  
55  
56  
57  
58  
59  
60

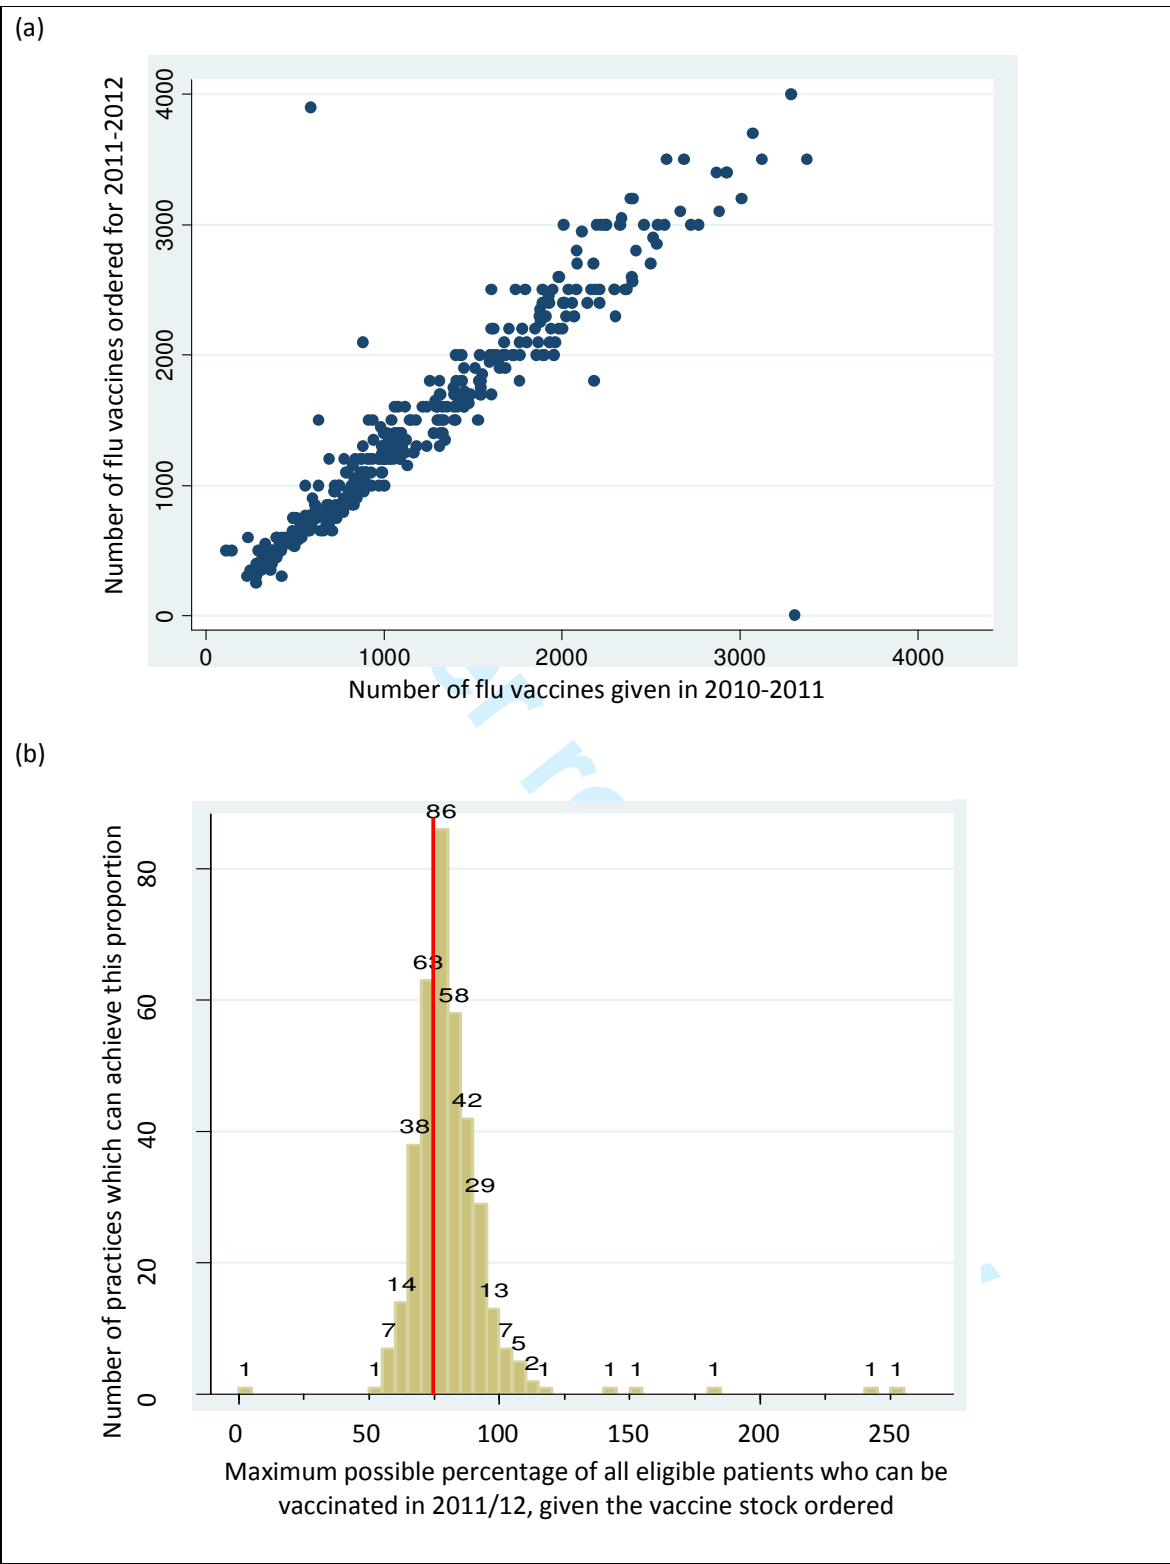

1  
2  
3  
4 *Figure 3*  
5  
6

7 Showing (a) the reported activity of community midwifery teams in recommending and providing  
8 seasonal influenza vaccination to pregnant women, and (b) the attitudes of participating healthcare  
9 workers to vaccination of colleagues and themselves  
10  
11  
12  
13  
14  
15  
16  
17  
18  
19  
20  
21  
22  
23  
24  
25  
26  
27  
28  
29  
30  
31  
32  
33  
34  
35  
36  
37  
38  
39  
40  
41  
42  
43  
44  
45  
46  
47  
48  
49  
50  
51  
52  
53  
54  
55  
56  
57  
58  
59  
60

For peer review only

1  
2  
3  
4  
5  
6  
7  
8  
9  
10  
11  
12  
13  
14  
15  
16  
17  
18  
19  
20  
21  
22  
23  
24  
25  
26  
27  
28  
29  
30  
31  
32  
33  
34  
35  
36  
37  
38  
39  
40  
41  
42  
43  
44  
45  
46  
47  
48  
49  
50  
51  
52  
53  
54  
55  
56  
57  
58  
59  
60

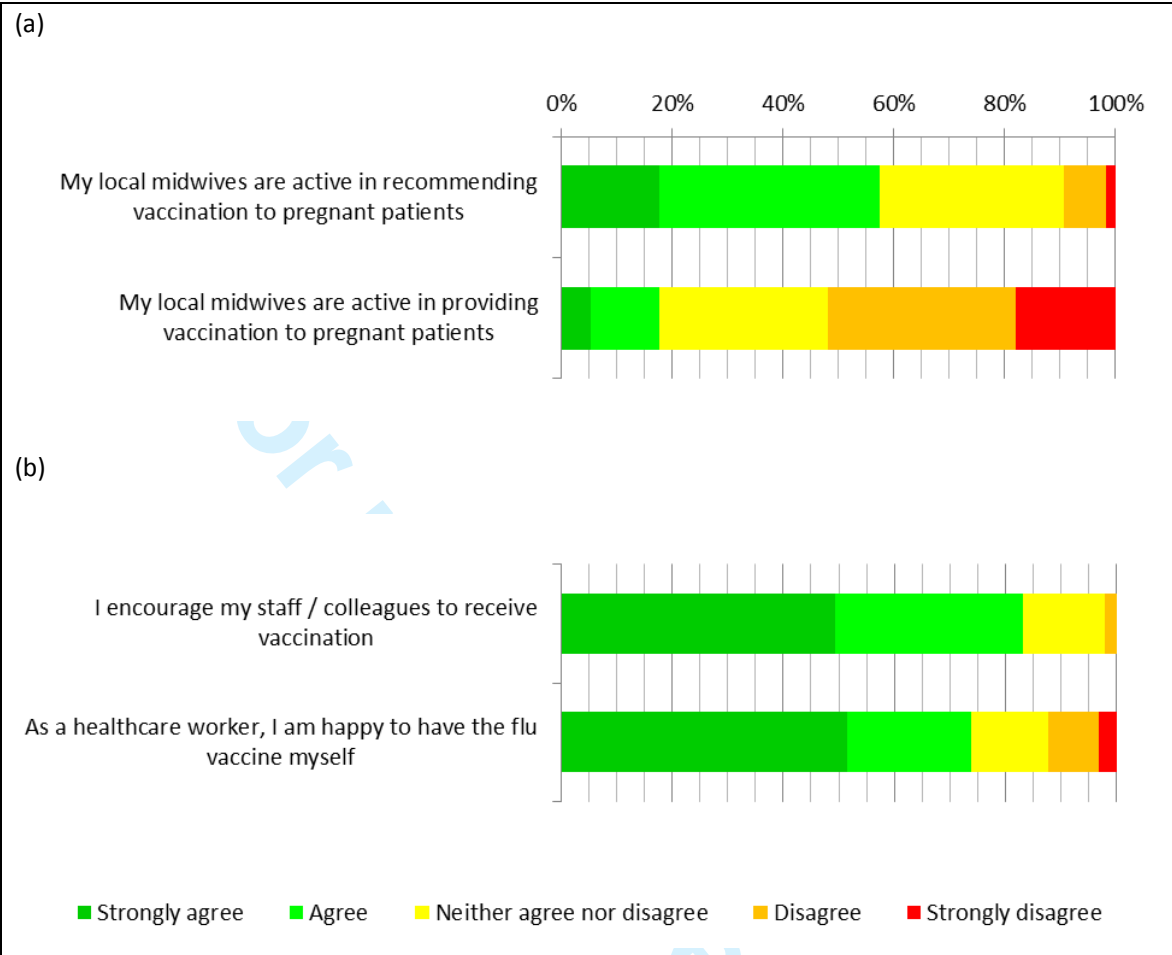

1  
2  
3 *Table 1a*

4  
5 | Statistically significant ~~results-factors~~ found on multivariate regression analysis of responses ~~from-common-to~~ all three types of staff (GPs, nursing staff and practice  
6 managers)  
7  
8  
9  
10  
11  
12  
13  
14  
15  
16  
17  
18  
19  
20  
21  
22  
23  
24  
25  
26  
27  
28  
29  
30  
31  
32  
33  
34  
35  
36  
37  
38  
39  
40  
41  
42  
43  
44  
45

For peer review only

1  
2  
3  
4  
5  
6  
7  
8  
9  
10  
11  
12  
13  
14  
15  
16  
17  
18  
19  
20  
21  
22  
23  
24  
25  
26  
27  
28  
29  
30  
31  
32  
33  
34  
35  
36  
37  
38  
39  
40  
41  
42  
43  
44  
45  
46  
47  
48  
49

| Description of significant factor                                                  | Regression co-efficient | 95% CI        | p-value | Number of clusters |
|------------------------------------------------------------------------------------|-------------------------|---------------|---------|--------------------|
| <i>For patients aged ≥65 years</i>                                                 |                         |               |         |                    |
| Producing a written report to review flu vaccine uptake rates                      | 0.065                   | 0.023 – 0.107 | 0.010   | 659                |
| Having a lead member of staff for planning the practice’s flu vaccination campaign | 0.144                   | 0.035 – 0.253 | 0.010   | 659                |
| Sending a personal invitation to all eligible patients                             | 0.081                   | 0.035 – 0.127 | 0.001   | 659                |
| Only stopping vaccination when QOF targets are reached                             | 0.085                   | 0.004 – 0.166 | 0.039   | 659                |
| <i>For at-risk patients aged &lt;65 years</i>                                      |                         |               |         |                    |
| Producing a written report to review flu vaccine uptake rates                      | 0.113                   | 0.042 – 0.184 | 0.002   | 783                |
| Having a lead member of staff for planning the practice’s flu vaccination campaign | 0.203                   | 0.054 – 0.352 | 0.008   | 783                |

review only



1  
2  
3 *Table 1b*

4  
5 | Statistically significant results-factors found on multivariate regression analysis of responses from practice managers only  
6  
7  
8  
9  
10  
11  
12  
13  
14  
15  
16  
17  
18  
19  
20  
21  
22  
23  
24  
25  
26  
27  
28  
29  
30  
31  
32  
33  
34  
35  
36  
37  
38  
39  
40  
41  
42  
43  
44  
45  
46  
47  
48  
49

For peer review only

1  
2  
3  
4  
5  
6  
7  
8  
9  
10  
11  
12  
13  
14  
15  
16  
17  
18  
19  
20  
21  
22  
23  
24  
25  
26  
27  
28  
29  
30  
31  
32  
33  
34  
35  
36  
37  
38  
39  
40  
41  
42  
43  
44  
45  
46  
47  
48  
49

| Description of significant factor                                                                            | Regression co-efficient | 95% CI        | p-value | Number of clusters |
|--------------------------------------------------------------------------------------------------------------|-------------------------|---------------|---------|--------------------|
| <i>For patients aged ≥65 years</i>                                                                           |                         |               |         |                    |
| Identifying eligible patients using a modified manufacturer’s search program                                 | 0.115                   | 0.056 – 0.175 | 0.000   | 395                |
| Identifying eligible patients using an in-house search program                                               | 0.096                   | 0.028 – 0.163 | 0.006   | 395                |
| Having a lead member of staff for identifying eligible patients in the practice                              | 0.086                   | 0.001 – 0.170 | 0.046   | 395                |
| <i>For at-risk patients aged &lt;65 years: no significant factors were identified by multiple regression</i> |                         |               |         |                    |

Peer review only

1  
2  
3 *Supplementary table 1*

4  
5 Showing results of linear regression analyses of relationship between seasonal flu vaccination uptake rates, for patients aged 65+ (clear cells) and patients aged under 65  
6  
7 (shaded cells), by ethnicity; deprivation; and Quality and Outcomes Framework summary scores [n = 795].  
8  
9  
10  
11  
12  
13  
14  
15  
16  
17  
18  
19  
20  
21  
22  
23  
24  
25  
26  
27  
28  
29  
30  
31  
32  
33  
34  
35  
36  
37  
38  
39  
40  
41  
42  
43  
44  
45  
46  
47  
48  
49

For peer review only

1  
2  
3  
4  
5  
6  
7  
8  
9  
10  
11  
12  
13  
14  
15  
16  
17  
18  
19  
20  
21  
22  
23  
24  
25  
26  
27  
28  
29  
30  
31  
32  
33  
34  
35  
36  
37  
38  
39  
40  
41  
42  
43  
44  
45  
46  
47  
48  
49

| Factor                                                | Regression coefficient | 95% confidence interval | p-value |
|-------------------------------------------------------|------------------------|-------------------------|---------|
| Increasing proportion of white ethnicity              | 0.015                  | -0.014 to 0.043         | 0.305   |
|                                                       | -0.140                 | -0.167 to -0.114        | <0.001  |
| Increasing index of multiple deprivation (IMD) score  | -0.0009                | -0.0015 to -0.0007      | <0.001  |
|                                                       | 0.0001                 | -0.0017 to 0.0004       | 0.380   |
| Increasing Quality and Outcomes Framework (QOF) score | 1.430                  | 1.299 to 1.561          | <0.001  |
|                                                       | 0.918                  | 0.781 to 1.054          | <0.001  |

Peer review only

1  
2  
3 *Supplementary table 2*

4  
5 Showing factor analysed, number of respondents, and results of logistic regression analyses of responses with respect to flu vaccination uptake rates in patients aged  
6  
7 65 years and over (clear boxes), uptake rates in patients aged under 65 years (shaded boxes) and uptake rates in otherwise healthy pregnant women (hatched boxes).  
8  
9 Calculations were performed using Stata and incorporate robust cluster adjustment to reflect the number of responding practices (where appropriate).  
10  
11  
12  
13  
14  
15  
16  
17  
18  
19  
20  
21  
22  
23  
24  
25  
26  
27  
28  
29  
30  
31  
32  
33  
34  
35  
36  
37  
38  
39  
40  
41  
42  
43  
44  
45  
46  
47  
48  
49

For peer review only

| Factor                                                                        | Respondents |     |     | Baseline                                                   | Comparator                                      | Regression co-efficient | 95% confidence interval | p-value | Number of clusters |
|-------------------------------------------------------------------------------|-------------|-----|-----|------------------------------------------------------------|-------------------------------------------------|-------------------------|-------------------------|---------|--------------------|
|                                                                               | PM          | PN  | GP  |                                                            |                                                 |                         |                         |         |                    |
| Lead member of staff for planning seasonal flu vaccination                    | 568         | 336 | 105 | Yes                                                        | No                                              | 0.185                   | 0.075 – 0.295           | 0.001   | 783                |
|                                                                               |             |     |     |                                                            |                                                 | 0.220                   | 0.069 – 0.371           | 0.004   |                    |
| Dedicated member of staff for identifying eligible patients                   | 414         | N/A | N/A | No                                                         | Yes                                             | 0.087                   | 0.005 – 0.169           | 0.038   | 397                |
|                                                                               |             |     |     |                                                            |                                                 | 0.080                   | -0.048 – 0.208          | 0.218   |                    |
| Use of a dedicated IT code to record appointment bookings for vaccination     | 414         | N/A | N/A | No                                                         | Yes                                             | 0.006                   | -0.054 – 0.066          | 0.844   | 380                |
|                                                                               |             |     |     |                                                            |                                                 | 0.092                   | 0.005 – 0.179           | 0.038   |                    |
| Methods used to encourage patients to attend for vaccination                  | 415         | 304 | 107 | General publicity only                                     | General publicity & personal invitation for all | 0.105                   | 0.032 – 0.177           | 0.005   | 662                |
|                                                                               |             |     |     |                                                            |                                                 | 0.010                   | -0.019 – 0.226          | 0.097   |                    |
|                                                                               |             |     |     | General publicity & personal invitation for non-responders | General publicity & personal invitation for all | 0.074                   | 0.025 – 0.124           | 0.003   | 595                |
|                                                                               |             |     |     |                                                            |                                                 | 0.042                   | -0.243 – 0.109          | 0.215   |                    |
| Personal invitation methods used to invite patients to attend for vaccination | 362         | N/A | N/A | Letter <i>or</i> telephone calls                           | Letter <i>and</i> telephone calls               | 0.011                   | -0.051 – 0.073          | 0.721   | 338                |
|                                                                               |             |     |     |                                                            |                                                 | -0.009                  | -0.107 – 0.882          | 0.852   |                    |
| Number of reminders provided if the patient does not respond                  | 320         | N/A | N/A | Increasing numbers of reminders                            |                                                 | -0.018                  | -0.047 – 0.011          | 0.225   | 309                |
|                                                                               |             |     |     |                                                            |                                                 | 0.041                   | 0.002 – 0.079           | 0.038   |                    |
| Vaccination is offered before 8am                                             | 395         | 295 | N/A | No                                                         | Yes                                             | 0.014                   | -0.041 – 0.069          | 0.625   | 596                |
|                                                                               |             |     |     |                                                            |                                                 | -0.032                  | -0.111 – 0.048          | 0.434   |                    |
| Vaccination is offered after 6pm                                              | 395         | 295 | N/A | No                                                         | Yes                                             | 0.015                   | -0.030 – 0.061          | 0.506   | 595                |
|                                                                               |             |     |     |                                                            |                                                 | 0.011                   | -0.054 – 0.077          | 0.733   |                    |
| Vaccination is offered at weekends                                            | 395         | 295 | N/A | No                                                         | Yes                                             | -0.005                  | -0.054 – 0.044          | 0.834   | 594                |
|                                                                               |             |     |     |                                                            |                                                 | 0.003                   | -0.996 – 0.105          | 0.961   |                    |
| Local midwives recommend vaccine to pregnant women                            | 369         | N/A | N/A | Do not agree                                               | Agree                                           | 0.050                   | -0.087 – 0.187          | 0.474   | 356                |
| Local midwives provide vaccine to pregnant women                              | 376         | NA  | NA  | Do not agree                                               | Agree                                           | 0.178                   | 0.024 – 0.333           | 0.023   | 356                |
| Vaccination campaign is stopped when QOF targets are reached                  | 565         | 334 | 106 | No                                                         | Yes                                             | 0.078                   | 0.001 – 0.155           | 0.048   | 791                |
|                                                                               |             |     |     |                                                            |                                                 | 0.070                   | -0.014 – 0.153          | 0.100   |                    |
| How flu vaccination uptake rates are reviewed                                 | 565         | 334 | 106 | No written report                                          | Written report                                  | 0.057                   | 0.016 – 0.098           | 0.006   | 791                |
|                                                                               |             |     |     |                                                            |                                                 | 0.119                   | 0.044 – 0.195           | 0.002   |                    |
| How the practice flu vaccination strategy is reviewed                         | 543         | N/A | 87  | No written report                                          | Written report                                  | 0.076                   | -0.005 – 0.158          | 0.067   | 559                |
|                                                                               |             |     |     |                                                            |                                                 | 0.175                   | 0.019 – 0.330           | 0.028   |                    |
| Staff encourage colleagues to receive vaccination                             | 350         | 253 | 106 | Do not agree                                               | Agree                                           | 0.079                   | 0.026 – 0.132           | 0.004   | 575                |
|                                                                               |             |     |     |                                                            |                                                 | 0.055                   | -0.030 – 0.139          | 0.208   |                    |
| Staff themselves happy to have the flu vaccine                                | 347         | 253 | 106 | Do not agree                                               | Agree                                           | 0.019                   | -0.029 – 0.067          | 0.440   | 574                |
|                                                                               |             |     |     |                                                            |                                                 | 0.060                   | -0.029 – 0.149          | 0.185   |                    |

1  
2  
3  
4  
5  
6  
7  
8  
9  
10  
11  
12  
13  
14  
15  
16  
17  
18  
19  
20  
21  
22  
23  
24  
25  
26  
27  
28  
29  
30  
31  
32  
33  
34  
35  
36  
37  
38  
39  
40  
41  
42  
43  
44  
45  
46  
47  
48  
49

For peer review only

STROBE 2007 (v4) Statement—Checklist of items that should be included in reports of *cross-sectional studies*

| Section/Topic                | Item # | Recommendation                                                                                                                                                                       | Reported on page # |
|------------------------------|--------|--------------------------------------------------------------------------------------------------------------------------------------------------------------------------------------|--------------------|
| Title and abstract           | 1      | (a) Indicate the study's design with a commonly used term in the title or the abstract                                                                                               | 1                  |
|                              |        | (b) Provide in the abstract an informative and balanced summary of what was done and what was found                                                                                  | 3                  |
| <b>Introduction</b>          |        |                                                                                                                                                                                      |                    |
| Background/rationale         | 2      | Explain the scientific background and rationale for the investigation being reported                                                                                                 | 6                  |
| Objectives                   | 3      | State specific objectives, including any prespecified hypotheses                                                                                                                     | 7                  |
| <b>Methods</b>               |        |                                                                                                                                                                                      |                    |
| Study design                 | 4      | Present key elements of study design early in the paper                                                                                                                              | 8                  |
| Setting                      | 5      | Describe the setting, locations, and relevant dates, including periods of recruitment, exposure, follow-up, and data collection                                                      | 8                  |
| Participants                 | 6      | (a) Give the eligibility criteria, and the sources and methods of selection of participants                                                                                          | 8                  |
| Variables                    | 7      | Clearly define all outcomes, exposures, predictors, potential confounders, and effect modifiers. Give diagnostic criteria, if applicable                                             | 8,9,35,36          |
| Data sources/<br>measurement | 8*     | For each variable of interest, give sources of data and details of methods of assessment (measurement). Describe comparability of assessment methods if there is more than one group | 9                  |
| Bias                         | 9      | Describe any efforts to address potential sources of bias                                                                                                                            | 9                  |
| Study size                   | 10     | Explain how the study size was arrived at                                                                                                                                            | NA                 |
| Quantitative variables       | 11     | Explain how quantitative variables were handled in the analyses. If applicable, describe which groupings were chosen and why                                                         | 9                  |
| Statistical methods          | 12     | (a) Describe all statistical methods, including those used to control for confounding                                                                                                | 9                  |
|                              |        | (b) Describe any methods used to examine subgroups and interactions                                                                                                                  | 8,9,32,33          |
|                              |        | (c) Explain how missing data were addressed                                                                                                                                          | 8,9,35,36          |
|                              |        | (d) If applicable, describe analytical methods taking account of sampling strategy                                                                                                   | NA                 |
|                              |        | (e) Describe any sensitivity analyses                                                                                                                                                | NA                 |
| <b>Results</b>               |        |                                                                                                                                                                                      |                    |



|                          |     |                                                                                                                                                                                                              |             |
|--------------------------|-----|--------------------------------------------------------------------------------------------------------------------------------------------------------------------------------------------------------------|-------------|
| Participants             | 13* | (a) Report numbers of individuals at each stage of study—eg numbers potentially eligible, examined for eligibility, confirmed eligible, included in the study, completing follow-up, and analysed            | 8,11,36     |
|                          |     | (b) Give reasons for non-participation at each stage                                                                                                                                                         | NA          |
|                          |     | (c) Consider use of a flow diagram                                                                                                                                                                           | NA          |
| Descriptive data         | 14* | (a) Give characteristics of study participants (eg demographic, clinical, social) and information on exposures and potential confounders                                                                     | 11,32,33    |
|                          |     | (b) Indicate number of participants with missing data for each variable of interest                                                                                                                          | NA          |
| Outcome data             | 15* | Report numbers of outcome events or summary measures                                                                                                                                                         | 11-15,35,36 |
| Main results             | 16  | (a) Give unadjusted estimates and, if applicable, confounder-adjusted estimates and their precision (eg, 95% confidence interval). Make clear which confounders were adjusted for and why they were included | 11-15,35,36 |
|                          |     | (b) Report category boundaries when continuous variables were categorized                                                                                                                                    | 35,36       |
|                          |     | (c) If relevant, consider translating estimates of relative risk into absolute risk for a meaningful time period                                                                                             | NA          |
| Other analyses           | 17  | Report other analyses done—eg analyses of subgroups and interactions, and sensitivity analyses                                                                                                               | 11-15,35,36 |
| <b>Discussion</b>        |     |                                                                                                                                                                                                              |             |
| Key results              | 18  | Summarise key results with reference to study objectives                                                                                                                                                     | 16,18       |
| Limitations              | 19  | Discuss limitations of the study, taking into account sources of potential bias or imprecision. Discuss both direction and magnitude of any potential bias                                                   | 16          |
| Interpretation           | 20  | Give a cautious overall interpretation of results considering objectives, limitations, multiplicity of analyses, results from similar studies, and other relevant evidence                                   | 16-18       |
| Generalisability         | 21  | Discuss the generalisability (external validity) of the study results                                                                                                                                        | 16-18       |
| <b>Other information</b> |     |                                                                                                                                                                                                              |             |
| Funding                  | 22  | Give the source of funding and the role of the funders for the present study and, if applicable, for the original study on which the present article is based                                                | 19          |

\*Give information separately for cases and controls in case-control studies and, if applicable, for exposed and unexposed groups in cohort and cross-sectional studies.

**Note:** An Explanation and Elaboration article discusses each checklist item and gives methodological background and published examples of transparent reporting. The STROBE checklist is best used in conjunction with this article (freely available on the Web sites of PLoS Medicine at <http://www.plosmedicine.org/>, Annals of Internal Medicine at <http://www.annals.org/>, and Epidemiology at <http://www.epidem.com/>). Information on the STROBE Initiative is available at [www.strobe-statement.org](http://www.strobe-statement.org).



**Strategies to Increase Influenza Vaccination Rates:  
Outcomes of a Nationwide Cross-sectional Survey of UK  
General Practice**

|                                 |                                                                                                                                                                                                                                                                                                                                                                  |
|---------------------------------|------------------------------------------------------------------------------------------------------------------------------------------------------------------------------------------------------------------------------------------------------------------------------------------------------------------------------------------------------------------|
| Journal:                        | <i>BMJ Open</i>                                                                                                                                                                                                                                                                                                                                                  |
| Manuscript ID:                  | bmjopen-2011-000851.R2                                                                                                                                                                                                                                                                                                                                           |
| Article Type:                   | Research                                                                                                                                                                                                                                                                                                                                                         |
| Date Submitted by the Author:   | 02-Apr-2012                                                                                                                                                                                                                                                                                                                                                      |
| Complete List of Authors:       | Dexter, Laura; University of Sheffield, Department of Infection and Immunity<br>Teare, M; University of Sheffield, School of Health and Related Research<br>Dexter, Matthew; Retford Health,<br>Siriwardena, A. Niroshan; University of Lincoln, School of Health and Social Care<br>Read, Robert; University of Sheffield, Department of Infection and Immunity |
| <b>Primary Subject Heading</b>: | General practice / Family practice                                                                                                                                                                                                                                                                                                                               |
| Secondary Subject Heading:      | Evidence based practice, Infectious diseases, Public health, Pharmacology and therapeutics, Respiratory medicine                                                                                                                                                                                                                                                 |
| Keywords:                       | PRIMARY CARE, VIROLOGY, VACCINATION                                                                                                                                                                                                                                                                                                                              |
|                                 |                                                                                                                                                                                                                                                                                                                                                                  |

SCHOLARONE™  
Manuscripts

Only

**TITLE:**

**Strategies to Increase Influenza Vaccination Rates: Outcomes of a Nationwide Cross-sectional Survey of UK General Practice**

**AUTHORS:**

Laura J Dexter, M Dawn Teare, Matthew Dexter, A Niroshan Siriwardena, Robert C Read

**AUTHORS' ADDRESSES AND POSITIONS:**

Academic Unit of Immunology and Infectious Diseases, Department of Infection and Immunity, The University of Sheffield Medical School, Beech Hill Road, Sheffield, S10 2RX, United Kingdom

Laura J Dexter

NIHR Clinical Lecturer in Virology

Health Services Research, School of Health and Related Research, University of Sheffield, Regent Court, 30 Regent Street, Sheffield, S1 4DA, United Kingdom

M Dawn Teare

Lecturer in Medical Epidemiology

Retford Health, Retford Primary Care Centre, North Road, Retford, DN22 7XF, United Kingdom

Matthew Dexter

General Practitioner

Lincoln School of Health and Social Care, University of Lincoln, Brayford Pool, Lincoln, LN6 7TS, United Kingdom

1  
2  
3 A Niroshan Siriwardena

4  
5 Professor of Primary and Pre-hospital Health Care

6  
7  
8  
9 Department of Infection and Immunity, The University of Sheffield Medical School, Beech Hill Road

10  
11 Sheffield, S10 2RX, United Kingdom

12  
13 Robert C Read [guarantor]

14  
15 Professor of Infectious Diseases

16  
17  
18  
19  
20 Correspondence to: L J Dexter [l.dexter@sheffield.ac.uk](mailto:l.dexter@sheffield.ac.uk)

21  
22  
23  
24  
25 The Corresponding Author has the right to grant on behalf of all authors and does grant on behalf of  
26  
27 all authors, an exclusive licence (or non exclusive for government employees) on a worldwide basis to  
28  
29 the BMJ Publishing Group Ltd and its licensees, to permit this article (if accepted) to be published in  
30  
31 BMJ editions and any other BMJPG products and to exploit all subsidiary rights, as set out in our  
32  
33 licence (<http://resources.bmj.com/bmj/authors/checklists-forms/licence-for-publication>).  
34  
35  
36  
37  
38  
39  
40  
41  
42  
43  
44  
45  
46  
47  
48  
49  
50  
51  
52  
53  
54  
55  
56  
57  
58  
59  
60

## ABSTRACT

### *Objective*

To identify practice strategies associated with higher flu vaccination rates in primary care.

### *Design*

Logistic regression analysis of data from a cross-sectional online questionnaire

### *Setting*

795 general practices across England

### *Participants*

569 practice managers, 335 nursing staff and 107 GPs

### *Primary outcome measures*

Flu vaccination rates achieved by each practice in different groups of at-risk patients.

### *Results*

Seven independent factors associated with higher vaccine uptake were identified. Having a lead staff member for planning the flu campaign and producing a written report of practice performance predicted an 8% higher vaccination rate for at-risk patients aged <65 years (OR 1.37; 95% CI 1.10 to 1.71). These strategies, plus sending a personal invitation to all eligible patients and only stopping vaccination when QOF targets are reached, predicted a 7% higher vaccination rate (OR 1.45; 95% CI 1.10 to 1.92) in patients ≥65 years. Using a lead member of staff for identifying eligible patients, with either a modified manufacturer's or in-house search program for interrogating the practice IT system, independently predicted a 4% higher vaccination rate in patients aged ≥65 years (OR 1.22; 95% CI

1  
2  
3 1.06 to 1.41 / OR 1.20; 95% CI 1.03 to 1.40). The provision of flu vaccine by midwives was associated  
4  
5 with a 4% higher vaccination rate in pregnant women (OR 1.19; 1.02 to 1.40).  
6  
7

8  
9  
10 *Conclusion*

11  
12 Clear leadership, effective communication about performance, and methods used to identify and  
13  
14 contact eligible patients were independently associated with significantly higher rates of flu  
15  
16 vaccination. Financial targets appear to incentivise practices to work harder to maximise seasonal  
17  
18 influenza vaccine uptake. The strategies identified here could help primary care providers to  
19  
20 substantially increase their seasonal flu vaccination rates towards or even above the CMO's targets.  
21  
22  
23  
24  
25  
26  
27  
28  
29  
30  
31  
32  
33  
34  
35  
36  
37  
38  
39  
40  
41  
42  
43  
44  
45  
46  
47  
48  
49  
50  
51  
52  
53  
54  
55  
56  
57  
58  
59  
60

## ARTICLE SUMMARY

### *Article focus*

- Uptake of seasonal influenza vaccination in the UK's at-risk population is below the national and international target of 75%.
- Evidence-based guidance, to advise practices how to optimise all aspects of their flu vaccination campaigns and maximise their likelihood of protecting at-risk patients against flu and its serious sequelae, is greatly needed.
- This study sought to identify which strategies and procedures were associated with higher rates of flu vaccine uptake.

### *Key messages*

- This study has identified seven key strategies that were significantly associated with the success of practices' seasonal flu vaccination campaigns.
- If widely implemented by GP practices, average vaccination rates would be predicted to rise by 7-8% (thereby exceeding the WHO target in patients >65 years).

### *Strengths and limitations of this study*

- The study sample was large and representative, despite a participation rate of only 27.5%.
- Outcome measures (vaccination rates) were objective and corrected for practice size.
- Strategies used to provide and encourage vaccination were self-reported.

## INTRODUCTION

### *Influenza*

Influenza (flu) is a common, potentially severe, but preventable infection that places a high burden on patients and healthcare providers <sup>1 2</sup>. A safe and effective inactivated (killed) vaccine is produced ahead of each flu season, based on strain recommendations provided by the World Health Organisation (WHO), and is offered to at-risk groups in the UK free of charge <sup>3-6</sup>. These groups have been chosen based on evidence showing increased risk of severe flu infection or sequelae: epidemiological data from 2010-2011 indicated that patients in a risk group due to chronic disease had a 10-fold greater risk of mortality due to influenza, compared to those who were not in an at-risk group <sup>1</sup>. During the 2010-2011 flu season 602 deaths in the UK were due directly to influenza <sup>1</sup>. Of those who died, approximately two-thirds were in a clinical risk group that is targeted for vaccination, while only 25% had received vaccination for that season.

WHO guidance indicates that developed countries should achieve 75% influenza vaccine coverage in the elderly, while the European Union Council (EC) advises that members should aim to vaccinate 75% of all those at high risk from influenza infection <sup>7 8</sup>. England's Chief Medical Officer (CMO) has instructed that, in 2011-12, each practice should aim to reach or exceed 75% uptake for people aged 65 years or over, and 60% uptake for at-risk people under age 65 (increasing to 75% by 2013/14) <sup>6</sup>. Published data suggests that approximately 27% of England's population was eligible for free flu vaccination in 2010 <sup>9 10</sup>. Providing seasonal influenza vaccination is a large and complex task which is performed well in the UK, in comparison to many other European countries <sup>11</sup>. Over 10 million patients were vaccinated in England in the 2010-11 season: each general practice vaccinating an average of approximately 1000 patients, mostly within a period of 4-6 weeks. The proportion of people aged over 65 years in England who received the 2010/11 influenza vaccine was, at 72.8%, just below the target of 75% <sup>9</sup>. However, both past and current rates of vaccination in the under-65 at-risk groups fall far short of the EC or CMO targets: during 2010/11 the rate achieved was 50.4%; in



1  
2 pregnant women who were not otherwise at risk it was only 36.6%, despite increasing evidence  
3  
4 showing the beneficial effects of protection against flu for both mothers and babies<sup>9 12-14</sup>.  
5  
6

7  
8  
9 A few previous studies have investigated the utility of specific interventions (such as telephone calls  
10  
11 or letters) to generate an increase in uptake, but an optimal overall strategy for primary care  
12  
13 providers remains undefined<sup>15 16</sup>. In this study, we aimed to investigate the entire process of flu  
14  
15 vaccine provision in a wide range of UK general practices, in order to determine the correlates of  
16  
17 higher vaccine uptake and to inform comprehensive, evidence-based recommendations for best  
18  
19 practice.  
20  
21

22  
23  
24  
25  
26  
27  
28  
29  
30  
31  
32  
33  
34  
35  
36  
37  
38  
39  
40  
41  
42  
43  
44  
45  
46  
47  
48  
49  
50  
51  
52  
53  
54  
55  
56  
57  
58  
59  
60

Peer review only

## METHODS

### *Survey development*

Individual or small-group interviews with GPs, nurses and practice managers from six practices already achieving high rates of flu vaccination in urban (city), semi-rural (market town) and rural (village) areas were carried out, during which staff were asked to identify the factors considered by practices in designing and carrying out their flu vaccination campaigns. The information gained was used to construct three online questionnaires (one each for the participating groups of GPs, practice managers and practice nurses), using the Survey Monkey web-based software<sup>17</sup>. The format of the questions and the layout of the questionnaires were designed to optimise the statistical utility of the data to be collected. The questionnaires were piloted in the same six practices to further ascertain relevance and usability before final distribution.

### *Questionnaire distribution and survey participants*

We aimed to distribute the questionnaires to all registered GPs, practice nursing staff and practice managers within four Strategic Health Authorities (SHAs) (East Midlands, London, West Midlands and Yorkshire and Humber), which together provide care for approximately 40% of the UK population. Details about the survey were sent via the Public Health teams in the participating SHAs, who were requested to cascade the information to members of individual primary care teams (GPs, nurses and practice managers) in their area via normal electronic information circulation mechanisms. The same method was used for all other communications with participants during the study. A preliminary e-mail, containing a letter informing primary care teams about the forthcoming study, was distributed two weeks before the first survey invitation. Two emails, inviting participation in the survey and containing web links to the online questionnaires, were then distributed in two consecutive weeks during August 2011.

### *Vaccine uptake data and other comparators*

The Immform web service, which is a UK Department of Health website for collecting vaccination data from general practices, was used to obtain practice-level flu vaccination uptake data for the period 1<sup>st</sup> September 2010 – 28<sup>th</sup> February 2011<sup>18</sup>. Actual numbers vaccinated and actual numbers eligible were recorded for 65+ year olds and at-risk <65 year olds (including pregnant women). These are standard groups used for targeting and measuring influenza vaccine uptake by the WHO). Total practice population size was also recorded. Other practice-level data, including summary Quality and Outcomes Framework (QOF) scores (most recent data available, for April 2009-March 2010) and a variety of demographic measures, were obtained in order to identify and/or adjust for other factors which may differentially affect vaccine uptake rates (such as overall practice quality performance, practice size, population ethnicity or population deprivation)<sup>19 20</sup>. QOF is a programme of annual financial rewards for GP surgeries, which forms part of the GP contract in England and Wales<sup>21</sup>. The above information was linked to the questionnaire responses by NHS practice code (a unique six-figure identifier); codes were then removed from the dataset prior to analysis.

### *Statistical analyses*

In addition to a full descriptive analysis of the variables recorded in the questionnaires, logistic regression analyses were performed using STATA to compare the proportions of patients vaccinated across different categorical responses in the survey questionnaire. The logistic regression was based upon absolute numbers of patients vaccinated out of the total at-risk, to account for differences in at-risk practice population size. Potentially confounding variables, such as total practice size, Index of Multiple deprivation and proportion white ethnicity, were analysed for correlation with vaccination uptake and adjusted for in the univariable analyses where appropriate. As there was not always complete agreement between responses from different participants in the same practice, robust standard errors were computed using a cluster correction model, thereby generating data corrected to the practice level. Multivariate regression analysis was then performed on any 2 or more results

1  
2  
3 from the same subset(s) of participants (i.e. practice managers, nurses and/or GPs) which showed  
4  
5 significance at the 95% level on univariable analysis.  
6  
7  
8  
9  
10  
11  
12  
13  
14  
15  
16  
17  
18  
19  
20  
21  
22  
23  
24  
25  
26  
27  
28  
29  
30  
31  
32  
33  
34  
35  
36  
37  
38  
39  
40  
41  
42  
43  
44  
45  
46  
47  
48  
49  
50  
51  
52  
53  
54  
55  
56  
57  
58  
59  
60

For peer review only

## RESULTS

Fifty PCTs distributed the survey invitation to a total of 2896 practices. Responses were submitted by 569 practice managers, 335 nursing staff and 107 GPs, representing 795 practices (27.5% of those invited to contribute). These practices serve a total of approximately 5.8 million patients, among whom over 1.5 million are eligible for influenza vaccination. The distributions of flu vaccination rates in the surveyed practices were well matched to national patterns (Figure 1). For the majority of eligible patients (i.e. those aged 65 years and above), our findings indicated that the variation between practices' flu vaccination rates was not influenced by differences in the ethnicity or affluence of their patient populations, whereas Quality and Outcomes Framework summary scores showed highly and significant positive correlations with vaccine uptake achieved in both age groups (supplementary table 1). The univariable logistic regression results referred to throughout this section are shown in supplementary table 2.

### *Staffing*

Having a lead member of staff for arranging the practice flu vaccination campaign was associated with increased flu vaccine uptake rates in both 65+ and <65 age groups ( $p = 0.001$  and  $0.004$  respectively). Nominating a staff member with responsibility for identifying eligible patients was associated with increased uptake of vaccine in older age groups ( $p = 0.038$ ), but this trend, although present, did not reach significance in under 65s ( $p = 0.218$ ).

### *Ordering vaccine*

A plot of the number of vaccine doses ordered for 2011-12 versus vaccines used in 2010-11 shows a tight correlation (figure 2a). On average, practices were found to have ordered vaccines based on the number of doses given in the previous season, with an average uplift of 8.8% (95% confidence interval 4.3 – 13.3%;  $n = 568$ ). As vaccines are ordered as a total, these data could not be differentiated into

1  
2  
3 doses intended for vaccination of patients aged over or under 65 years old. However, the data  
4  
5 showed that only 78.3% of responding practices would have been able to vaccinate at least 75% of  
6  
7 their at-risk patients (in accordance with the CMO recommendations) (figure 2b).  
8  
9

### 10 11 12 *Contacting patients*

13  
14 Using personal invitations, either alone or in combination with general publicity, was significantly  
15  
16 associated with higher rates of vaccination. The use of personal invitations for all patients (not just  
17  
18 those who did not respond to an initial general publicity campaign) was associated with the highest  
19  
20 vaccination rates in the larger, 65+ age group ( $p = 0.003$ ), although a similar association did not reach  
21  
22 statistical significance in the under 65s. Using both letters and telephone calls was not associated with  
23  
24 significantly different vaccination rates than using either letters or phone calls alone ( $p = 0.721$  for  
25  
26 patients aged 65+;  $p = 0.852$  for patients aged <65).  
27  
28  
29  
30  
31  
32

### 33 *Identifying eligible patients*

34  
35 Programmes for identifying eligible patients from the practices' IT system are usually issued by the  
36  
37 software providers. Modifying the IT supplier's standard search or creating a separate in-house search  
38  
39 was associated with significantly higher uptake rates for patients aged 65+ than using an unmodified  
40  
41 IT supplier's search ( $p < 0.001$  and  $0.027$ , respectively). A similar trend for under 65s did not reach  
42  
43 statistical significance, perhaps due to insufficient power. As older patients are identified simply on  
44  
45 the basis of their age at a certain date, which should not require a complicated search strategy, these  
46  
47 findings suggest that creating or modifying a system search reflects that the staff in these practices  
48  
49 are more motivated and/or experienced to use their IT system to try to achieve their flu vaccination  
50  
51 targets.  
52  
53  
54  
55  
56  
57  
58  
59  
60

### *Offering clinics and appointments*

More than 95% of practices held the main vaccination sessions at their usual surgery premises and 75% held the main sessions during normal surgery hours. Most practices reported using a variety of appointment types and timings to provide flu vaccination. Surprisingly, in our data, offering vaccinations at weekends, or before 8am or after 6pm, was not associated with a significant difference in the vaccination uptake rates achieved. Increasing numbers of reminders or repeat invitations were associated with significantly increased vaccine uptake in the under 65 year olds ( $p = 0.038$ ), though not in those aged 65+. Significantly higher rates of vaccination (for under 65s) occurred in practices that identified appointments for flu vaccination using a specific Read (computer identification) code ( $p = 0.038$ ).

### *Vaccinating pregnant women*

The proportion of practices that reported that their community midwives recommended flu vaccination to pregnant women was disappointingly low (57.5%). Furthermore, there was a clear discrepancy between this figure and the proportion that reported that their community midwives actually administered vaccine (17.8%; see figure 3a). Our analysis demonstrated that practices where community midwives were active in administering flu vaccinations to pregnant patients achieved significantly higher rates of uptake in this particular at-risk group ( $p = 0.023$ ).

### *Ending and reviewing the campaign*

A total of 578 practices provided information on what influenced their decision to stop offering flu vaccination. Of major concern was the evidence that almost 50% of practices stopped offering flu vaccines partly, or solely, because they had exhausted their stock. Almost one third (28.9%) cited a financial factor in making their decision and the data showed that ending flu vaccination only once QOF targets had been reached was associated with increased uptake rates for those aged 65+ ( $p =$

1  
2  
3 0.048); in those aged under 65 this was only weakly significant ( $p = 0.100$ ), perhaps influenced by the  
4  
5 smaller numbers of patients in this group. These results suggest that practices that focused on  
6  
7 financial targets were motivated and/or organised to continue their efforts to vaccinate patients  
8  
9 beyond the point at which other practices may stop. In support of this hypothesis, we found that  
10  
11 patients whose vaccination would contribute to a QOF-related payment received an average of 42%  
12  
13 (95% CI 33 to 51%) more reminders more than those who did not have a QOF-registered indication  
14  
15 for vaccination ( $p < 0.001$ ).  
16

17  
18 Practices which produced a written report reviewing their flu vaccination rates achieved very  
19  
20 significantly higher vaccination rates in both younger and older age groups, compared to those  
21  
22 practices which did not produce a written report ( $p = 0.006$  for patients aged 65+;  $p = 0.002$  for  
23  
24 patients aged <65 years). Similarly, reviewing the practice's flu vaccination strategy in a written  
25  
26 format was also significantly associated with achieving higher rates of vaccination ( $p = 0.067$  for  
27  
28 patients aged 65+;  $p = 0.028$  for patients aged <65 years). This finding suggests that that practices  
29  
30 which produced written reports may have been able to organise more rigorous campaigns, and/or  
31  
32 have had more well-informed and motivated staff, resulting in more effective performance.  
33  
34  
35  
36  
37  
38

#### 39 *Personal motivations and attitudes of staff*

40  
41  
42 Figure 3b shows a summary of GPs', nurses' and practice managers' views of the flu vaccination  
43  
44 campaign. There was a significant association between encouraging vaccination among colleagues  
45  
46 and other staff and achieving higher rates of vaccine uptake in patients aged 65 or above ( $p = 0.004$ ),  
47  
48 but not in those aged under 65 years ( $p = 0.208$ ). There was a trend for a similar association between  
49  
50 positive attitudes of staff towards being vaccinated themselves and higher rates of patient  
51  
52 vaccination in a practice, but this did not reach statistical significance in either the older or younger  
53  
54 age group ( $p = 0.440$  and  $0.185$  respectively).  
55  
56  
57  
58  
59  
60



1  
2  
3 *Predicted impact of strategies to increase rates of influenza vaccination*  
4

5  
6 Seven factors were found to have significant, independent positive associations with flu vaccine  
7  
8 uptake levels following multivariable regression analysis (Tables 1a and 1b). For patients aged <65  
9  
10 years, having a lead member of staff for planning the flu campaign and producing a written report of  
11  
12 the practice's performance were associated with a combined odds ratio of 1.37, which predicts an 8%  
13  
14 higher flu vaccination rate for practices that employ these strategies compared to those that do not  
15  
16 (54% vs. 46%).  
17

18  
19 In patients aged 65 or over, a further two factors were also found to remain independently correlated  
20  
21 with increased rates of flu vaccination. These were sending a personal invitation to all eligible patients  
22  
23 and only stopping vaccination when QOF targets are reached. The overall odds ratio associated with  
24  
25 the implementation of all four strategies in this age group was 1.45, which predicts a 7% higher  
26  
27 vaccination rate in this age group when these strategies are used (78% vs. 71%).  
28

29  
30 The strategies of using a lead member of staff for identifying eligible patients and either a modified  
31  
32 manufacturer's search program or an in-house search program for interrogating the practice IT  
33  
34 system were also independently correlated with increased rates of flu vaccination in patients aged 65  
35  
36 years or more. However, the effect seen was weaker as this data is derived from a subset of  
37  
38 responses from practice managers only, suggesting a rise to 78% from a baseline of 74%.  
39

40  
41 The active involvement of midwives in providing flu vaccination was significantly associated with  
42  
43 higher levels of vaccine uptake in pregnant women but, as the only significant variable within this  
44  
45 group, the finding could not be included in a multivariable analysis. However, applying the odds ratio  
46  
47 of 1.20 predicted by the univariable analysis, our data indicates that the provision of vaccination by  
48  
49 midwives rather than GPs is associated with an increase in uptake rate to 45% in pregnant women  
50  
51 (from an observed average baseline vaccination rate of 41% in our cohort).  
52  
53  
54  
55  
56  
57  
58  
59  
60

## DISCUSSION

This study has identified seven factors which GPs might use to improve and maximise uptake of seasonal flu vaccine in at-risk patients. Many of these strategies are common sense and align with the empirical guidance given by the English and Scottish CMOs<sup>22 23</sup>, but our study provides the first statistical evidence to support the validity of such approaches. The study sample was large and appeared to be representative of the overall cohort, despite a participation rate of only 27.5%. Although we found no evidence for selection bias of participating practice staff, when the vaccination rates of participating practices were compared with national data, it remains possible that the responses of staff who completed the questionnaire did not reliably represent the views of all practice staff within those participating practices. However, most of our questions sought factual data rather than opinions and so this bias, if present, is likely to be limited.

This study focused on identifying strategies and approaches that GPs might use or influence to improve vaccine uptake. However, numerous patient-related factors also affect flu vaccine uptake. Highly mobile or ethnically diverse populations may prove very difficult to contact and target for flu vaccination. It is also likely that a minority of patients will always refuse or miss vaccination, no matter how much GPs strive to provide it. Public perception of influenza as a significant threat to health and of vaccination as an effective preventative strategy is associated with higher uptake<sup>24</sup>. People who receive information about these factors from official health sources (particularly GPs or nurses in the primary care setting) and who think that others want them to be vaccinated are more likely to get vaccinated<sup>11 24 25</sup>. In line with this, flu vaccination uptake is greater among older people and others who make routine use of hospital and community care services<sup>26</sup>. Unsurprisingly, fear of side-effects of vaccination is a strong negative influence, while lack of general motivation and ignorance about the recommendations are other commonly reported barriers to both seasonal and pandemic vaccination<sup>27 28</sup>. However, when intensive recall stimuli and information are provided to at-risk patients, as few as 3.5% will refuse vaccination, suggesting that patient attitudes are malleable

1  
2  
3 and should not present a barrier to achieving the CMO's aims <sup>29</sup>. Our results strongly support the  
4  
5 provision of personal invitations for all patients (in alternative languages and/or formats, if required),  
6  
7 as advised by the CMO <sup>22</sup>. However, we found little evidence of benefit from offering very early  
8  
9 (before 8am), late (after 6pm) or weekend appointments. This contradicts some current guidance <sup>22</sup>  
10  
11 and is likely to be of financial relevance for practices. Our findings with respect to the flu vaccination  
12  
13 of pregnant women are also important. Although administering flu vaccine is not part of the current  
14  
15 role of many midwives, it is logical that the ability both to discuss and to provide vaccination to  
16  
17 pregnant women would increase uptake in this risk group by removing the need for referral and  
18  
19 attendance at a separate clinic: our analyses now support this logic. However, if midwives were to  
20  
21 provide influenza vaccination outside of the practice setting, it would be essential for reliable records  
22  
23 of this to be transferred to the GP  
24  
25

26  
27 The need for good communication with patients, to encourage the uptake of flu vaccination, is  
28  
29 axiomatic. However, several statistically significant outcomes of our analyses have not previously  
30  
31 been described and are directly or indirectly associated with the quality or extent of communication  
32  
33 *within* practices. The production of a written review of practice performance might be associated with  
34  
35 higher flu vaccination rates for a number of reasons. Production of such a report indicates that at  
36  
37 least one member of staff must be able to access and manipulate the relevant data using their  
38  
39 practice's computer systems, and is motivated to do so. Subsequent dissemination of the report  
40  
41 allows staff to become aware of their practice's performance and identify areas for improvement.  
42  
43 Only 20% of practices in our study produced a written report of vaccine uptake rates and this strategy  
44  
45 is not currently recommended in the CMO guidance for England. Our results also indicate that each  
46  
47 practice should nominate lead members of staff not only for organising the practice's influenza  
48  
49 vaccination campaign (as advised by the English and Scottish CMOs <sup>22 23</sup>, but also for identifying at-risk  
50  
51 patients from the practice database. This is supported by a recently published study from the US,  
52  
53 which suggested that effective use of electronic databases by a skilled data manager could increase  
54  
55 the rate of flu vaccination by over 10% <sup>30</sup>. The ability to perform a modified or in-house search of the  
56  
57  
58  
59  
60

1  
2  
3  
4  
5  
6  
7  
8  
9  
10  
11  
12  
13  
14  
15  
16  
17  
18  
19  
20  
21  
22  
23  
24  
25  
26  
27  
28  
29  
30  
31  
32  
33  
34  
35  
36  
37  
38  
39  
40  
41  
42  
43  
44  
45  
46  
47  
48  
49  
50  
51  
52  
53  
54  
55  
56  
57  
58  
59  
60

practice's patient database is unlikely to improve the simple process of identification of those aged over 65 years. However, a member of staff who is thoroughly familiar with the IT system may be more able to contribute to improved rates of vaccination by, for example: monitoring levels of appointment bookings and vaccine uptake in real-time throughout the campaign; generating automatic invitation and reminder letters, text messages or emails; creating alert flags on the patient record to promote opportunist vaccination. Our study's findings also suggest that the effectiveness of a practice's flu vaccination campaign is increased when staff promote vaccination among themselves, an effect which may arise from increased motivation for the campaign as a whole or through communication of their positive attitude to at-risk patients. This supports the findings of previous studies and should thus contribute to an increased impetus to encourage vaccination of staff<sup>31 32</sup>.

The relationship between staff motivation and practice performance is neither simple nor exclusive. Individuals may have different motivations and their interaction within a larger team may produce variable outcomes. We do not argue that introducing written reports and/or tailoring the practice search strategies would necessarily increase motivation. However, in practices where these actions are not already undertaken, their introduction would ensure that staff become more aware of the practice's performance and the underlying mechanisms that influence it. Having found a highly significant correlation of these strategies with increased vaccine uptake, we propose that increased awareness and knowledge may help to increase staff motivation. However, our study was not designed to measure motivation per se or its effects in isolation and this would be an interesting (though challenging) area for further study.

There is currently a significant financial risk for practices attempting to improve their vaccination rates. As practices are only reimbursed on the basis of the number of vaccines administered, they face a financial penalty if they buy more doses than are used and sale-or-return schemes are usually limited to a few percent of the vaccine doses in the overall order. Perhaps as a result, we have found that almost 50% of practices currently halt their vaccination campaigns due to exhaustion of vaccine stocks. A central procurement strategy for flu vaccines, which has recently undergone consultation by

1  
2  
3 the Department of Health, should remove this financial stricture and allow practices to aim for much  
4  
5 higher vaccination rates without risking financial penalty<sup>33</sup>. However, this will also result in the loss of  
6  
7 a significant proportion of practices' funding for flu vaccination (i.e. that which is currently derived  
8  
9 from any discrepancy between tariff price and purchased price for the vaccine itself). Considerable  
10  
11 effort and resources are required to deliver a successful flu vaccination campaign, and our findings  
12  
13 indicate that practices' efforts can be influenced by financial motivations. The pursuit of QOF targets  
14  
15 for flu vaccination requires practice staff to be able to perform complex interrogations of their patient  
16  
17 database and to be aware of rates of vaccine uptake while the flu vaccination campaign is  
18  
19 progressing. Our data suggests that pursuing the QOF targets may motivate practices to maintain  
20  
21 vaccine stocks and encourage extra patients to receive vaccine. We would not advise that practices  
22  
23 should automatically stop vaccinating patients once their QOF targets have been attained. However,  
24  
25 our findings suggest that a scale of financially-supported targets applicable across all patient groups,  
26  
27 or the inclusion of flu vaccination of all at-risk patients in the QOF scheme, might be a powerful tool  
28  
29 to increase flu vaccine uptake.  
30  
31

32  
33  
34 Current vaccines achieve around 50-80% protection against influenza and associated sequelae in at-  
35  
36 risk groups<sup>3 34-36</sup>. However, these efficacy rates do not translate into public health protection if the  
37  
38 vaccine is not delivered effectively to the communities that need it. With flu vaccination rates varying  
39  
40 from 15 to 100% (Figure 1) between the worst and best practices in our nationwide cohort, there is  
41  
42 the potential for enormous gains to be made. This study has identified seven simple steps that can  
43  
44 improve our performance and increase the protection of at-risk patients.  
45  
46  
47  
48  
49  
50  
51  
52  
53  
54  
55  
56  
57  
58  
59  
60

## ACKNOWLEDGEMENTS

This study was an independent report commissioned and funded by the Policy Research Programme in the Department of Health, UK (reference number 039/0035). The views expressed are not necessarily those of the Department. The study was sponsored and granted ethical approval by the University of Sheffield. We are grateful to the survey participants for taking part; to Dr Mark Ashworth, GP and Clinical Senior Lecturer at King's College London for providing the demographic and deprivation data; to Dr Helen Carter, Consultant in Public Health at NHS West Midlands, Dr Andrew Clark, Deputy Director of Public Health at NHS Yorkshire and Humber, Dr Giri Rajaratnam, Deputy Regional Director of Public Health at NHS East Midlands, Dr Leslyn Rew, Project Manager at NHS West Midlands and Dr Chloe Sellwood, Pandemic Flu Lead at NHS London and their Vaccination & Immunisation teams for arranging circulation of the survey details to primary care teams; to staff at Bridgegate, Crown House, Riverside, and Tall Trees Surgeries in Retford, Charnock Health Primary Care Centre in Sheffield, and Bawtry and Blyth Health Centre in Bawtry for feedback on questionnaire and guideline design; and to Mr Gerald Ellis, Business Manager at Retford Health for co-ordinating feedback.

Data sharing: the availability of additional data is subject to consent for its dissemination from the Department of Health Central Commissioning Facility. Neither the study sponsor nor the funder played any role in study design; in the collection, analysis, and interpretation of data; in the writing of the report; or in the decision to submit the article for publication. All authors had access to the study data (including statistical reports and tables) and can take responsibility for the integrity of the data and the accuracy of the data analysis.

Contributors: LJD designed, carried out and coordinated analysis and reporting of the study, and also drafted and revised this manuscript. MDT contributed to statistical aspects of design, carried out the

1  
2 formal data analysis and contributed to the manuscript. MD and ANS contributed to primary care and  
3  
4 policy aspects of study design and interpretation and also revised the manuscript. RCR contributed to  
5  
6 study design and interpretation and revised the manuscript. He is guarantor.  
7  
8  
9

10  
11 The Corresponding Author has the right to grant on behalf of all authors and does grant on behalf of  
12  
13 all authors, an exclusive licence (or non exclusive for government employees) on a worldwide basis to  
14  
15 the BMJ Publishing Group Ltd and its licensees, to permit this article (if accepted) to be published in  
16  
17 BMJ editions and any other BMJPG products and to exploit all subsidiary rights, as set out in our  
18  
19 licence (<http://resources.bmj.com/bmj/authors/checklists-forms/licence-for-publication>)  
20  
21  
22  
23

24  
25 All authors have completed the Unified Competing Interest form at [www.icmje.org/coi\\_disclosure.pdf](http://www.icmje.org/coi_disclosure.pdf)  
26  
27 (available on request from the corresponding author) and declare that (1) LJD, MDT, MD, ANS and  
28  
29 RCR have no support from companies for the submitted work; (2) LJD, MDT, MD, ANS and RCR have  
30  
31 no relationships with companies that might have an interest in the submitted work in the previous 3  
32  
33 years; (3) their spouses, partners, or children have no financial relationships that may be relevant to  
34  
35 the submitted work; and (4) LJD, MDT, MD, ANS and RCR have no non-financial interests that may be  
36  
37 relevant to the submitted work.  
38  
39  
40  
41  
42  
43  
44  
45  
46  
47  
48  
49  
50  
51  
52  
53  
54  
55  
56  
57  
58  
59  
60

## REFERENCES

1. Surveillance of influenza and other respiratory viruses in the UK 2010/11. Health Protection Agency, 2011.
2. Fleming DM, Elliot AJ, Nguyen-Van-Tam JS, et al. A Winter's Tale: coming to terms with winter respiratory illnesses. Health Protection Agency, 2005.
3. Pebody R, Hardelid P, Fleming D, et al. Effectiveness of seasonal 2010/11 and pandemic influenza A(H1N1)2009 vaccines in preventing influenza infection in the United Kingdom: mid-season analysis 2010/11. *Euro Surveill* 2011;16(6).
4. Mangtani P, Cumberland P, Hodgson CR, et al. A cohort study of the effectiveness of influenza vaccine in older people, performed using the United Kingdom general practice research database. *J Infect Dis* 2004;190(1):1-10.
5. Influenza [chapter 19]. *Immunisation against infectious disease*. Department of Health UK, 2011.
6. Davies S. Letter from the CMO: Preparation and Assurance for 2011/12 Seasonal Influenza Immunisation Programme. Department of Health UK, 2011.
7. 56th World Health Assembly. *Prevention and control of influenza pandemics and annual epidemics*. World Health Organisation, 2003.
8. Council of the European Union. Council Recommendation of 22 December 2009 on seasonal influenza vaccination (2009/1019/EU). *Official Journal of the European Union* 2009;348(71).
9. Begum F, Pebody R. Seasonal influenza vaccine uptake amongst GP patient groups in England, Winter season 2010-11. Department of Health, 2011.
10. *Annual Mid-year Population Estimates, 2010*. Office for National Statistics, 2011.
11. Blank PR, Schwenkgenks M, Szucs TD. Vaccination coverage rates in eleven European countries during two consecutive influenza seasons. *J Infect* 2009;58(6):446-58.
12. Puleston RL, Bugg G, Hoschler K, et al. Observational study to investigate vertically acquired passive immunity in babies of mothers vaccinated against H1N1v during pregnancy. *Health Technol Assess* 2010;14(55):1-82.
13. Benowitz I, Esposito DB, Gracey KD, et al. Influenza vaccine given to pregnant women reduces hospitalization due to influenza in their infants. *Clin Infect Dis* 2010;51(12):1355-61.
14. Eick AA, Uyeki TM, Klimov A, et al. Maternal influenza vaccination and effect on influenza virus infection in young infants. *Arch Pediatr Adolesc Med* 2011;165(2):104-11.
15. Siriwardena AN, Rashid A, Johnson MR, et al. Cluster randomised controlled trial of an educational outreach visit to improve influenza and pneumococcal immunisation rates in primary care. *Br J Gen Pract* 2002;52(482):735-40.
16. Furey A, Robinson E, Young Y. Improving influenza immunisation coverage in 2000-2001: a baseline survey, review of the evidence and sharing of best practice. *Commun Dis Public Health* 2001;4(3):183-7.
17. [www.surveymonkey.com](http://www.surveymonkey.com). Accessed 22/07/2011
18. [www.immform.dh.gov.uk](http://www.immform.dh.gov.uk). Accessed 03/07/2011
19. Practice-level ethnicity and other demographic data for 2009 kindly provided by Dr Mark Ashworth, Department of Primary Care & Public Health Sciences, King's College London.
20. From: <http://www.ic.nhs.uk/statistics-and-data-collections/supporting-information/audits-and-performance/the-quality-and-outcomes-framework/qof-2009-10/data-tables>. Accessed 10/07/2011
21. Gillam S, Siriwardena A. *The Quality and Outcomes Framework: QOF transforming general practice*. Oxford: Radcliffe Publishing Ltd., 2010.
22. *Seasonal Flu Plan*. Department of Health UK, 2011.
23. Seasonal Influenza and Pneumococcal Immunisation Programmes 2010-11 (letter); Chief Medical Officer and Public Health Directorate Scotland, 2010



- 1
- 2
- 3 24. Bish A, Yardley L, Nicoll A, et al. Factors associated with uptake of vaccination against pandemic
- 4 influenza: A systematic review. *Vaccine* 2011;29(38):6472-84.
- 5 25. Maurer J, Harris KM. Contact and communication with healthcare providers regarding influenza
- 6 vaccination during the 2009-2010 H1N1 pandemic. *Prev Med* 2011;52(6):459-64.
- 7 26. Crawford VL, O'Hanlon A, McGee H. The effect of patient characteristics upon uptake of the
- 8 influenza vaccination: a study comparing community-based older adults in two healthcare
- 9 systems. *Age Ageing* 2011;40(1):35-41.
- 10 27. Myers LB, Goodwin R. Determinants of adults' intention to vaccinate against pandemic swine flu.
- 11 *BMC Public Health* 2011;11(1):15.
- 12 28. Keenan H, Campbell J, Evans PH. Influenza vaccination in patients with asthma: why is the uptake
- 13 so low? *Br J Gen Pract* 2007;57(538):359-63.
- 14 29. Humiston SG, Bennett NM, Long C, et al. Increasing inner-city adult influenza vaccination rates: a
- 15 randomized controlled trial. *Public Health Rep* 2011;126(Suppl 2):39-47.
- 16 30. Loo TS, Davis RB, Lipsitz LA, et al. Electronic medical record reminders and panel management to
- 17 improve primary care of elderly patients. *Arch Intern Med* 2011;171(17):1552-8.
- 18 31. Abramson ZH, Levi O. Is performance of influenza vaccination in the elderly related to treating
- 19 physician's self immunization and other physician characteristics? *Prev Med* 2008;47(5):550-
- 20 53.
- 21 32. Nichol KL, Zimmerman R. Generalist and subspecialist physicians' knowledge, attitudes, and
- 22 practices regarding influenza and pneumococcal vaccinations for elderly and other high-risk
- 23 patients: a nationwide survey. *Arch Intern Med* 2001;161(22):2702-8.
- 24 33. A review of the procurement of seasonal flu vaccine 2011. Immunisation Branch, Department of
- 25 Health UK, 2011.
- 26 34. Schembri S, Morant S, Winter JH, et al. Influenza but not pneumococcal vaccination protects
- 27 against all-cause mortality in patients with COPD. *Thorax* 2009;64(7):567-72.
- 28 35. Jackson LA, Gaglani MJ, Keyserling HL, et al. Safety, efficacy, and immunogenicity of an inactivated
- 29 influenza vaccine in healthy adults: a randomized, placebo-controlled trial over two influenza
- 30 seasons. *BMC Infect Dis* 2010;10:71.
- 31 36. Osterholm MT, Kelley NS, Sommer A, Belongia EA. Efficacy and effectiveness of influenza vaccines:
- 32 a systematic review and meta-analysis. *Lancet Infect Dis* 2012;12(1):36-44.
- 33
- 34
- 35
- 36
- 37
- 38
- 39
- 40
- 41
- 42
- 43
- 44
- 45
- 46
- 47
- 48
- 49
- 50
- 51
- 52
- 53
- 54
- 55
- 56
- 57
- 58
- 59
- 60

1  
2  
3 *Figure 1*

4 Box and whisker plots showing the range and distribution of influenza vaccination uptake rates for  
5 patients aged 65 years + (blue boxes and bars) and at-risk patients aged under 65 years (red boxes  
6 and bars). The distribution of uptake rates for non-participating practices (N = 2101) and participating  
7 practices (N = 795) are not significantly different.  
8  
9  
10  
11  
12  
13  
14  
15  
16  
17  
18  
19  
20  
21  
22  
23  
24  
25  
26  
27  
28  
29  
30  
31  
32  
33  
34  
35  
36  
37  
38  
39  
40  
41  
42  
43  
44  
45  
46  
47  
48  
49  
50  
51  
52  
53  
54  
55  
56  
57  
58  
59  
60

For peer review only

1  
2  
3  
4  
5  
6  
7  
8  
9  
10  
11  
12  
13  
14  
15  
16  
17  
18  
19  
20  
21  
22  
23  
24  
25  
26  
27  
28  
29  
30  
31  
32  
33  
34  
35  
36  
37  
38  
39  
40  
41  
42  
43  
44  
45  
46  
47  
48  
49  
50  
51  
52  
53  
54  
55  
56  
57  
58  
59  
60

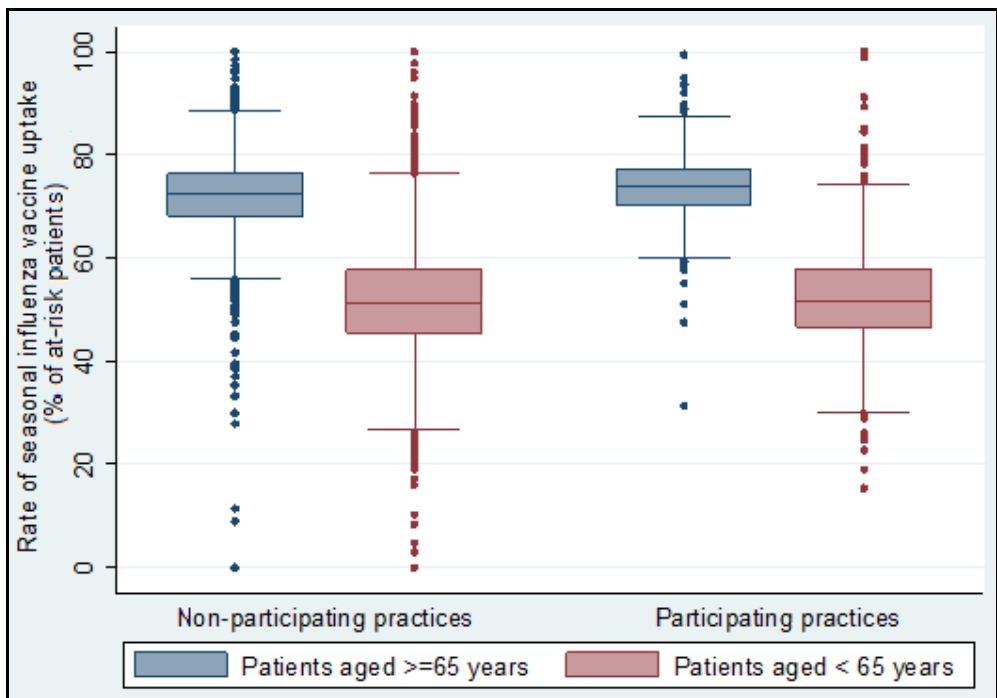

review only

1  
2  
3 *Figure 2*

4 (a) Relationship between reported total number of vaccine doses ordered for the 2011-2012 season  
5 and actual number of doses administered in 2010-2011 (n = 568), and (b) Plot showing the maximum  
6 average achievable vaccination rates for the 2011-2012 season, based on the total number of vaccine  
7 doses ordered and the total number of eligible patients. Red line indicates the CMO's target of 75%.  
8  
9  
10  
11  
12  
13  
14  
15  
16  
17  
18  
19  
20  
21  
22  
23  
24  
25  
26  
27  
28  
29  
30  
31  
32  
33  
34  
35  
36  
37  
38  
39  
40  
41  
42  
43  
44  
45  
46  
47  
48  
49  
50  
51  
52  
53  
54  
55  
56  
57  
58  
59  
60

For peer review only

1  
2  
3  
4  
5  
6  
7  
8  
9  
10  
11  
12  
13  
14  
15  
16  
17  
18  
19  
20  
21  
22  
23  
24  
25  
26  
27  
28  
29  
30  
31  
32  
33  
34  
35  
36  
37  
38  
39  
40  
41  
42  
43  
44  
45  
46  
47  
48  
49  
50  
51  
52  
53  
54  
55  
56  
57  
58  
59  
60

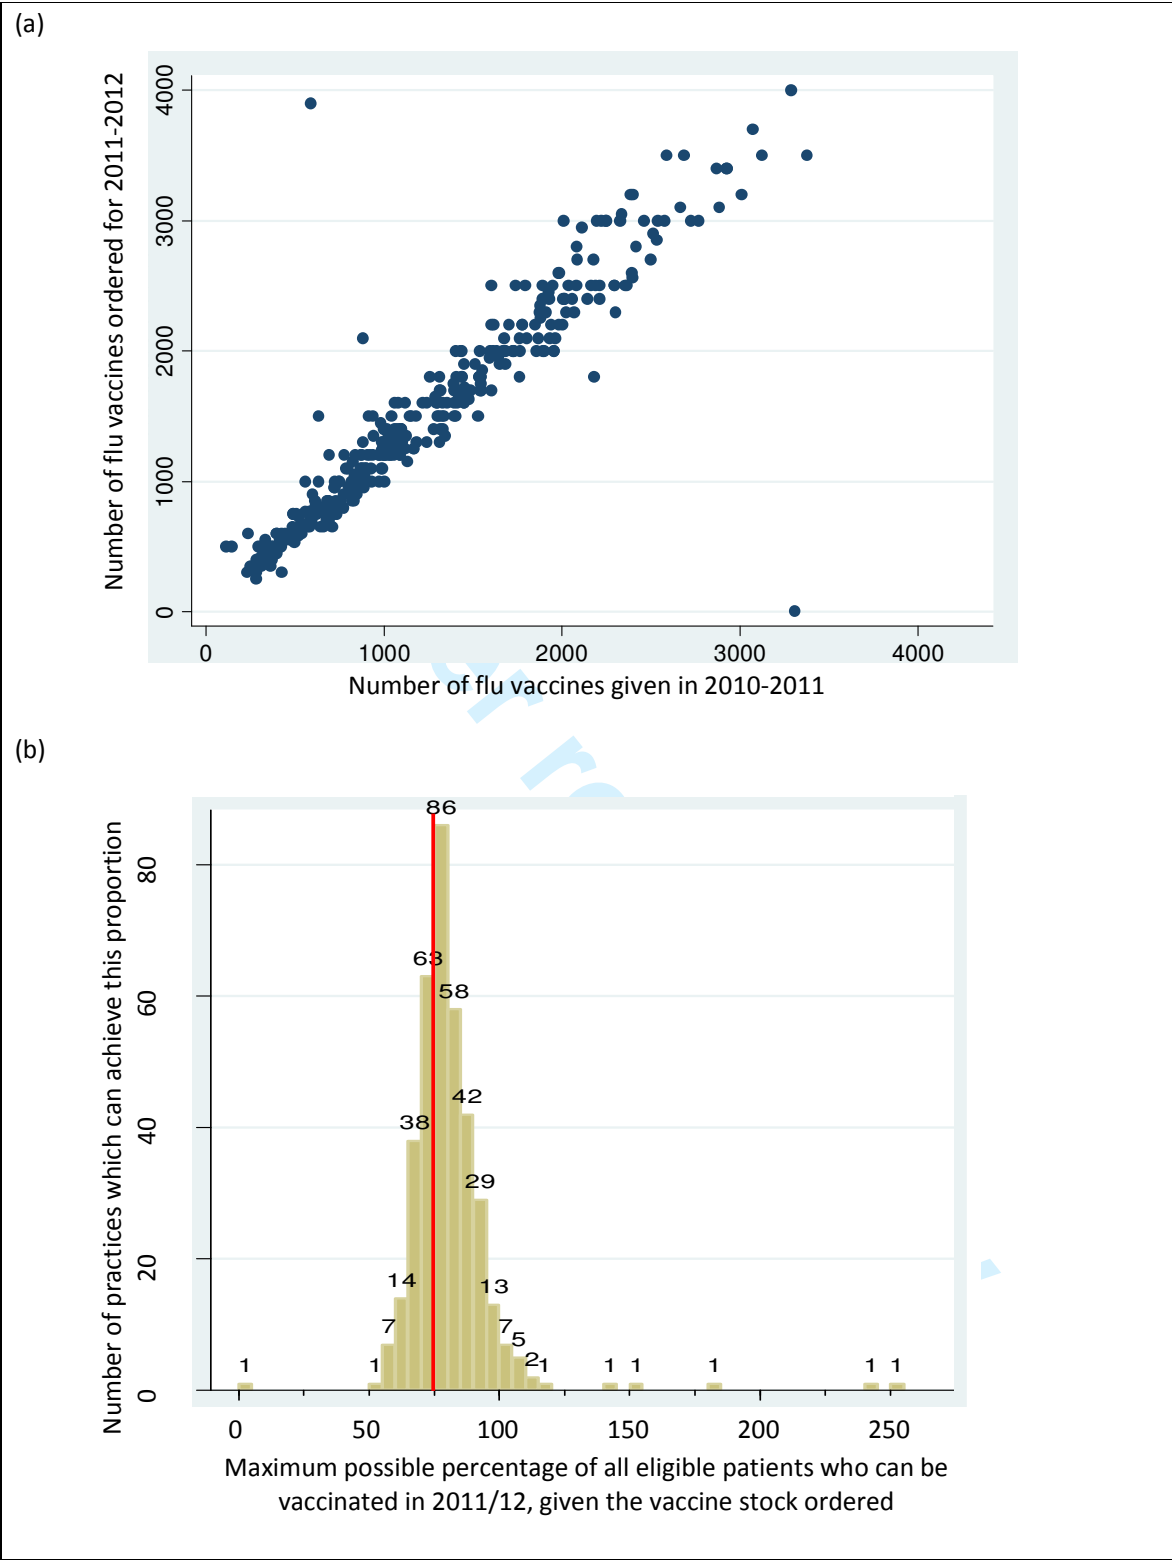

1  
2  
3  
4 *Figure 3*

5  
6  
7 Showing (a) the reported activity of community midwifery teams in recommending and providing  
8 seasonal influenza vaccination to pregnant women, and (b) the attitudes of participating healthcare  
9 workers to vaccination of colleagues and themselves  
10  
11  
12  
13  
14  
15  
16  
17  
18  
19  
20  
21  
22  
23  
24  
25  
26  
27  
28  
29  
30  
31  
32  
33  
34  
35  
36  
37  
38  
39  
40  
41  
42  
43  
44  
45  
46  
47  
48  
49  
50  
51  
52  
53  
54  
55  
56  
57  
58  
59  
60

For peer review only

1  
2  
3  
4  
5  
6  
7  
8  
9  
10  
11  
12  
13  
14  
15  
16  
17  
18  
19  
20  
21  
22  
23  
24  
25  
26  
27  
28  
29  
30  
31  
32  
33  
34  
35  
36  
37  
38  
39  
40  
41  
42  
43  
44  
45  
46  
47  
48  
49  
50  
51  
52  
53  
54  
55  
56  
57  
58  
59  
60

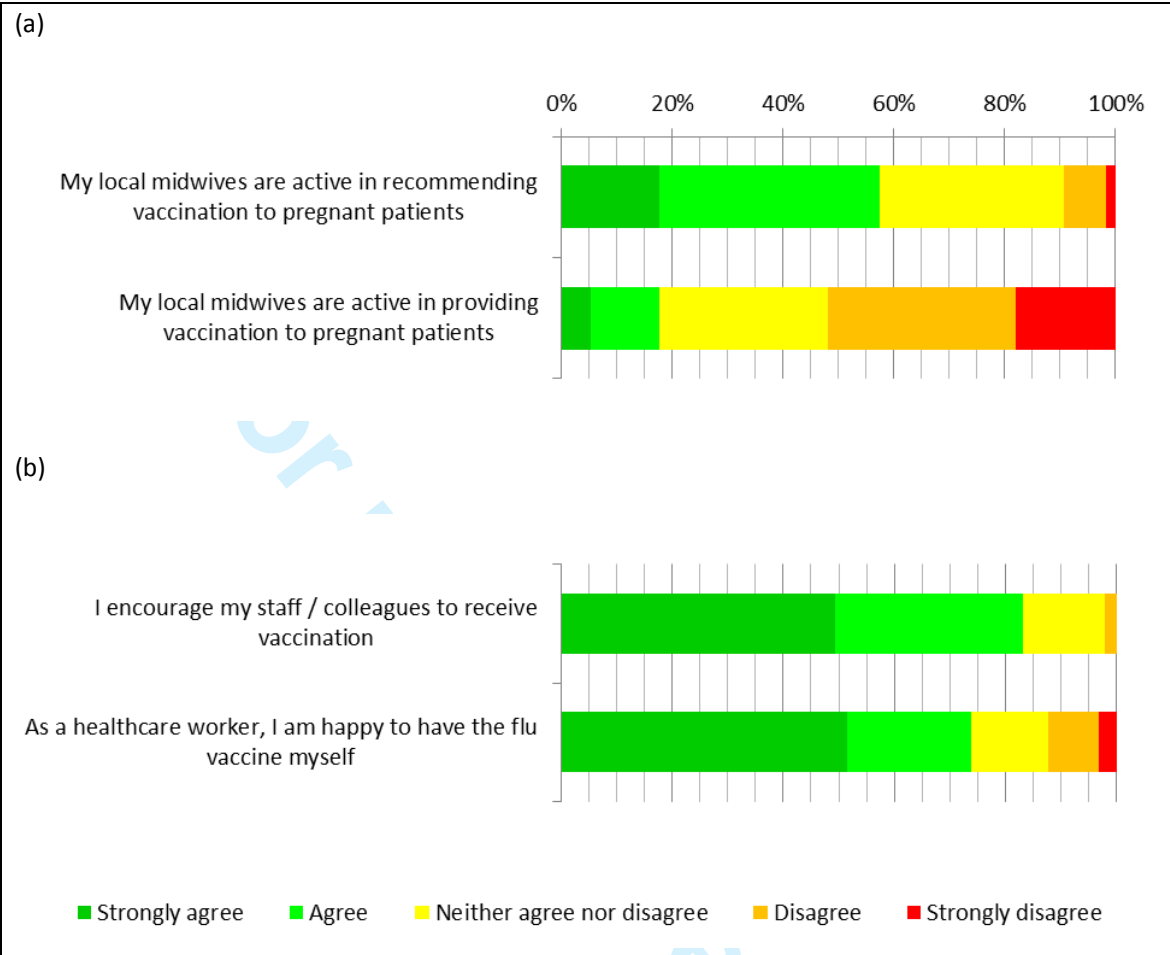

1  
2  
3 *Table 1a*

4 Statistically significant factors found on multivariate regression analysis of responses common to all three types of staff (GPs, nursing staff and practice managers)  
5  
6  
7  
8  
9  
10  
11  
12  
13  
14  
15  
16  
17  
18  
19  
20  
21  
22  
23  
24  
25  
26  
27  
28  
29  
30  
31  
32  
33  
34  
35  
36  
37  
38  
39  
40  
41  
42  
43  
44  
45  
46  
47  
48  
49

For peer review only



1  
2  
3  
4  
5  
6  
7  
8  
9  
10  
11  
12  
13  
14  
15  
16  
17  
18  
19  
20  
21  
22  
23  
24  
25  
26  
27  
28  
29  
30  
31  
32  
33  
34  
35  
36  
37  
38  
39  
40  
41  
42  
43  
44  
45  
46  
47  
48  
49

| Description of significant factor                                                  | Regression co-efficient | 95% CI        | p-value | Number of clusters |
|------------------------------------------------------------------------------------|-------------------------|---------------|---------|--------------------|
| <i>For patients aged ≥65 years</i>                                                 |                         |               |         |                    |
| Producing a written report to review flu vaccine uptake rates                      | 0.065                   | 0.023 – 0.107 | 0.010   | 659                |
| Having a lead member of staff for planning the practice’s flu vaccination campaign | 0.144                   | 0.035 – 0.253 | 0.010   | 659                |
| Sending a personal invitation to all eligible patients                             | 0.081                   | 0.035 – 0.127 | 0.001   | 659                |
| Only stopping vaccination when QOF targets are reached                             | 0.085                   | 0.004 – 0.166 | 0.039   | 659                |
| <i>For at-risk patients aged &lt;65 years</i>                                      |                         |               |         |                    |
| Producing a written report to review flu vaccine uptake rates                      | 0.113                   | 0.042 – 0.184 | 0.002   | 783                |
| Having a lead member of staff for planning the practice’s flu vaccination campaign | 0.203                   | 0.054 – 0.352 | 0.008   | 783                |

review only

1  
2  
3  
4  
5  
6  
7  
8  
9  
10  
11  
12  
13  
14  
15  
16  
17  
18  
19  
20  
21  
22  
23  
24  
25  
26  
27  
28  
29  
30  
31  
32  
33  
34  
35  
36  
37  
38  
39  
40  
41  
42  
43  
44  
45  
46  
47  
48  
49

*Table 1b*

Statistically significant factors found on multivariate regression analysis of responses from practice managers only

For peer review only

1  
2  
3  
4  
5  
6  
7  
8  
9  
10  
11  
12  
13  
14  
15  
16  
17  
18  
19  
20  
21  
22  
23  
24  
25  
26  
27  
28  
29  
30  
31  
32  
33  
34  
35  
36  
37  
38  
39  
40  
41  
42  
43  
44  
45  
46  
47  
48  
49

| Description of significant factor                                                                            | Regression co-efficient | 95% CI        | p-value | Number of clusters |
|--------------------------------------------------------------------------------------------------------------|-------------------------|---------------|---------|--------------------|
| <i>For patients aged ≥65 years</i>                                                                           |                         |               |         |                    |
| Identifying eligible patients using a modified manufacturer’s search program                                 | 0.115                   | 0.056 – 0.175 | 0.000   | 395                |
| Identifying eligible patients using an in-house search program                                               | 0.096                   | 0.028 – 0.163 | 0.006   | 395                |
| Having a lead member of staff for identifying eligible patients in the practice                              | 0.086                   | 0.001 – 0.170 | 0.046   | 395                |
| <i>For at-risk patients aged &lt;65 years: no significant factors were identified by multiple regression</i> |                         |               |         |                    |

Peer review only

1  
2  
3 *Supplementary table 1*

4  
5 Showing results of linear regression analyses of relationship between seasonal flu vaccination uptake rates, for patients aged 65+ (clear cells) and patients aged under 65  
6  
7 (shaded cells), by ethnicity; deprivation; and Quality and Outcomes Framework summary scores [n = 795].  
8  
9  
10  
11  
12  
13  
14  
15  
16  
17  
18  
19  
20  
21  
22  
23  
24  
25  
26  
27  
28  
29  
30  
31  
32  
33  
34  
35  
36  
37  
38  
39  
40  
41  
42  
43  
44  
45  
46  
47  
48  
49

For peer review only

1  
2  
3  
4  
5  
6  
7  
8  
9  
10  
11  
12  
13  
14  
15  
16  
17  
18  
19  
20  
21  
22  
23  
24  
25  
26  
27  
28  
29  
30  
31  
32  
33  
34  
35  
36  
37  
38  
39  
40  
41  
42  
43  
44  
45  
46  
47  
48  
49

| Factor                                                | Regression coefficient | 95% confidence interval | p-value |
|-------------------------------------------------------|------------------------|-------------------------|---------|
| Increasing proportion of white ethnicity              | 0.015                  | -0.014 to 0.043         | 0.305   |
|                                                       | -0.140                 | -0.167 to -0.114        | <0.001  |
| Increasing index of multiple deprivation (IMD) score  | -0.0009                | -0.0015 to -0.0007      | <0.001  |
|                                                       | 0.0001                 | -0.0017 to 0.0004       | 0.380   |
| Increasing Quality and Outcomes Framework (QOF) score | 1.430                  | 1.299 to 1.561          | <0.001  |
|                                                       | 0.918                  | 0.781 to 1.054          | <0.001  |

Peer review only

1  
2  
3 *Supplementary table 2*

4  
5 Showing factor analysed, number of respondents, and results of logistic regression analyses of responses with respect to flu vaccination uptake rates in patients aged  
6  
7 65 years and over (clear boxes), uptake rates in patients aged under 65 years (shaded boxes) and uptake rates in otherwise healthy pregnant women (hatched boxes).  
8  
9 Calculations were performed using Stata and incorporate robust cluster adjustment to reflect the number of responding practices (where appropriate).  
10  
11  
12  
13  
14  
15  
16  
17  
18  
19  
20  
21  
22  
23  
24  
25  
26  
27  
28  
29  
30  
31  
32  
33  
34  
35  
36  
37  
38  
39  
40  
41  
42  
43  
44  
45  
46  
47  
48  
49

For peer review only

| Factor                                                                        | Respondents |     |     | Baseline                                                   | Comparator                                      | Regression co-efficient | 95% confidence interval          | p-value        | Number of clusters |
|-------------------------------------------------------------------------------|-------------|-----|-----|------------------------------------------------------------|-------------------------------------------------|-------------------------|----------------------------------|----------------|--------------------|
|                                                                               | PM          | PN  | GP  |                                                            |                                                 |                         |                                  |                |                    |
| Lead member of staff for planning seasonal flu vaccination                    | 568         | 336 | 105 | No                                                         | Yes                                             | 0.185<br>0.220          | 0.075 – 0.295<br>0.069 – 0.371   | 0.001<br>0.004 | 783                |
| Dedicated member of staff for identifying eligible patients                   | 414         | N/A | N/A | No                                                         | Yes                                             | 0.087<br>0.080          | 0.005 – 0.169<br>-0.048 – 0.208  | 0.038<br>0.218 | 397                |
| Use of a dedicated IT code to record appointment bookings for vaccination     | 414         | N/A | N/A | No                                                         | Yes                                             | 0.006<br>0.092          | -0.054 – 0.066<br>0.005 – 0.179  | 0.844<br>0.038 | 380                |
| Methods used to encourage patients to attend for vaccination                  | 415         | 304 | 107 | General publicity only                                     | General publicity & personal invitation for all | 0.105<br>0.010          | 0.032 – 0.177<br>-0.019 – 0.226  | 0.005<br>0.097 | 662                |
|                                                                               |             |     |     | General publicity & personal invitation for non-responders | General publicity & personal invitation for all | 0.074<br>0.042          | 0.025 – 0.124<br>-0.243 – 0.109  | 0.003<br>0.215 |                    |
| Personal invitation methods used to invite patients to attend for vaccination | 362         | N/A | N/A | Letter <i>or</i> telephone calls                           | Letter <i>and</i> telephone calls               | 0.011<br>-0.009         | -0.051 – 0.073<br>-0.107 – 0.882 | 0.721<br>0.852 | 338                |
| Number of reminders provided if the patient does not respond                  | 320         | N/A | N/A | Increasing numbers of reminders                            |                                                 | -0.018<br>0.041         | -0.047 – 0.011<br>0.002 – 0.079  | 0.225<br>0.038 | 309                |
| Vaccination is offered before 8am                                             | 395         | 295 | N/A | No                                                         | Yes                                             | 0.014<br>-0.032         | -0.041 – 0.069<br>-0.111 – 0.048 | 0.625<br>0.434 | 596                |
| Vaccination is offered after 6pm                                              | 395         | 295 | N/A | No                                                         | Yes                                             | 0.015<br>0.011          | -0.030 – 0.061<br>-0.054 – 0.077 | 0.506<br>0.733 | 595                |
| Vaccination is offered at weekends                                            | 395         | 295 | N/A | No                                                         | Yes                                             | -0.005<br>0.003         | -0.054 – 0.044<br>-0.996 – 0.105 | 0.834<br>0.961 | 594                |
| Local midwives recommend vaccine to pregnant women                            | 369         | N/A | N/A | Do not agree                                               | Agree                                           | 0.050                   | -0.087 – 0.187                   | 0.474          | 356                |
| Local midwives provide vaccine to pregnant women                              | 376         | NA  | NA  | Do not agree                                               | Agree                                           | 0.178                   | 0.024 – 0.333                    | 0.023          | 356                |
| Vaccination campaign is stopped when QOF targets are reached                  | 565         | 334 | 106 | No                                                         | Yes                                             | 0.078<br>0.070          | 0.001 – 0.155<br>-0.014 – 0.153  | 0.048<br>0.100 | 791                |
| How flu vaccination uptake rates are reviewed                                 | 565         | 334 | 106 | No written report                                          | Written report                                  | 0.057<br>0.119          | 0.016 – 0.098<br>0.044 – 0.195   | 0.006<br>0.002 | 791                |
| How the practice flu vaccination strategy is reviewed                         | 543         | N/A | 87  | No written report                                          | Written report                                  | 0.076<br>0.175          | -0.005 – 0.158<br>0.019 – 0.330  | 0.067<br>0.028 | 559                |
| Staff encourage colleagues to receive vaccination                             | 350         | 253 | 106 | Do not agree                                               | Agree                                           | 0.079<br>0.055          | 0.026 – 0.132<br>-0.030 – 0.139  | 0.004<br>0.208 | 575                |
| Staff themselves happy to have the flu vaccine                                | 347         | 253 | 106 | Do not agree                                               | Agree                                           | 0.019<br>0.060          | -0.029 – 0.067<br>-0.029 – 0.149 | 0.440<br>0.185 | 574                |

1  
2  
3  
4  
5  
6  
7  
8  
9  
10  
11  
12  
13  
14  
15  
16  
17  
18  
19  
20  
21  
22  
23  
24  
25  
26  
27  
28  
29  
30  
31  
32  
33  
34  
35  
36  
37  
38  
39  
40  
41  
42  
43  
44  
45  
46  
47  
48  
49

For peer review only



**TITLE:**

**Strategies to Increase Influenza Vaccination Rates: Outcomes of a Nationwide Cross-sectional Survey of UK General Practice**

**AUTHORS:**

Laura J Dexter, M Dawn Teare, Matthew Dexter, A Niroshan Siriwardena, Robert C Read

**AUTHORS' ADDRESSES AND POSITIONS:**

Academic Unit of Immunology and Infectious Diseases, Department of Infection and Immunity, The University of Sheffield Medical School, Beech Hill Road, Sheffield, S10 2RX, United Kingdom

Laura J Dexter

NIHR Clinical Lecturer in Virology

Health Services Research, School of Health and Related Research, University of Sheffield, Regent Court, 30 Regent Street, Sheffield, S1 4DA, United Kingdom

M Dawn Teare

Lecturer in Medical Epidemiology

Retford Health, Retford Primary Care Centre, North Road, Retford, DN22 7XF, United Kingdom

Matthew Dexter

General Practitioner

Lincoln School of Health and Social Care, University of Lincoln, Brayford Pool, Lincoln, LN6 7TS, United Kingdom

1  
2  
3 A Niroshan Siriwardena

4  
5 Professor of Primary and Pre-hospital Health Care

6  
7  
8  
9 Department of Infection and Immunity, The University of Sheffield Medical School, Beech Hill Road

10  
11 Sheffield, S10 2RX, United Kingdom

12  
13 Robert C Read [guarantor]

14  
15 Professor of Infectious Diseases

16  
17  
18  
19  
20 Correspondence to: L J Dexter [l.dexter@sheffield.ac.uk](mailto:l.dexter@sheffield.ac.uk)

21  
22  
23  
24  
25 The Corresponding Author has the right to grant on behalf of all authors and does grant on behalf of  
26  
27 all authors, an exclusive licence (or non exclusive for government employees) on a worldwide basis to  
28  
29 the BMJ Publishing Group Ltd and its licensees, to permit this article (if accepted) to be published in  
30  
31 BMJ editions and any other BMJPG products and to exploit all subsidiary rights, as set out in our  
32  
33 licence (<http://resources.bmj.com/bmj/authors/checklists-forms/licence-for-publication>).  
34  
35  
36  
37  
38  
39  
40  
41  
42  
43  
44  
45  
46  
47  
48  
49  
50  
51  
52  
53  
54  
55  
56  
57  
58  
59  
60

## ABSTRACT

### *Objective*

To identify practice strategies associated with higher flu vaccination rates in primary care.

### *Design*

Logistic regression analysis of data from a cross-sectional online questionnaire

### *Setting*

795 general practices across England

### *Participants*

569 practice managers, 335 nursing staff and 107 GPs

### *Primary outcome measures*

Flu vaccination rates achieved by each practice in different groups of at-risk patients.

### *Secondary outcome measures*

~~Practice level deprivation and ethnicity data; QOF summary scores~~

### *Results*

Seven independent factors associated with higher vaccine uptake were identified. Having a lead staff member for planning the flu campaign and producing a written report of practice performance predicted an 8% higher vaccination rate for at-risk patients aged <65 years (OR 1.37; 95% CI 1.10 to 1.71). These strategies, plus sending a personal invitation to all eligible patients and only stopping vaccination when QOF targets are reached, predicted a 7% higher vaccination rate (OR 1.45; 95% CI 1.10 to 1.92) in patients ≥65 years. Using a lead member of staff for identifying eligible patients, with

1  
2  
3 either a modified manufacturer's or in-house search program for interrogating the practice IT system,  
4  
5 independently predicted a 4% higher vaccination rate in patients aged  $\geq 65$  years (OR 1.22; 95% CI  
6  
7 1.06 to 1.41 / OR 1.20; 95% CI 1.03 to 1.40). The provision of flu vaccine by midwives was associated  
8  
9 with a 4% higher vaccination rate in pregnant women (OR 1.19; 1.02 to 1.40).  
10

### 11 12 13 14 *Conclusion*

15  
16 Clear leadership, effective communication about performance, and methods used to identify and  
17  
18 contact eligible patients were independently associated with significantly higher rates of flu  
19  
20 vaccination. Financial targets appear to incentivise practices to work harder to maximise seasonal  
21  
22 influenza vaccine uptake. The strategies identified here could help primary care providers to  
23  
24 substantially increase their seasonal flu vaccination rates towards or even above the CMO's targets.  
25  
26  
27  
28  
29  
30  
31  
32  
33  
34  
35  
36  
37  
38  
39  
40  
41  
42  
43  
44  
45  
46  
47  
48  
49  
50  
51  
52  
53  
54  
55  
56  
57  
58  
59  
60

## ARTICLE SUMMARY

### *Article focus*

- Uptake of seasonal influenza vaccination in the UK's at-risk population is below the national and international target of 75%.
- Evidence-based guidance, to advise practices how to optimise all aspects of their flu vaccination campaigns and maximise their likelihood of protecting at-risk patients against flu and its serious sequelae, is greatly needed.
- This study sought to identify which strategies and procedures were associated with higher rates of flu vaccine uptake.

### *Key messages*

- This study has identified seven key strategies that were significantly associated with the success of practices' seasonal flu vaccination campaigns.
- If widely implemented by GP practices, average vaccination rates would be predicted to rise by 7-8% (thereby exceeding the WHO target in patients >65 years).

### *Strengths and limitations of this study*

- The study sample was large and representative, despite a participation rate of only 27.5%.
- Outcome measures (vaccination rates) were objective and corrected for practice size.
- Strategies used to provide and encourage vaccination were self-reported.

## INTRODUCTION

### *Influenza*

Influenza (flu) is a common, potentially severe, but preventable infection that places a high burden on patients and healthcare providers <sup>1 2</sup>. A safe and effective inactivated (killed) vaccine is produced ahead of each flu season, based on strain recommendations provided by the World Health Organisation (WHO), and is offered to at-risk groups in the UK free of charge <sup>3-6</sup>. These groups have been chosen based on evidence showing increased risk of severe flu infection or sequelae: epidemiological data from 2010-2011 indicated that patients in a risk group due to chronic disease had a 10-fold greater risk of mortality due to influenza, compared to those who were not in an at-risk group <sup>1</sup>. During the 2010-2011 flu season 602 deaths in the UK were due directly to influenza <sup>1</sup>. Of those who died, approximately two-thirds were in a clinical risk group that is targeted for vaccination, while only 25% had received vaccination for that season.

WHO guidance indicates that developed countries should achieve 75% influenza vaccine coverage in the elderly, while the European Union Council (EC) advises that members should aim to vaccinate 75% of all those at high risk from influenza infection <sup>7 8</sup>. England's Chief Medical Officer (CMO) has instructed that, in 2011-12, each practice should aim to reach or exceed 75% uptake for people aged 65 years or over, and 60% uptake for at-risk people under age 65 (increasing to 75% by 2013/14) <sup>6</sup>. Published data suggests that approximately 27% of England's population was eligible for free flu vaccination in 2010 <sup>9 10</sup>. Providing seasonal influenza vaccination is a large and complex task which is performed well in the UK, in comparison to many other European countries <sup>11</sup>. Over 10 million patients were vaccinated in England in the 2010-11 season: each general practice vaccinating an average of approximately 1000 patients, mostly within a period of 4-6 weeks. The proportion of people aged over 65 years in England who received the 2010/11 influenza vaccine was, at 72.8%, just below the target of 75% <sup>9</sup>. However, both past and current rates of vaccination in the under-65 at-risk groups fall far short of the EC or CMO targets: during 2010/11 the rate achieved was 50.4%; in

1  
2 pregnant women who were not otherwise at risk it was only 36.6%, despite increasing evidence  
3 showing the beneficial effects of protection against flu for both mothers and babies<sup>9 12-14</sup>.  
4  
5  
6  
7

8  
9 A few previous studies have investigated the utility of specific interventions (such as telephone calls  
10 or letters) to generate an increase in uptake, but an optimal overall strategy for primary care  
11 providers remains undefined<sup>15 16</sup>. In this study, we aimed to investigate the entire process of flu  
12 vaccine provision in a wide range of UK general practices, in order to determine the correlates of  
13 higher vaccine uptake and to inform comprehensive, evidence-based recommendations for best  
14  
15  
16  
17  
18  
19  
20  
21  
22  
23  
24  
25  
26  
27  
28  
29  
30  
31  
32  
33  
34  
35  
36  
37  
38  
39  
40  
41  
42  
43  
44  
45  
46  
47  
48  
49  
50  
51  
52  
53  
54  
55  
56  
57  
58  
59  
60 practice.

Peer review only

## METHODS

### *Survey development*

Individual or small-group interviews with GPs, nurses and practice managers from six practices already achieving high rates of flu vaccination in urban (city), semi-rural (market town) and rural (village) areas were carried out, during which staff were asked to identify the factors considered by practices in designing and carrying out their flu vaccination campaigns. The information gained was used to construct three online questionnaires (one each for the participating groups of GPs, practice managers and practice nurses), using the Survey Monkey web-based software<sup>17</sup>. The format of the questions and the layout of the questionnaires were designed to optimise the statistical utility of the data to be collected. The questionnaires were piloted in the same six practices to further ascertain relevance and usability before final distribution.

### *Questionnaire distribution and survey participants*

We aimed to distribute the questionnaires to all registered GPs, practice nursing staff and practice managers within four Strategic Health Authorities (SHAs) (East Midlands, London, West Midlands and Yorkshire and Humber), which together provide care for approximately 40% of the UK population.

Details about the survey were sent via the Public Health teams in the participating SHAs ~~and Primary Care Trusts (PCTs)~~, who were requested to cascade the information to all members of individual primary care teams (GPs, nurses and practice managers) in their area via normal electronic information circulation mechanisms. The same method was used for all other communications with ~~practice staff~~ participants during the study. A preliminary e-mail, containing a letter informing primary care teams about the forthcoming study, was distributed two weeks before the first survey invitation. Two emails, inviting participation in the survey and containing web links to the online questionnaires, were then distributed in two consecutive weeks during August 2011.



### *Vaccine uptake data and other comparators*

The Immform web service, which is a UK Department of Health website for collecting vaccination data from general practices, was used to obtain practice-level flu vaccination uptake data for the period 1<sup>st</sup> September 2010 – 28<sup>th</sup> February 2011<sup>18</sup>. Actual numbers vaccinated and actual numbers eligible were recorded for 65+ year olds and at-risk ~~groups of~~ <65 year olds (including pregnant women). These are standard groups used for targeting and measuring influenza vaccine uptake by the WHO), in addition to data showing the. Total practice population size was also recorded. Other practice-level data, including summary Quality and Outcomes Framework (QOF) scores (most recent data available, for April 2009-March 2010) and a variety of demographic measures, were obtained in order to identify and/or adjust for other factors which may differentially affect vaccine uptake rates (such as overall practice quality performance, practice size, population ethnicity or population deprivation)<sup>19 20</sup>. QOF is a programme of annual financial rewards for GP surgeries, which forms part of the GP contract in England and Wales<sup>21</sup>. The above information was linked to the questionnaire responses by NHS practice code (a unique six-figure identifier); codes were then removed from the dataset prior to analysis.

### *Statistical analyses*

~~In analysing the responses to the questionnaires, we sought to identify: differences in routine strategies and procedures in flu vaccination campaigns within the different areas surveyed; whether and how these were associated with vaccine uptake rates; and other co-factors associated with vaccine uptake rates.~~ In addition to a full descriptive analysis of the variables recorded in the questionnaires, logistic regression analyses were performed using STATA to compare the proportions of patients vaccinated across different categorical responses in the survey questionnaire. The logistic regression was based upon absolute numbers of patients vaccinated out of the total at-risk, to account for differences in at-risk practice population size. Potentially confounding variables, such as total practice size, Index of Multiple deprivation and proportion white ethnicity, were analysed for

1  
2  
3 [correlation with vaccination uptake and adjusted for in the univariable analyses where appropriate.](#)

4  
5 As there was not always complete agreement between responses from different participants in the  
6  
7 same practice, robust standard errors were computed using a cluster correction model, thereby  
8  
9 generating data corrected to the practice level. Multivariate regression analysis was [then](#) performed  
10  
11 on any 2 or more results from the same [groupsubset\(s\)](#) of participants ([i.e. practice managers, nurses](#)  
12  
13 [and/or GPs](#)) which showed significance at the 95% level on univariable analysis. ~~We then used the~~  
14  
15 ~~outcomes of these statistical analyses to identify and evaluate the best strategies for carrying out~~  
16  
17 ~~successful and effective flu vaccination campaigns and how (or indeed whether) these may be broadly~~  
18  
19 ~~or specifically adopted.~~  
20  
21  
22  
23  
24  
25  
26  
27  
28  
29  
30  
31  
32  
33  
34  
35  
36  
37  
38  
39  
40  
41  
42  
43  
44  
45  
46  
47  
48  
49  
50  
51  
52  
53  
54  
55  
56  
57  
58  
59  
60

## RESULTS

Fifty PCTs distributed the survey invitation to a total of 2896 practices. Responses were submitted by 569 practice managers, 335 nursing staff and 107 GPs, representing 795 practices (27.5% of those invited to contribute). These practices serve a total of approximately 5.8 million patients, among whom over 1.5 million are eligible for influenza vaccination. The distributions of flu vaccination rates in the surveyed practices were well matched to national patterns (Figure 1). For the majority of eligible patients (i.e. those aged 65 years and above), our findings indicated that the variation between practices' flu vaccination rates was not influenced by differences in the ethnicity or affluence of their patient populations, whereas Quality and Outcomes Framework summary scores showed highly and significant positive correlations with vaccine uptake achieved in both age groups (supplementary table 1). The univariable logistic regression results referred to throughout this section are shown in supplementary table 2.

### *Staffing*

Having a lead member of staff for arranging the practice flu vaccination campaign was associated with increased flu vaccine uptake rates in both 65+ and <65 age groups ( $p = 0.001$  and  $0.004$  respectively). Nominating a staff member with responsibility for identifying eligible patients was associated with increased uptake of vaccine in older age groups ( $p = 0.038$ ), but this trend, although present, did not reach significance in under 65s ( $p = 0.218$ ).

### *Ordering vaccine*

A plot of the number of vaccine doses ordered for 2011-12 versus vaccines used in 2010-11 shows a tight correlation (figure 2a). On average, practices were found to have ordered vaccines based on the number of doses given in the previous season, with an average uplift of 8.8% (95% confidence interval 4.3 – 13.3%;  $n = 568$ ). As vaccines are ordered as a total, these data could not be differentiated into

1  
2  
3 doses intended for vaccination of patients aged over or under 65 years old. However, the data  
4  
5 showed that only 78.3% of responding practices would have been able to vaccinate at least 75% of  
6  
7 their at-risk patients (in accordance with the CMO recommendations) (figure 2b).  
8  
9

### 10 11 12 *Contacting patients*

13  
14 Using personal invitations, either alone or in combination with general publicity, was significantly  
15  
16 associated with higher rates of vaccination. The use of personal invitations for all patients (not just  
17  
18 those who did not respond to an initial general publicity campaign) was associated with the highest  
19  
20 vaccination rates in the larger, 65+ age group ( $p = 0.003$ ), although a similar association did not reach  
21  
22 statistical significance in the under 65s. Using both letters and telephone calls was not associated with  
23  
24 significantly different vaccination rates than using either letters or phone calls alone ( $p = 0.721$  for  
25  
26 patients aged 65+;  $p = 0.852$  for patients aged <65).  
27  
28  
29  
30  
31  
32

### 33 *Identifying eligible patients*

34  
35 Programmes for identifying eligible patients from the practices' IT system are usually issued by the  
36  
37 software providers. Modifying the IT supplier's standard search or creating a separate in-house search  
38  
39 was associated with significantly higher uptake rates for patients aged 65+ than using an unmodified  
40  
41 IT supplier's search ( $p < 0.001$  and  $0.027$ , respectively). A similar trend for under 65s did not reach  
42  
43 statistical significance, perhaps due to insufficient power. As older patients are identified simply on  
44  
45 the basis of their age at a certain date, which should not require a complicated search strategy, these  
46  
47 findings suggest that creating or modifying a system search reflects that the staff in these practices  
48  
49 are more motivated and/or experienced to use their IT system to try to achieve their flu vaccination  
50  
51 targets.  
52  
53  
54  
55  
56  
57  
58  
59  
60

### *Offering clinics and appointments*

More than 95% of practices held the main vaccination sessions at their usual surgery premises and 75% held the main sessions during normal surgery hours. Most practices reported using a variety of appointment types and timings to provide flu vaccination. Surprisingly, in our data, offering vaccinations at weekends, or before 8am or after 6pm, was not associated with a significant difference in the vaccination uptake rates achieved. Increasing numbers of reminders or repeat invitations were associated with significantly increased vaccine uptake in the under 65 year olds ( $p = 0.038$ ), though not in those aged 65+. Significantly higher rates of vaccination (for under 65s) occurred in practices that identified appointments for flu vaccination using a specific Read ([computer identification](#)).code ( $p = 0.038$ ).

### *Vaccinating pregnant women*

The proportion of practices that reported that their community midwives recommended flu vaccination to pregnant women was disappointingly low (57.5%). Furthermore, there was a clear discrepancy between this figure and the proportion that reported that their community midwives actually administered vaccine (17.8%; see figure 3a). Our analysis demonstrated that practices where community midwives were active in administering flu vaccinations to pregnant patients achieved significantly higher rates of uptake in this particular at-risk group ( $p = 0.023$ ).

### *Ending and reviewing the campaign*

A total of 578 practices provided information on what influenced their decision to stop offering flu vaccination. Of major concern was the evidence that almost 50% of practices stopped offering flu vaccines partly, or solely, because they had exhausted their stock. Almost one third (28.9%) cited a financial factor in making their decision and the data showed that ending flu vaccination only once QOF targets had been reached was associated with increased uptake rates for those aged 65+ ( $p =$

1  
2  
3 0.048); in those aged under 65 this was only weakly significant ( $p = 0.100$ ), perhaps influenced by the  
4  
5 smaller numbers of patients in this group. These results suggest that practices that focused on  
6  
7 financial targets were motivated and/or organised to continue their efforts to vaccinate patients  
8  
9 beyond the point at which other practices may stop. In support of this hypothesis, we found that  
10  
11 patients whose vaccination would contribute to a QOF-related payment received an average of 42%  
12  
13 (95% CI 33 to 51%) more reminders more than those who did not have a QOF-registered indication  
14  
15 for vaccination ( $p < 0.001$ ).  
16

17  
18 Practices which produced a written report reviewing their flu vaccination rates achieved very  
19  
20 significantly higher vaccination rates in both younger and older age groups, compared to those  
21  
22 practices which did not produce a written report ( $p = 0.006$  for patients aged 65+;  $p = 0.002$  for  
23  
24 patients aged <65 years). Similarly, reviewing the practice's flu vaccination strategy in a written  
25  
26 format was also significantly associated with achieving higher rates of vaccination ( $p = 0.067$  for  
27  
28 patients aged 65+;  $p = 0.028$  for patients aged <65 years). This finding suggests that that practices  
29  
30 which produced written reports may have been able to organise more rigorous campaigns, and/or  
31  
32 have had more well-informed and motivated staff, resulting in more effective performance.  
33  
34  
35  
36  
37  
38

### 39 *Personal motivations and attitudes of staff*

40  
41  
42 Figure 3b shows a summary of GPs', nurses' and practice managers' views of the flu vaccination  
43  
44 campaign. There was a significant association between encouraging vaccination among colleagues  
45  
46 and other staff and achieving higher rates of vaccine uptake in patients aged 65 or above ( $p = 0.004$ ),  
47  
48 but not in those aged under 65 years ( $p = 0.208$ ). There was a trend for a similar association between  
49  
50 positive attitudes of staff towards being vaccinated themselves and higher rates of patient  
51  
52 vaccination in a practice, but this did not reach statistical significance in either the older or younger  
53  
54 age group ( $p = 0.440$  and  $0.185$  respectively).  
55  
56  
57  
58  
59  
60

1  
2  
3 *Predicted impact of strategies to increase rates of influenza vaccination*  
4

5  
6 Seven factors were found to have significant, independent positive associations with flu vaccine  
7  
8 uptake levels following multivariable regression analysis (Tables 1a and 1b). For patients aged <65  
9  
10 years, having a lead member of staff for planning the flu campaign and producing a written report of  
11  
12 the practice's performance were associated with a combined odds ratio of 1.37, which predicts an 8%  
13  
14 higher flu vaccination rate for practices that employ these strategies compared to those that do not  
15  
16 (54% vs. 46%).  
17

18  
19 In patients aged 65 or over, a further two factors were also found to remain independently correlated  
20  
21 with increased rates of flu vaccination. These were sending a personal invitation to all eligible patients  
22  
23 and only stopping vaccination when QOF targets are reached. The overall odds ratio associated with  
24  
25 the implementation of all four strategies in this age group was 1.45, which predicts a 7% higher  
26  
27 vaccination rate in this age group when these strategies are used (78% vs. 71%).  
28

29  
30 The strategies of using a lead member of staff for identifying eligible patients and either a modified  
31  
32 manufacturer's search program or an in-house search program for interrogating the practice IT  
33  
34 system were also independently correlated with increased rates of flu vaccination in patients aged 65  
35  
36 years or more. However, the effect seen was weaker as this data is derived from a subset of  
37  
38 responses from practice managers only, suggesting a rise to 78% from a baseline of 74%.  
39

40  
41 The active involvement of midwives in providing flu vaccination was significantly associated with  
42  
43 higher levels of vaccine uptake in pregnant women but, as the only significant variable within this  
44  
45 group, the finding could not be included in a multivariable analysis. However, applying the odds ratio  
46  
47 of 1.20 predicted by the univariable analysis, our data indicates that the provision of vaccination by  
48  
49 midwives rather than GPs is associated with an increase in uptake rate to 45% in pregnant women  
50  
51 (from an observed average baseline vaccination rate of 41% in our cohort).  
52  
53  
54  
55  
56  
57  
58  
59  
60

## DISCUSSION

This study has identified seven factors which GPs might use to improve and maximise uptake of seasonal flu vaccine in at-risk patients. Many of these strategies are common sense and align with the empirical guidance given by the English and Scottish CMOs<sup>22 23</sup>, but our study provides the first statistical evidence to support the validity of such approaches. The study sample was large and appeared to be representative of the overall cohort, despite a participation rate of only 27.5%. Although we found no evidence for selection bias of participating practice staff, when the vaccination rates of participating practices were compared with national data, it remains possible that the responses of staff who completed the questionnaire did not reliably represent the views of all practice staff within those participating practices. However, most of our questions sought factual data rather than opinions and so this bias, if present, is likely to be limited.

[This study focused on identifying strategies and approaches that GPs might use or influence to improve vaccine uptake. However, numerous patient-related factors also affect flu vaccine uptake. Highly mobile or ethnically diverse populations may prove very difficult to contact and target for flu vaccination. It is also likely that a minority of patients will always refuse or miss vaccination, no matter how much GPs strive to provide it.](#)

Public perception of influenza as a significant threat to health and of vaccination as an effective preventative strategy is associated with higher uptake<sup>24</sup>. People who receive information about these factors from official health sources (particularly GPs or nurses in the primary care setting) and who think that others want them to be vaccinated are more likely to get vaccinated<sup>11 24 25</sup>. In line with this, flu vaccination uptake is greater among older people and others who make routine use of hospital and community care services<sup>26</sup>. Unsurprisingly, fear of side-effects of vaccination is a strong negative influence, while lack of general motivation and ignorance about the recommendations are other commonly reported barriers to both seasonal and pandemic vaccination<sup>27 28</sup>. However, when intensive recall stimuli and information are provided to at-risk patients, as few as 3.5% will refuse vaccination, suggesting that patient attitudes are malleable



1  
2 and should not present a barrier to achieving the CMO's aims <sup>29</sup>. Our results strongly support the  
3  
4 provision of personal invitations for all patients (in alternative languages and/or formats, if required),  
5  
6 as advised by the CMO <sup>22</sup>. However, we found little evidence of benefit from offering very early  
7  
8 (before 8am), late (after 6pm) or weekend appointments. This contradicts some current guidance <sup>22</sup>  
9  
10 and is likely to be of financial relevance for practices. Our findings with respect to the flu vaccination  
11  
12 of pregnant women are also important. Although administering flu vaccine is not part of the current  
13  
14 role of many midwives, it is logical that the ability both to discuss and to provide vaccination to  
15  
16 pregnant women would increase uptake in this risk group by removing the need for referral and  
17  
18 attendance at a separate clinic: our analyses now support this logic. However, if midwives were to  
19  
20 provide influenza vaccination outside of the practice setting, it would be essential for reliable records  
21  
22 of this to be transferred to the GP  
23  
24  
25

26  
27 The need for good communication with patients, to encourage the uptake of flu vaccination, is  
28  
29 axiomatic. However, several statistically significant outcomes of our analyses have not previously  
30  
31 been described and are directly or indirectly associated with the quality or extent of communication  
32  
33 *within* practices. The production of a written review of practice performance might be associated with  
34  
35 higher flu vaccination rates for a number of reasons. Production of such a report indicates that at  
36  
37 least one member of staff must be able to access and manipulate the relevant data using their  
38  
39 practice's computer systems, and is motivated to do so. Subsequent dissemination of the report  
40  
41 allows staff to become aware of their practice's performance and identify areas for improvement.  
42  
43 Only 20% of practices in our study produced a written report of vaccine uptake rates and this strategy  
44  
45 is not currently recommended in the CMO guidance for England. Our results also indicate that each  
46  
47 practice should nominate lead members of staff not only for organising the practice's influenza  
48  
49 vaccination campaign (as advised by the English and Scottish CMOs <sup>22 23</sup>, but also for identifying at-risk  
50  
51 patients from the practice database. This is supported by a recently published study from the US,  
52  
53 which suggested that effective use of electronic databases by a skilled data manager could increase  
54  
55 the rate of flu vaccination by over 10% <sup>30</sup>. The ability to perform a modified or in-house search of the  
56  
57  
58  
59  
60

1  
2  
3  
4  
5  
6  
7  
8  
9  
10  
11  
12  
13  
14  
15  
16  
17  
18  
19  
20  
21  
22  
23  
24  
25  
26  
27  
28  
29  
30  
31  
32  
33  
34  
35  
36  
37  
38  
39  
40  
41  
42  
43  
44  
45  
46  
47  
48  
49  
50  
51  
52  
53  
54  
55  
56  
57  
58  
59  
60

practice's patient database is unlikely to improve the simple process of identification of those aged over 65 years. However, a member of staff who is thoroughly familiar with the IT system may be more able to contribute to improved rates of vaccination by, for example: monitoring levels of appointment bookings and vaccine uptake in real-time throughout the campaign; generating automatic invitation and reminder letters, text messages or emails; creating alert flags on the patient record to promote opportunist vaccination. Our study's findings also suggest that the effectiveness of a practice's flu vaccination campaign is increased when staff promote vaccination among themselves, an effect which may arise from increased motivation for the campaign as a whole or through communication of their positive attitude to at-risk patients. This supports the findings of previous studies and should thus contribute to an increased impetus to encourage vaccination of staff<sup>31 32</sup>.

The relationship between staff motivation and practice performance is neither simple nor exclusive. Individuals may have different motivations and their interaction within a larger team may produce variable outcomes. We do not argue that introducing written reports and/or tailoring the practice search strategies would necessarily increase motivation. However, in practices where these actions are not already undertaken, their introduction would ensure that staff become more aware of the practice's performance and the underlying mechanisms that influence it. Having found a highly significant correlation of these strategies with increased vaccine uptake, we propose that increased awareness and knowledge may help to increase staff motivation. However, our study was not designed to measure motivation per se or its effects in isolation and this would be an interesting (though challenging) area for further study.

There is currently a significant financial risk for practices attempting to improve their vaccination rates. As practices are only reimbursed on the basis of the number of vaccines administered, they face a financial penalty if they buy more doses than are used and sale-or-return schemes are usually limited to a few percent of the vaccine doses in the overall order. Perhaps as a result, we have found that almost 50% of practices currently halt their vaccination campaigns due to exhaustion of vaccine stocks. A central procurement strategy for flu vaccines, which has recently undergone consultation by

1  
2  
3 the Department of Health, should remove this financial stricture and allow practices to aim for much  
4  
5 higher vaccination rates without risking financial penalty<sup>33</sup>. However, this will also result in the loss of  
6  
7 a significant proportion of practices' funding for flu vaccination (i.e. that which is currently derived  
8  
9 from any discrepancy between tariff price and purchased price for the vaccine itself). Considerable  
10  
11 effort and resources are required to deliver a successful flu vaccination campaign, and our findings  
12  
13 indicate that practices' efforts can be influenced by financial motivations. The pursuit of QOF targets  
14  
15 for flu vaccination requires practice staff to be able to perform complex interrogations of their patient  
16  
17 database and to be aware of rates of vaccine uptake while the flu vaccination campaign is  
18  
19 progressing. Our data suggests that pursuing the QOF targets may motivate practices to maintain  
20  
21 vaccine stocks and encourage extra patients to receive vaccine. We would not advise that practices  
22  
23 should automatically stop vaccinating patients once their QOF targets have been attained. However,  
24  
25 our findings suggest that a scale of financially-supported targets applicable across all patient groups,  
26  
27 or the inclusion of flu vaccination of all at-risk patients in the QOF scheme, might be a powerful tool  
28  
29 to increase flu vaccine uptake.  
30  
31  
32

33  
34 Current vaccines achieve around 50-80% protection against influenza and associated sequelae in at-  
35  
36 risk groups<sup>3 34-36</sup>. However, these efficacy rates do not translate into public health protection if the  
37  
38 vaccine is not delivered effectively to the communities that need it. With flu vaccination rates varying  
39  
40 from 15 to 100% (Figure 1) between the worst and best practices in our nationwide cohort, there is  
41  
42 the potential for enormous gains to be made. This study has identified seven simple steps that can  
43  
44 improve our performance and increase the protection of at-risk patients.  
45  
46  
47  
48  
49  
50  
51  
52  
53  
54  
55  
56  
57  
58  
59  
60

## ACKNOWLEDGEMENTS

This study was an independent report commissioned and funded by the Policy Research Programme in the Department of Health, UK (reference number 039/0035). The views expressed are not necessarily those of the Department. The study was sponsored and granted ethical approval by the University of Sheffield. We are grateful to the survey participants for taking part; to Dr Mark Ashworth, GP and Clinical Senior Lecturer at King's College London for providing the demographic and deprivation data; to Dr Helen Carter, Consultant in Public Health at NHS West Midlands, Dr Andrew Clark, Deputy Director of Public Health at NHS Yorkshire and Humber, Dr Giri Rajaratnam, Deputy Regional Director of Public Health at NHS East Midlands, Dr Leslyn Rew, Project Manager at NHS West Midlands and Dr Chloe Sellwood, Pandemic Flu Lead at NHS London and their Vaccination & Immunisation teams for arranging circulation of the survey details to primary care teams; to staff at Bridgegate, Crown House, Riverside, and Tall Trees Surgeries in Retford, Charnock Health Primary Care Centre in Sheffield, and Bawtry and Blyth Health Centre in Bawtry for feedback on questionnaire and guideline design; and to Mr Gerald Ellis, Business Manager at Retford Health for co-ordinating feedback.

Data sharing: the availability of additional data is subject to consent for its dissemination from the Department of Health Central Commissioning Facility. Neither the study sponsor nor the funder played any role in study design; in the collection, analysis, and interpretation of data; in the writing of the report; or in the decision to submit the article for publication. All authors had access to the study data (including statistical reports and tables) and can take responsibility for the integrity of the data and the accuracy of the data analysis.

Contributors: LJD designed, carried out and coordinated analysis and reporting of the study, and also drafted and revised this manuscript. MDT contributed to statistical aspects of design, carried out the

1  
2 formal data analysis and contributed to the manuscript. MD and ANS contributed to primary care and  
3  
4 policy aspects of study design and interpretation and also revised the manuscript. RCR contributed to  
5  
6 study design and interpretation and revised the manuscript. He is guarantor.  
7  
8  
9

10  
11 The Corresponding Author has the right to grant on behalf of all authors and does grant on behalf of  
12  
13 all authors, an exclusive licence (or non exclusive for government employees) on a worldwide basis to  
14  
15 the BMJ Publishing Group Ltd and its licensees, to permit this article (if accepted) to be published in  
16  
17 BMJ editions and any other BMJPG products and to exploit all subsidiary rights, as set out in our  
18  
19 licence (<http://resources.bmj.com/bmj/authors/checklists-forms/licence-for-publication>)  
20  
21  
22  
23

24  
25 All authors have completed the Unified Competing Interest form at [www.icmje.org/coi\\_disclosure.pdf](http://www.icmje.org/coi_disclosure.pdf)  
26  
27 (available on request from the corresponding author) and declare that (1) LJD, MDT, MD, ANS and  
28  
29 RCR have no support from companies for the submitted work; (2) LJD, MDT, MD, ANS and RCR have  
30  
31 no relationships with companies that might have an interest in the submitted work in the previous 3  
32  
33 years; (3) their spouses, partners, or children have no financial relationships that may be relevant to  
34  
35 the submitted work; and (4) LJD, MDT, MD, ANS and RCR have no non-financial interests that may be  
36  
37 relevant to the submitted work.  
38  
39  
40  
41  
42  
43  
44  
45  
46  
47  
48  
49  
50  
51  
52  
53  
54  
55  
56  
57  
58  
59  
60

## REFERENCES

1. Surveillance of influenza and other respiratory viruses in the UK 2010/11. Health Protection Agency, 2011.
2. Fleming DM, Elliot AJ, Nguyen-Van-Tam JS, et al. A Winter's Tale: coming to terms with winter respiratory illnesses. Health Protection Agency, 2005.
3. Pebody R, Hardelid P, Fleming D, et al. Effectiveness of seasonal 2010/11 and pandemic influenza A(H1N1)2009 vaccines in preventing influenza infection in the United Kingdom: mid-season analysis 2010/11. *Euro Surveill* 2011;16(6).
4. Mangtani P, Cumberland P, Hodgson CR, et al. A cohort study of the effectiveness of influenza vaccine in older people, performed using the United Kingdom general practice research database. *J Infect Dis* 2004;190(1):1-10.
5. Influenza [chapter 19]. *Immunisation against infectious disease*. Department of Health UK, 2011.
6. Davies S. Letter from the CMO: Preparation and Assurance for 2011/12 Seasonal Influenza Immunisation Programme. Department of Health UK, 2011.
7. 56th World Health Assembly. *Prevention and control of influenza pandemics and annual epidemics*. World Health Organisation, 2003.
8. Council of the European Union. Council Recommendation of 22 December 2009 on seasonal influenza vaccination (2009/1019/EU). *Official Journal of the European Union* 2009;348(71).
9. Begum F, Pebody R. Seasonal influenza vaccine uptake amongst GP patient groups in England, Winter season 2010-11. Department of Health, 2011.
10. *Annual Mid-year Population Estimates, 2010*. Office for National Statistics, 2011.
11. Blank PR, Schwenkglens M, Szucs TD. Vaccination coverage rates in eleven European countries during two consecutive influenza seasons. *J Infect* 2009;58(6):446-58.
12. Puleston RL, Bugg G, Hoschler K, et al. Observational study to investigate vertically acquired passive immunity in babies of mothers vaccinated against H1N1v during pregnancy. *Health Technol Assess* 2010;14(55):1-82.
13. Benowitz I, Esposito DB, Gracey KD, et al. Influenza vaccine given to pregnant women reduces hospitalization due to influenza in their infants. *Clin Infect Dis* 2010;51(12):1355-61.
14. Eick AA, Uyeki TM, Klimov A, et al. Maternal influenza vaccination and effect on influenza virus infection in young infants. *Arch Pediatr Adolesc Med* 2011;165(2):104-11.
15. Siriwardena AN, Rashid A, Johnson MR, et al. Cluster randomised controlled trial of an educational outreach visit to improve influenza and pneumococcal immunisation rates in primary care. *Br J Gen Pract* 2002;52(482):735-40.
16. Furey A, Robinson E, Young Y. Improving influenza immunisation coverage in 2000-2001: a baseline survey, review of the evidence and sharing of best practice. *Commun Dis Public Health* 2001;4(3):183-7.
17. [www.surveymonkey.com](http://www.surveymonkey.com). Accessed 22/07/2011
18. [www.immform.dh.gov.uk](http://www.immform.dh.gov.uk). Accessed 03/07/2011
19. Practice-level ethnicity and other demographic data for 2009 kindly provided by Dr Mark Ashworth, Department of Primary Care & Public Health Sciences, King's College London.
20. From: <http://www.ic.nhs.uk/statistics-and-data-collections/supporting-information/audits-and-performance/the-quality-and-outcomes-framework/qof-2009-10/data-tables>. Accessed 10/07/2011
21. Gillam S, Siriwardena A. *The Quality and Outcomes Framework: QOF transforming general practice*. Oxford: Radcliffe Publishing Ltd., 2010.
22. *Seasonal Flu Plan*. Department of Health UK, 2011.
23. Seasonal Influenza and Pneumococcal Immunisation Programmes 2010-11 (letter); Chief Medical Officer and Public Health Directorate Scotland, 2010

- 1
- 2
- 3 24. Bish A, Yardley L, Nicoll A, et al. Factors associated with uptake of vaccination against pandemic
- 4 influenza: A systematic review. *Vaccine* 2011;29(38):6472-84.
- 5 25. Maurer J, Harris KM. Contact and communication with healthcare providers regarding influenza
- 6 vaccination during the 2009-2010 H1N1 pandemic. *Prev Med* 2011;52(6):459-64.
- 7 26. Crawford VL, O'Hanlon A, McGee H. The effect of patient characteristics upon uptake of the
- 8 influenza vaccination: a study comparing community-based older adults in two healthcare
- 9 systems. *Age Ageing* 2011;40(1):35-41.
- 10 27. Myers LB, Goodwin R. Determinants of adults' intention to vaccinate against pandemic swine flu.
- 11 *BMC Public Health* 2011;11(1):15.
- 12 28. Keenan H, Campbell J, Evans PH. Influenza vaccination in patients with asthma: why is the uptake
- 13 so low? *Br J Gen Pract* 2007;57(538):359-63.
- 14 29. Humiston SG, Bennett NM, Long C, et al. Increasing inner-city adult influenza vaccination rates: a
- 15 randomized controlled trial. *Public Health Rep* 2011;126(Suppl 2):39-47.
- 16 30. Loo TS, Davis RB, Lipsitz LA, et al. Electronic medical record reminders and panel management to
- 17 improve primary care of elderly patients. *Arch Intern Med* 2011;171(17):1552-8.
- 18 31. Abramson ZH, Levi O. Is performance of influenza vaccination in the elderly related to treating
- 19 physician's self immunization and other physician characteristics? *Prev Med* 2008;47(5):550-
- 20 53.
- 21 32. Nichol KL, Zimmerman R. Generalist and subspecialist physicians' knowledge, attitudes, and
- 22 practices regarding influenza and pneumococcal vaccinations for elderly and other high-risk
- 23 patients: a nationwide survey. *Arch Intern Med* 2001;161(22):2702-8.
- 24 33. A review of the procurement of seasonal flu vaccine 2011. Immunisation Branch, Department of
- 25 Health UK, 2011.
- 26 34. Schembri S, Morant S, Winter JH, et al. Influenza but not pneumococcal vaccination protects
- 27 against all-cause mortality in patients with COPD. *Thorax* 2009;64(7):567-72.
- 28 35. Jackson LA, Gaglani MJ, Keyserling HL, et al. Safety, efficacy, and immunogenicity of an inactivated
- 29 influenza vaccine in healthy adults: a randomized, placebo-controlled trial over two influenza
- 30 seasons. *BMC Infect Dis* 2010;10:71.
- 31 36. Osterholm MT, Kelley NS, Sommer A, Belongia EA. Efficacy and effectiveness of influenza vaccines:
- 32 a systematic review and meta-analysis. *Lancet Infect Dis* 2012;12(1):36-44.
- 33
- 34
- 35
- 36
- 37
- 38
- 39
- 40
- 41
- 42
- 43
- 44
- 45
- 46
- 47
- 48
- 49
- 50
- 51
- 52
- 53
- 54
- 55
- 56
- 57
- 58
- 59
- 60

1  
2  
3 *Figure 1*

4 Box and whisker plots showing the range and distribution of influenza vaccination uptake rates for  
5 patients aged 65 years + (blue boxes and bars) and at-risk patients aged under 65 years (red boxes  
6 and bars). The distribution of uptake rates for non-participating practices (N = 2101) and participating  
7 practices (N = 795) are not significantly different.  
8  
9  
10  
11  
12  
13  
14  
15  
16  
17  
18  
19  
20  
21  
22  
23  
24  
25  
26  
27  
28  
29  
30  
31  
32  
33  
34  
35  
36  
37  
38  
39  
40  
41  
42  
43  
44  
45  
46  
47  
48  
49  
50  
51  
52  
53  
54  
55  
56  
57  
58  
59  
60

For peer review only



1  
2  
3  
4  
5  
6  
7  
8  
9  
10  
11  
12  
13  
14  
15  
16  
17  
18  
19  
20  
21  
22  
23  
24  
25  
26  
27  
28  
29  
30  
31  
32  
33  
34  
35  
36  
37  
38  
39  
40  
41  
42  
43  
44  
45  
46  
47  
48  
49  
50  
51  
52  
53  
54  
55  
56  
57  
58  
59  
60



review only

1  
2  
3 *Figure 2*

4 (a) Relationship between reported total number of vaccine doses ordered for the 2011-2012 season  
5 and actual number of doses administered in 2010-2011 (n = 568), and (b) Plot showing the maximum  
6 average achievable vaccination rates for the 2011-2012 season, based on the total number of vaccine  
7 doses ordered and the total number of eligible patients. Red line indicates the CMO's target of 75%.  
8  
9  
10  
11  
12  
13  
14  
15  
16  
17  
18  
19  
20  
21  
22  
23  
24  
25  
26  
27  
28  
29  
30  
31  
32  
33  
34  
35  
36  
37  
38  
39  
40  
41  
42  
43  
44  
45  
46  
47  
48  
49  
50  
51  
52  
53  
54  
55  
56  
57  
58  
59  
60

For peer review only

1  
2  
3  
4  
5  
6  
7  
8  
9  
10  
11  
12  
13  
14  
15  
16  
17  
18  
19  
20  
21  
22  
23  
24  
25  
26  
27  
28  
29  
30  
31  
32  
33  
34  
35  
36  
37  
38  
39  
40  
41  
42  
43  
44  
45  
46  
47  
48  
49  
50  
51  
52  
53  
54  
55  
56  
57  
58  
59  
60

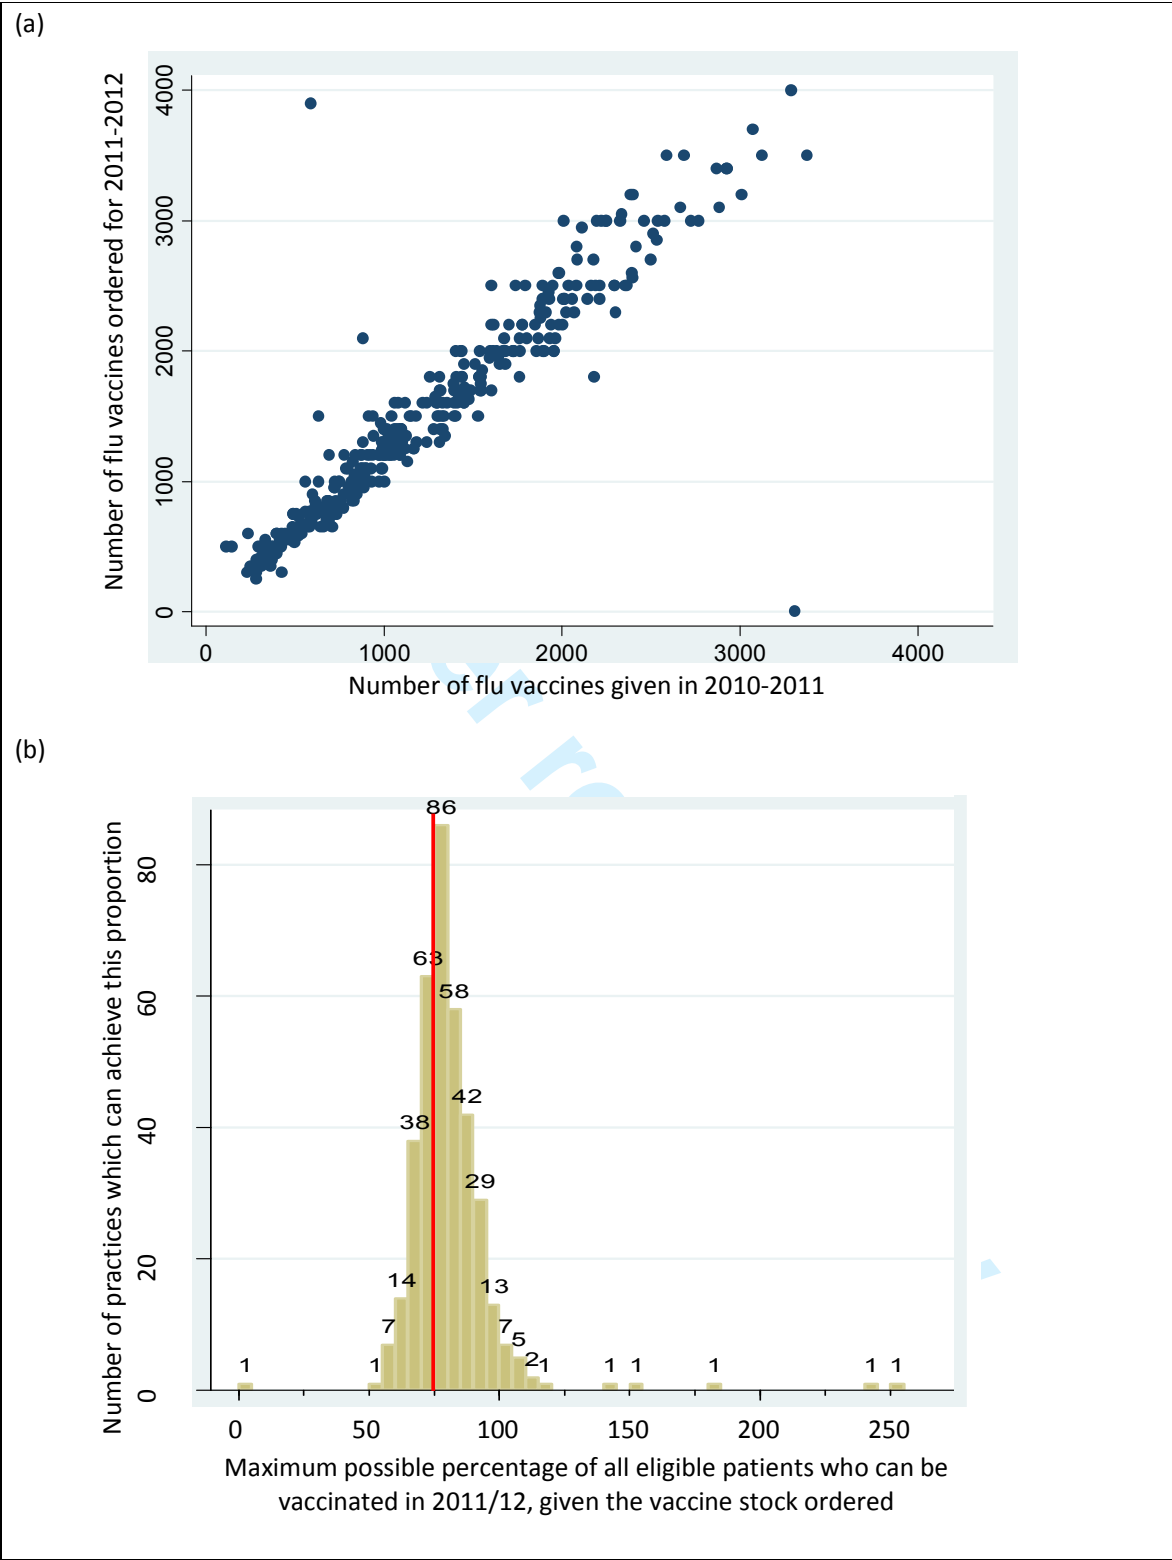

1  
2  
3  
4 *Figure 3*  
5  
6

7 Showing (a) the reported activity of community midwifery teams in recommending and providing  
8 seasonal influenza vaccination to pregnant women, and (b) the attitudes of participating healthcare  
9 workers to vaccination of colleagues and themselves  
10  
11  
12  
13  
14  
15  
16  
17  
18  
19  
20  
21  
22  
23  
24  
25  
26  
27  
28  
29  
30  
31  
32  
33  
34  
35  
36  
37  
38  
39  
40  
41  
42  
43  
44  
45  
46  
47  
48  
49  
50  
51  
52  
53  
54  
55  
56  
57  
58  
59  
60

For peer review only

1  
2  
3  
4  
5  
6  
7  
8  
9  
10  
11  
12  
13  
14  
15  
16  
17  
18  
19  
20  
21  
22  
23  
24  
25  
26  
27  
28  
29  
30  
31  
32  
33  
34  
35  
36  
37  
38  
39  
40  
41  
42  
43  
44  
45  
46  
47  
48  
49  
50  
51  
52  
53  
54  
55  
56  
57  
58  
59  
60



1  
2  
3 *Table 1a*

4  
5 | Statistically significant ~~results-factors~~ found on multivariate regression analysis of responses ~~from-common-to~~ all three types of staff (GPs, nursing staff and practice  
6 managers)  
7  
8  
9  
10  
11  
12  
13  
14  
15  
16  
17  
18  
19  
20  
21  
22  
23  
24  
25  
26  
27  
28  
29  
30  
31  
32  
33  
34  
35  
36  
37  
38  
39  
40  
41  
42  
43  
44  
45

For peer review only

1  
2  
3  
4  
5  
6  
7  
8  
9  
10  
11  
12  
13  
14  
15  
16  
17  
18  
19  
20  
21  
22  
23  
24  
25  
26  
27  
28  
29  
30  
31  
32  
33  
34  
35  
36  
37  
38  
39  
40  
41  
42  
43  
44  
45  
46  
47  
48  
49

| Description of significant factor                                                  | Regression co-efficient | 95% CI        | p-value | Number of clusters |
|------------------------------------------------------------------------------------|-------------------------|---------------|---------|--------------------|
| <i>For patients aged ≥65 years</i>                                                 |                         |               |         |                    |
| Producing a written report to review flu vaccine uptake rates                      | 0.065                   | 0.023 – 0.107 | 0.010   | 659                |
| Having a lead member of staff for planning the practice’s flu vaccination campaign | 0.144                   | 0.035 – 0.253 | 0.010   | 659                |
| Sending a personal invitation to all eligible patients                             | 0.081                   | 0.035 – 0.127 | 0.001   | 659                |
| Only stopping vaccination when QOF targets are reached                             | 0.085                   | 0.004 – 0.166 | 0.039   | 659                |
| <i>For at-risk patients aged &lt;65 years</i>                                      |                         |               |         |                    |
| Producing a written report to review flu vaccine uptake rates                      | 0.113                   | 0.042 – 0.184 | 0.002   | 783                |
| Having a lead member of staff for planning the practice’s flu vaccination campaign | 0.203                   | 0.054 – 0.352 | 0.008   | 783                |

review only

1  
2  
3 *Table 1b*

4  
5 | Statistically significant results-factors found on multivariate regression analysis of responses from practice managers only  
6  
7  
8  
9  
10  
11  
12  
13  
14  
15  
16  
17  
18  
19  
20  
21  
22  
23  
24  
25  
26  
27  
28  
29  
30  
31  
32  
33  
34  
35  
36  
37  
38  
39  
40  
41  
42  
43  
44  
45  
46  
47  
48  
49

For peer review only



1  
2  
3  
4  
5  
6  
7  
8  
9  
10  
11  
12  
13  
14  
15  
16  
17  
18  
19  
20  
21  
22  
23  
24  
25  
26  
27  
28  
29  
30  
31  
32  
33  
34  
35  
36  
37  
38  
39  
40  
41  
42  
43  
44  
45  
46  
47  
48  
49

| Description of significant factor                                                                            | Regression co-efficient | 95% CI        | p-value | Number of clusters |
|--------------------------------------------------------------------------------------------------------------|-------------------------|---------------|---------|--------------------|
| <i>For patients aged ≥65 years</i>                                                                           |                         |               |         |                    |
| Identifying eligible patients using a modified manufacturer’s search program                                 | 0.115                   | 0.056 – 0.175 | 0.000   | 395                |
| Identifying eligible patients using an in-house search program                                               | 0.096                   | 0.028 – 0.163 | 0.006   | 395                |
| Having a lead member of staff for identifying eligible patients in the practice                              | 0.086                   | 0.001 – 0.170 | 0.046   | 395                |
| <i>For at-risk patients aged &lt;65 years: no significant factors were identified by multiple regression</i> |                         |               |         |                    |

Peer review only

1  
2  
3 *Supplementary table 1*

4  
5 Showing results of linear regression analyses of relationship between seasonal flu vaccination uptake rates, for patients aged 65+ (clear cells) and patients aged under 65  
6  
7 (shaded cells), by ethnicity; deprivation; and Quality and Outcomes Framework summary scores [n = 795].  
8  
9  
10  
11  
12  
13  
14  
15  
16  
17  
18  
19  
20  
21  
22  
23  
24  
25  
26  
27  
28  
29  
30  
31  
32  
33  
34  
35  
36  
37  
38  
39  
40  
41  
42  
43  
44  
45  
46  
47  
48  
49

For peer review only

1  
2  
3  
4  
5  
6  
7  
8  
9  
10  
11  
12  
13  
14  
15  
16  
17  
18  
19  
20  
21  
22  
23  
24  
25  
26  
27  
28  
29  
30  
31  
32  
33  
34  
35  
36  
37  
38  
39  
40  
41  
42  
43  
44  
45  
46  
47  
48  
49

| Factor                                                | Regression coefficient | 95% confidence interval | p-value |
|-------------------------------------------------------|------------------------|-------------------------|---------|
| Increasing proportion of white ethnicity              | 0.015                  | -0.014 to 0.043         | 0.305   |
|                                                       | -0.140                 | -0.167 to -0.114        | <0.001  |
| Increasing index of multiple deprivation (IMD) score  | -0.0009                | -0.0015 to -0.0007      | <0.001  |
|                                                       | 0.0001                 | -0.0017 to 0.0004       | 0.380   |
| Increasing Quality and Outcomes Framework (QOF) score | 1.430                  | 1.299 to 1.561          | <0.001  |
|                                                       | 0.918                  | 0.781 to 1.054          | <0.001  |

Peer review only

1  
2  
3 *Supplementary table 2*

4  
5 Showing factor analysed, number of respondents, and results of logistic regression analyses of responses with respect to flu vaccination uptake rates in patients aged  
6  
7 65 years and over (clear boxes), uptake rates in patients aged under 65 years (shaded boxes) and uptake rates in otherwise healthy pregnant women (hatched boxes).  
8  
9 Calculations were performed using Stata and incorporate robust cluster adjustment to reflect the number of responding practices (where appropriate).  
10  
11  
12  
13  
14  
15  
16  
17  
18  
19  
20  
21  
22  
23  
24  
25  
26  
27  
28  
29  
30  
31  
32  
33  
34  
35  
36  
37  
38  
39  
40  
41  
42  
43  
44  
45  
46  
47  
48  
49

For peer review only

| Factor                                                                        | Respondents |     |     | Baseline                                                   | Comparator                                      | Regression co-efficient | 95% confidence interval | p-value | Number of clusters |
|-------------------------------------------------------------------------------|-------------|-----|-----|------------------------------------------------------------|-------------------------------------------------|-------------------------|-------------------------|---------|--------------------|
|                                                                               | PM          | PN  | GP  |                                                            |                                                 |                         |                         |         |                    |
| Lead member of staff for planning seasonal flu vaccination                    | 568         | 336 | 105 | YesNo                                                      | NoYes                                           | 0.185                   | 0.075 – 0.295           | 0.001   | 783                |
|                                                                               |             |     |     |                                                            |                                                 | 0.220                   | 0.069 – 0.371           | 0.004   |                    |
| Dedicated member of staff for identifying eligible patients                   | 414         | N/A | N/A | No                                                         | Yes                                             | 0.087                   | 0.005 – 0.169           | 0.038   | 397                |
|                                                                               |             |     |     |                                                            |                                                 | 0.080                   | -0.048 – 0.208          | 0.218   |                    |
| Use of a dedicated IT code to record appointment bookings for vaccination     | 414         | N/A | N/A | No                                                         | Yes                                             | 0.006                   | -0.054 – 0.066          | 0.844   | 380                |
|                                                                               |             |     |     |                                                            |                                                 | 0.092                   | 0.005 – 0.179           | 0.038   |                    |
| Methods used to encourage patients to attend for vaccination                  | 415         | 304 | 107 | General publicity only                                     | General publicity & personal invitation for all | 0.105                   | 0.032 – 0.177           | 0.005   | 662                |
|                                                                               |             |     |     | General publicity & personal invitation for non-responders | General publicity & personal invitation for all | 0.074                   | 0.025 – 0.124           | 0.003   |                    |
| Personal invitation methods used to invite patients to attend for vaccination | 362         | N/A | N/A | Letter or telephone calls                                  | Letter and telephone calls                      | 0.011                   | -0.051 – 0.073          | 0.721   | 338                |
|                                                                               |             |     |     |                                                            |                                                 | -0.009                  | -0.107 – 0.882          | 0.852   |                    |
| Number of reminders provided if the patient does not respond                  | 320         | N/A | N/A | Increasing numbers of reminders                            |                                                 | -0.018                  | -0.047 – 0.011          | 0.225   | 309                |
|                                                                               |             |     |     |                                                            |                                                 | 0.041                   | 0.002 – 0.079           | 0.038   |                    |
| Vaccination is offered before 8am                                             | 395         | 295 | N/A | No                                                         | Yes                                             | 0.014                   | -0.041 – 0.069          | 0.625   | 596                |
|                                                                               |             |     |     |                                                            |                                                 | -0.032                  | -0.111 – 0.048          | 0.434   |                    |
| Vaccination is offered after 6pm                                              | 395         | 295 | N/A | No                                                         | Yes                                             | 0.015                   | -0.030 – 0.061          | 0.506   | 595                |
|                                                                               |             |     |     |                                                            |                                                 | 0.011                   | -0.054 – 0.077          | 0.733   |                    |
| Vaccination is offered at weekends                                            | 395         | 295 | N/A | No                                                         | Yes                                             | -0.005                  | -0.054 – 0.044          | 0.834   | 594                |
|                                                                               |             |     |     |                                                            |                                                 | 0.003                   | -0.996 – 0.105          | 0.961   |                    |
| Local midwives recommend vaccine to pregnant women                            | 369         | N/A | N/A | Do not agree                                               | Agree                                           | 0.050                   | -0.087 – 0.187          | 0.474   | 356                |
| Local midwives provide vaccine to pregnant women                              | 376         | NA  | NA  | Do not agree                                               | Agree                                           | 0.178                   | 0.024 – 0.333           | 0.023   | 356                |
| Vaccination campaign is stopped when QOF targets are reached                  | 565         | 334 | 106 | No                                                         | Yes                                             | 0.078                   | 0.001 – 0.155           | 0.048   | 791                |
|                                                                               |             |     |     |                                                            |                                                 | 0.070                   | -0.014 – 0.153          | 0.100   |                    |
| How flu vaccination uptake rates are reviewed                                 | 565         | 334 | 106 | No written report                                          | Written report                                  | 0.057                   | 0.016 – 0.098           | 0.006   | 791                |
|                                                                               |             |     |     |                                                            |                                                 | 0.119                   | 0.044 – 0.195           | 0.002   |                    |
| How the practice flu vaccination strategy is reviewed                         | 543         | N/A | 87  | No written report                                          | Written report                                  | 0.076                   | -0.005 – 0.158          | 0.067   | 559                |
|                                                                               |             |     |     |                                                            |                                                 | 0.175                   | 0.019 – 0.330           | 0.028   |                    |
| Staff encourage colleagues to receive vaccination                             | 350         | 253 | 106 | Do not agree                                               | Agree                                           | 0.079                   | 0.026 – 0.132           | 0.004   | 575                |
|                                                                               |             |     |     |                                                            |                                                 | 0.055                   | -0.030 – 0.139          | 0.208   |                    |
| Staff themselves happy to have the flu vaccine                                | 347         | 253 | 106 | Do not agree                                               | Agree                                           | 0.019                   | -0.029 – 0.067          | 0.440   | 574                |
|                                                                               |             |     |     |                                                            |                                                 | 0.060                   | -0.029 – 0.149          | 0.185   |                    |

For peer review only

1  
2  
3  
4  
5  
6  
7  
8  
9  
10  
11  
12  
13  
14  
15  
16  
17  
18  
19  
20  
21  
22  
23  
24  
25  
26  
27  
28  
29  
30  
31  
32  
33  
34  
35  
36  
37  
38  
39  
40  
41  
42  
43  
44  
45  
46  
47  
48  
49

Figure 1

Box and whisker plots showing the range and distribution of influenza vaccination uptake rates for patients aged 65 years + (blue boxes and bars) and at-risk patients aged under 65 years (red boxes and bars). The distribution of uptake rates for non-participating practices (N = 2101) and participating practices (N = 795) are not significantly different.

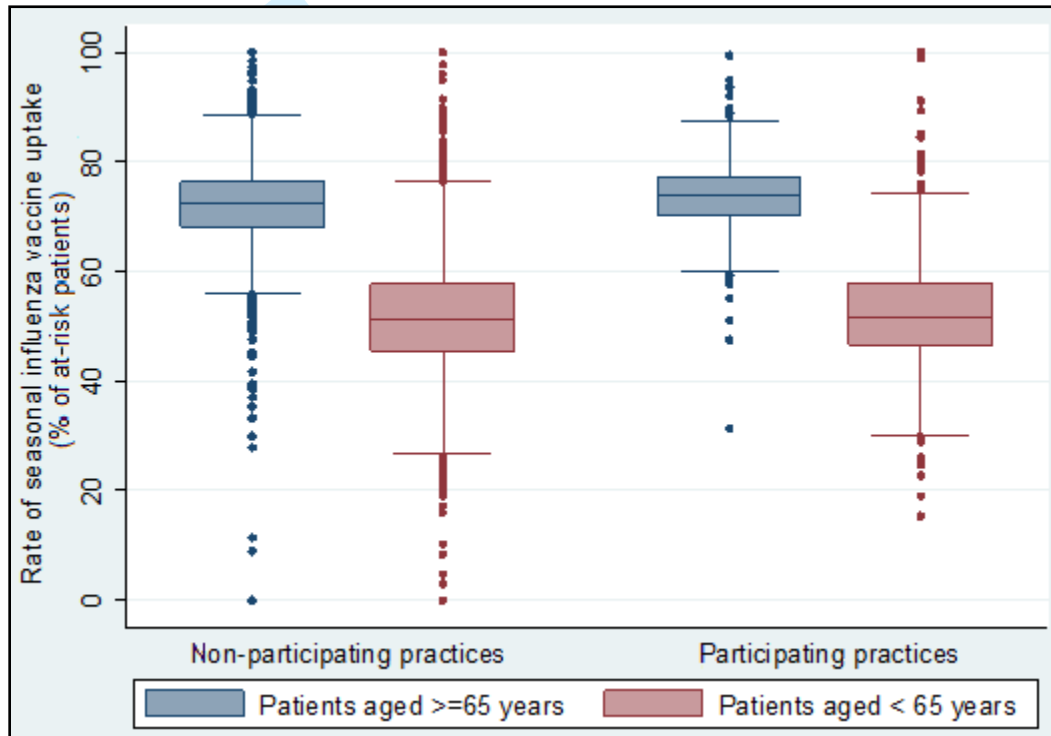

1  
2  
3  
4  
5  
6  
7  
8  
9  
10  
11  
12  
13  
14  
15  
16  
17  
18  
19  
20  
21  
22  
23  
24  
25  
26  
27  
28  
29  
30  
31  
32  
33  
34  
35  
36  
37  
38  
39  
40  
41  
42  
43  
44  
45  
46  
47  
48  
49  
50  
51  
52  
53  
54  
55  
56  
57  
58  
59  
60

For peer review only



1  
2  
3 *Figure 2*  
4

5 (a) Relationship between reported total number of vaccine doses ordered for the 2011-2012 season and  
6 actual number of doses administered in 2010-2011 (n = 568), and (b) Plot showing the maximum  
7 average achievable vaccination rates for the 2011-2012 season, based on the total number of vaccine  
8 doses ordered and the total number of eligible patients. Red line indicates the CMO's target of 75%.  
9  
10  
11  
12  
13  
14  
15  
16  
17  
18  
19  
20  
21  
22  
23  
24  
25  
26  
27  
28  
29  
30  
31  
32  
33  
34  
35  
36  
37  
38  
39  
40  
41  
42  
43  
44  
45  
46  
47  
48  
49  
50  
51  
52  
53  
54  
55  
56  
57  
58  
59  
60

1  
2  
3  
4  
5  
6  
7  
8  
9  
10  
11  
12  
13  
14  
15  
16  
17  
18  
19  
20  
21  
22  
23  
24  
25  
26  
27  
28  
29  
30  
31  
32  
33  
34  
35  
36  
37  
38  
39  
40  
41  
42  
43  
44  
45  
46  
47  
48  
49  
50  
51  
52  
53  
54  
55  
56  
57  
58  
59  
60

(a)

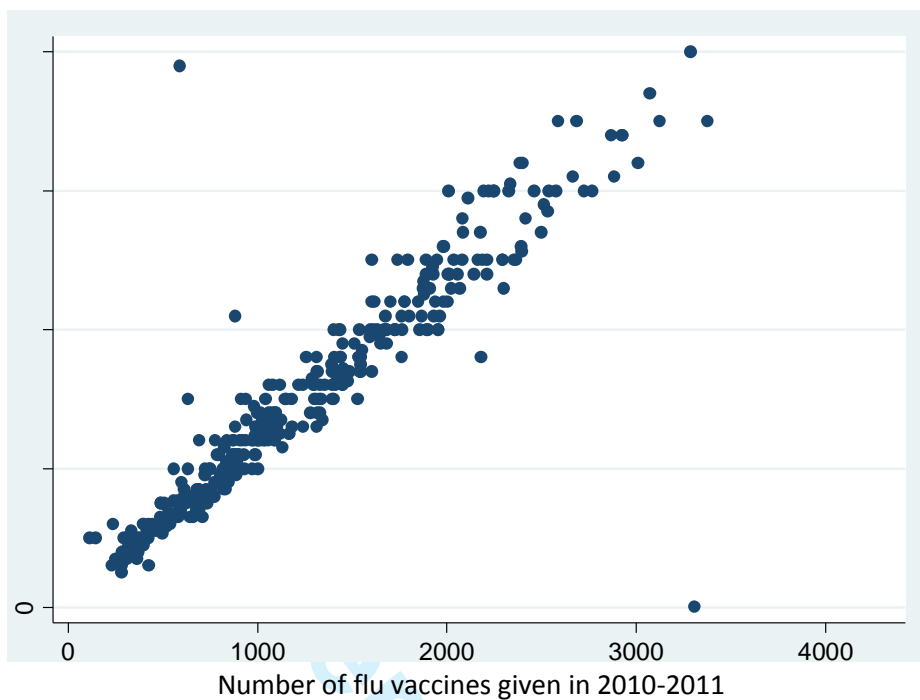

(b)

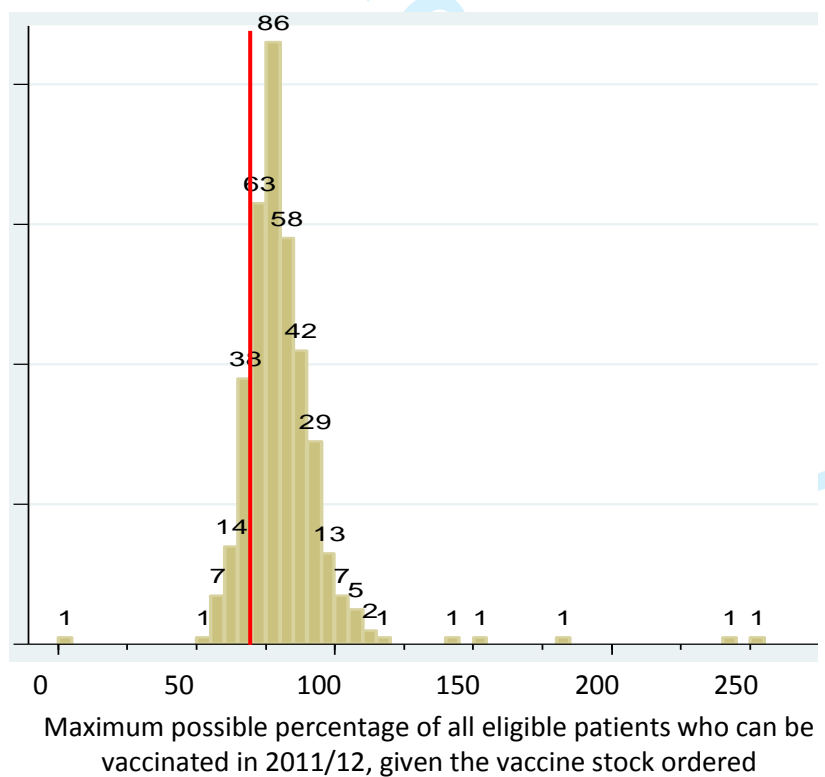

1  
2  
3  
4  
5  
6  
7  
8  
9  
10  
11  
12  
13  
14  
15  
16  
17  
18  
19  
20  
21  
22  
23  
24  
25  
26  
27  
28  
29  
30  
31  
32  
33  
34  
35  
36  
37  
38  
39  
40  
41  
42  
43  
44  
45  
46  
47  
48  
49  
50  
51  
52  
53  
54  
55  
56  
57  
58  
59  
60

For peer review only

1  
2  
3  
4  
5  
6  
7  
8  
9  
10  
11  
12  
13  
14  
15  
16  
17  
18  
19  
20  
21  
22  
23  
24  
25  
26  
27  
28  
29  
30  
31  
32  
33  
34  
35  
36  
37  
38  
39  
40  
41  
42  
43  
44  
45  
46  
47  
48  
49  
50  
51  
52  
53  
54  
55  
56  
57  
58  
59  
60

For peer review only

1  
2  
3 *Figure 3*  
4  
5  
6

7 Showing (a) the reported activity of community midwifery teams in recommending and providing  
8 seasonal influenza vaccination to pregnant women, and (b) the attitudes of participating healthcare  
9 workers to vaccination of colleagues and themselves  
10  
11  
12  
13  
14  
15  
16  
17  
18  
19  
20  
21  
22  
23  
24  
25  
26  
27  
28  
29  
30  
31  
32  
33  
34  
35  
36  
37  
38  
39  
40  
41  
42  
43  
44  
45  
46  
47  
48  
49  
50  
51  
52  
53  
54  
55  
56  
57  
58  
59  
60

For peer review only

1  
2  
3  
4  
5  
6  
7  
8  
9  
10  
11  
12  
13  
14  
15  
16  
17  
18  
19  
20  
21  
22  
23  
24  
25  
26  
27  
28  
29  
30  
31  
32  
33  
34  
35  
36  
37  
38  
39  
40  
41  
42  
43  
44  
45  
46  
47  
48  
49  
50  
51  
52  
53  
54  
55  
56  
57  
58  
59  
60

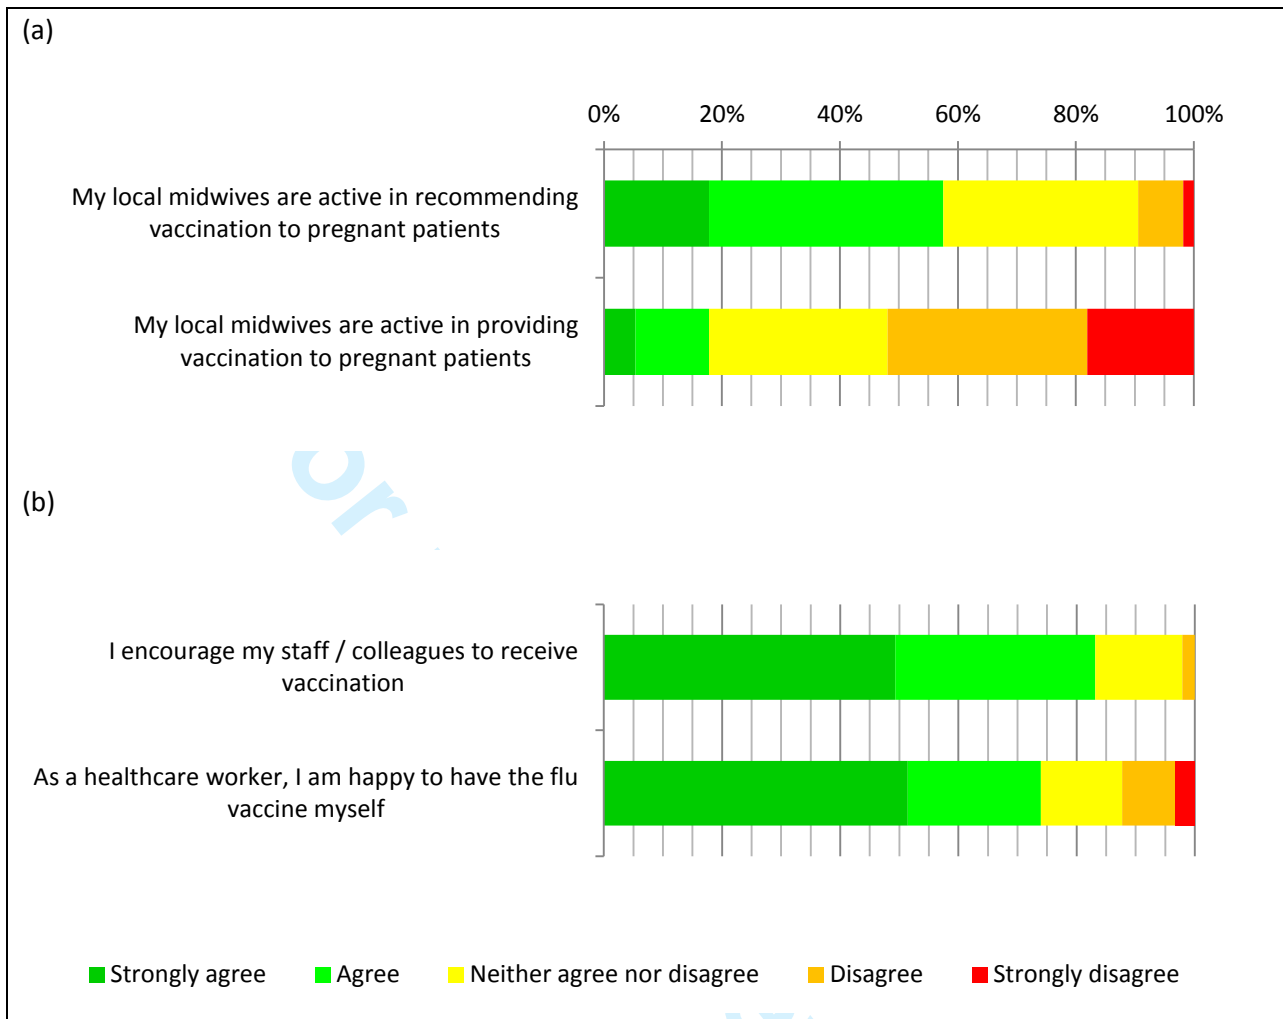

1  
2  
3  
4  
5  
6  
7  
8  
9  
10  
11  
12  
13  
14  
15  
16  
17  
18  
19  
20  
21  
22  
23  
24  
25  
26  
27  
28  
29  
30  
31  
32  
33  
34  
35  
36  
37  
38  
39  
40  
41  
42  
43  
44  
45  
46  
47  
48  
49  
50  
51  
52  
53  
54  
55  
56  
57  
58  
59  
60

For peer review only
